# Supplementary material for: Visible-light-mediated sequential Wolff rearrangement and Staudinger cycloaddition enabling the assembly of spiro-pyrazolone-β-lactams
Source: Royal Society of Chemistry journal article supplement (doi:10.1039/d2qo00742h), 2022-01-01

# Sequential Visible-Light-Mediated Wolff Rearrangement and Staudinger Cycloaddition Enabling Assembly of Spiro- Pyrazolone- $\beta$ -Lactams

Jie Tang, Zhen-Hui Yan, Gu Zhan,\* Qian-Qian Yang, Ying-Ying Chen, Xiang Li,\*  
Wei Huang\*

*State Key Laboratory of Southwestern Chinese Medicine Resources, Hospital of Chengdu  
University of Traditional Chinese Medicine, School of Pharmacy, Chengdu University of  
Traditional Chinese Medicine, Chengdu 611137*

## Supporting Information

|                                                                                                                                    |           |
|------------------------------------------------------------------------------------------------------------------------------------|-----------|
| <b>1. General information .....</b>                                                                                                | <b>2</b>  |
| <b>2. Optimization of the model reaction (Table S1).....</b>                                                                       | <b>3</b>  |
| <b>3. General procedure for the synthesis of products 3.....</b>                                                                   | <b>3</b>  |
| <b>4. Scale-up synthesis of product 3a .....</b>                                                                                   | <b>14</b> |
| <b>5. Synthesis of other spiro-<math>\beta</math>-Lactams and deprotection of <i>N</i>-Boc<br/>group of products 5 and 8 .....</b> | <b>14</b> |
| <b>6. Synthetic transformation of spiro-pyrazolone-<math>\beta</math>-lactam 3a.....</b>                                           | <b>17</b> |
| <b>7. NOE experiments of products 3aa and 3aa' .....</b>                                                                           | <b>18</b> |
| <b>8. X-ray crystal structure of products 3a and 14.....</b>                                                                       | <b>19</b> |
| <b>9. <math>^1\text{H}</math> NMR and <math>^{13}\text{C}</math> NMR spectra .....</b>                                             | <b>22</b> |

## 1. General information

Nuclear magnetic resonance (NMR) spectra were recorded in Chloroform-*d* on Bruker 600, 700 MHz, or JEOL 600 NMR instrument (at 400, 600 or 700 MHz for  $^1\text{H}$ , and at 100, 150, or 175 MHz for  $^{13}\text{C}$ ). Proton chemical shifts are reported in parts per million ( $\delta$  scale). The  $^1\text{H}$  NMR chemical shifts are reported in ppm with the internal TMS signal at 0.0 ppm as standard. The  $^{13}\text{C}$  NMR chemical shifts were given using Chloroform-*d* or DMSO-*d*<sub>6</sub> as the internal standard (Chloroform-*d*:  $\delta = 77.00$  ppm, DMSO-*d*<sub>6</sub>:  $\delta = 39.50$  ppm). Data are reported as follows: chemical shift [multiplicity (s = singlet, d = doublet, t = triplet, q = quartet, m = multiplet, br s = broad singlet), coupling constant(s) (Hz), integration]. High-resolution mass spectra (HRMS) were obtained using Agilent P/N G1969-90010 or Waters/Acquity UPLC-Synapt G2HDMS. High-resolution mass spectra were reported for the molecular ion  $[\text{M}+\text{Na}]^+$ . X-ray diffraction experiment was carried out on an Agilent Gemini and the data obtained were deposited at the Cambridge Crystallographic Data Centre. UV detection was performed at 254 nm. Column chromatography was performed on silica gel (200-300 mesh) using an eluent of ethyl acetate (EA) and petroleum ether (PE). TLC was performed on glass-backed silica plates; products were visualized using UV light. All reagents and solvents were obtained from commercial sources and used without further purification. pyrazolone-derived phenyl ketimines **1**,<sup>[1]</sup>  $\alpha$ -diazoketones **2**,<sup>[2]</sup> arylalkylketenes<sup>[3]</sup> and other ketimines<sup>[4]</sup> were prepared according to the literature procedures. Six position parallel photocatalytic reactor were used as the reaction instrument. Melting points were recorded on BUCHI Melting Point M-565 instrument.

## Reference

1. P. Chauhan, S. Mahajan, U. Kaya, A. Peuronen, K. Rissanen, D. Enders, Asymmetric Synthesis of Amino-Bis-Pyrazolone Derivatives via an Organocatalytic Mannich Reaction. *J. Org. Chem.* 2017, **82**, 7050-7058.
2. J. R. Denton, H. M. L. Davies, Enantioselective Reactions of Donor/Acceptor Carbenoids Derived from  $\alpha$ -Aryl- $\alpha$ -Diazoketones. *Org. Lett.* 2009, **11**, 787-790.
3. L. M. Baigrie, H. R. Seiklay, T. T. Tidwell, Stereospecific formation of enolates from reaction of unsymmetrical ketenes and organolithium reagents. *J. Am. Chem. Soc.* 1985, **107**, 5391-5396.
4. T. Niwa, H. Yorimitsu, K. Oshima, Palladium-Catalyzed Benzylic Arylation of N-Benzylxanthone Imine. *Org. Lett.* 2008, **10**, 4689-4691.

## 2. Optimization of the model reaction (Table S1)

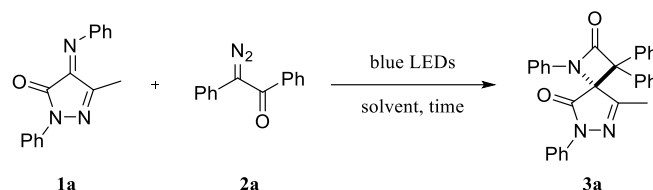

| Entry           | Wave length (nm) | Wattage (W) | solvent            | Time (h) | Yield (%) <sup>b</sup> |
|-----------------|------------------|-------------|--------------------|----------|------------------------|
| 1               | 410-415          | 6           | DCM                | 2        | 78                     |
| 2               | 460-465          | 6           | DCM                | 1        | 82                     |
| 3               | 520-525          | 6           | DCM                | 24       | 70                     |
| 4               | 590-595          | 6           | DCM                | 48       | 60                     |
| 5               | 620-625          | 6           | DCM                | 48       | 65                     |
| 6               | 460-465          | 3           | DCM                | 2        | 82                     |
| 7               | 460-465          | 9           | DCM                | 1        | 84                     |
| 8               | 460-465          | 12          | DCM                | 1        | 82                     |
| 9               | 460-465          | 9           | THF                | 2        | 61                     |
| 10              | 460-465          | 9           | Toluene            | 1.5      | 65                     |
| 11              | 460-465          | 9           | CH <sub>3</sub> CN | 2        | 79                     |
| 12              | 460-465          | 9           | EA                 | 2        | 74                     |
| 13              | 460-465          | 9           | Et <sub>2</sub> O  | 2.5      | 66                     |
| 14 <sup>c</sup> | 460-465          | 9           | DCM                | 1        | 84                     |
| 15 <sup>d</sup> | 460-465          | 9           | DCM                | 1        | 81                     |
| 16 <sup>e</sup> | 460-465          | 9           | DCM                | 1        | 85                     |
| 17 <sup>f</sup> | 460-465          | 9           | DCM                | 1        | 88                     |

<sup>a</sup>Unless otherwise noted, for the reaction, a mixture of **1a** (0.1 mmol) and **2a** (0.15 mmol) in 1.0 mL of solvent was irradiated at room temperature under LEDs light. <sup>b</sup>Isolated yields. <sup>c</sup>The ratio of **1a/2a** was 1.0:2.0. <sup>d</sup>The ratio of **1a/2a** was 1.0:2.5. <sup>e</sup>With MgSO<sub>4</sub>. <sup>f</sup>With 4 Å molecular sieves. DCM: dichloromethane; THF: tetrahydrofuran; EA: ethyl acetate; Et<sub>2</sub>O: diethyl ether

## 3. General procedure for the synthesis of products 3

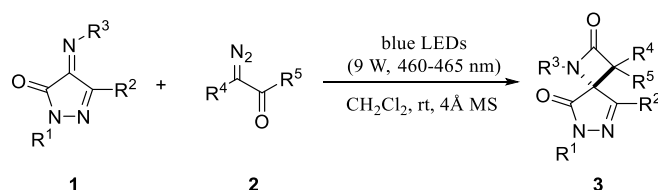

Pyrazolone-derived phenyl ketimines **1** (0.1 mmol) and  $\alpha$ -diazoketones **2** (0.2 mmol, 2.0 equiv.) were dissolved in CH<sub>2</sub>Cl<sub>2</sub> (1.0 mL). At room temperature, the reaction mixture was then irradiated under blue LEDs for hours until the complete consumption of **1** (monitored by TLC). The reaction mixture was concentrated and the residue was purified by flash chromatography on silica gel (PE/EA = 80/1) to give the pure products **3**.

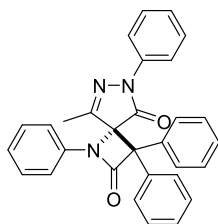

**8-methyl-1,3,3,6-tetraphenyl-1,6,7-triazaspiro[3.4]oct-7-ene-2,5-dione (3a):**

The residue was purified by a silica gel flash chromatography (PE/EA = 80/1) giving the product **3a** as a white solid in 88% yield (40.2 mg), m. p. 183.4 – 184.4 °C. <sup>1</sup>H NMR (700 MHz, Chloroform-*d*) δ 7.81 (dd, *J* = 8.4, 0.7 Hz, 2H), 7.59 (d, *J* = 7.7 Hz, 2H), 7.54 – 7.50 (m, 2H), 7.40 – 7.35 (m, 2H), 7.29 (t, *J* = 7.7 Hz, 2H), 7.26 – 7.19 (m, 6H), 7.18 – 7.15 (m, 3H), 7.06 – 7.02 (m, 1H), 1.37 (s, 3H). <sup>13</sup>C NMR (175 MHz, Chloroform-*d*) δ 167.8, 164.6, 158.6, 137.8, 136.7, 136.6, 136.2, 129.7, 129.17, 129.15, 128.6, 128.4, 128.2, 127.3, 127.0, 125.6, 125.4, 118.4, 116.6, 77.3, 72.8, 15.4. HRMS (ESI-TOF) *m/z* [M + Na]<sup>+</sup> Calcd for C<sub>30</sub>H<sub>23</sub>N<sub>3</sub>O<sub>2</sub>Na 480.1683; found 480.1682.

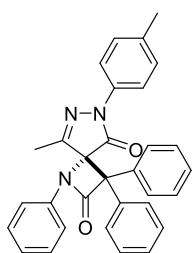

**8-methyl-1,3,3-triphenyl-6-(*p*-tolyl)-1,6,7-triazaspiro[3.4]oct-7-ene-2,5-dione (3b):**

The residue was purified by a silica gel flash chromatography (PE/EA = 80/1) giving the product **3b** as a white solid in 86% yield (40.5 mg), m. p. 190.0 – 191.2 °C. <sup>1</sup>H NMR (600 MHz, Chloroform-*d*) δ 7.69 (d, *J* = 8.4 Hz, 2H), 7.59 (d, *J* = 7.2 Hz, 2H), 7.53 – 7.49 (m, 2H), 7.29 (t, *J* = 7.8 Hz, 2H), 7.26 – 7.19 (m, 6H), 7.19 – 7.14 (m, 4H), 7.04 (t, *J* = 7.8 Hz, 1H), 2.31 (s, 3H), 1.36 (s, 3H). <sup>13</sup>C NMR (150 MHz, Chloroform-*d*) δ 167.6, 164.6, 158.5, 136.8, 136.6, 136.3, 135.4, 135.3, 129.7, 129.6, 129.2, 128.6, 128.4, 128.2, 127.3, 127.0, 125.4, 118.4, 116.6, 77.2, 72.7, 21.0, 15.4. HRMS (ESI-TOF) *m/z* [M + Na]<sup>+</sup> Calcd for C<sub>31</sub>H<sub>25</sub>N<sub>3</sub>O<sub>2</sub>Na 494.1839; found 494.1849.

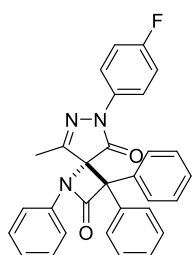

**6-(4-fluorophenyl)-8-methyl-1,3,3-triphenyl-1,6,7-triazaspiro[3.4]oct-7-ene-2,5-dione (3c):**

The residue was purified by a silica gel flash chromatography (PE/EA = 80/1) giving the product **3c** as a white solid in 68% yield (32.2 mg), m. p. 195.6 – 197.6 °C; <sup>1</sup>H NMR (600 MHz, Chloroform-*d*) δ 7.81 – 7.76 (m, 2H), 7.59 (d, *J* = 7.2 Hz, 2H), 7.53 – 7.48 (m, 2H), 7.30 (t, *J* = 8.4 Hz, 2H), 7.26 – 7.19 (m, 6H), 7.17 – 7.15 (dd, *J* = 9.0, 1.2 Hz, 2H), 7.08 – 7.03 (m, 3H), 1.37 (s, 3H). <sup>13</sup>C NMR (150 MHz, Chloroform-*d*) δ 167.7, 164.5, 160.1 (d, *J*<sub>C,F</sub> = 246.1 Hz), 158.9, 136.58, 136.56, 136.1, 134.0 (d, *J*<sub>C,F</sub> = 1.5 Hz), 129.7, 129.2, 128.6, 128.5, 128.3, 127.2, 127.0, 125.5, 120.2 (d, *J*<sub>C,F</sub> = 7.5 Hz), 116.5, 115.9 (d, *J*<sub>C,F</sub> = 22.5 Hz), 77.4, 72.7, 15.4. HRMS (ESI-TOF) *m/z* [M + Na]<sup>+</sup> Calcd for C<sub>30</sub>H<sub>22</sub>FN<sub>3</sub>O<sub>2</sub>Na 498.1589; found 498.1581.

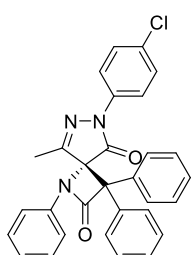

**6-(4-chlorophenyl)-8-methyl-1,3,3-triphenyl-1,6,7-triazaspiro[3.4]oct-7-ene-2,5-dione (3d):**

The residue was purified by a silica gel flash chromatography (PE/EA = 80/1) giving the product **3d** as a white solid in 85% yield (41.6 mg), m. p. 185.0 – 188.7 °C. <sup>1</sup>H NMR (700 MHz, Chloroform-*d*) δ 7.80 – 7.75 (m, 2H), 7.58 (d, *J* = 7.7 Hz, 2H), 7.49 (d, *J* = 7.0 Hz, 2H), 7.35 – 7.30 (m, 2H), 7.30 (t, *J* = 7.7 Hz, 2H), 7.27 – 7.18 (m, 6H), 7.16 – 7.14 (m, 2H), 7.05 (t, *J* = 8.4 Hz, 1H), 1.37 (s, 3H). <sup>13</sup>C NMR (175 MHz, Chloroform-*d*) δ 167.8, 164.5, 159.1, 136.5, 136.3, 136.1, 130.7, 129.7, 129.21, 129.18, 128.6, 128.5, 128.3, 127.2, 127.0, 125.5, 119.5, 116.5, 77.5, 72.8, 15.5. HRMS (ESI-TOF) *m/z* [M + Na]<sup>+</sup> calcd for C<sub>30</sub>H<sub>22</sub>ClN<sub>3</sub>O<sub>2</sub>Na 514.1293; found 514.1300.

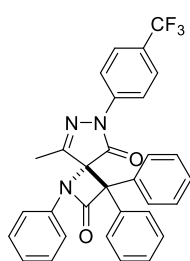

**8-methyl-1,3,3-triphenyl-6-(4-(trifluoromethyl)phenyl)-1,6,7-triazaspiro[3.4]oct-7-ene-2,5-dione (3e):** The residue was purified by a silica gel flash chromatography (PE/EA = 80/1) giving the product **3e** as a white solid in 85% yield (44.7 mg), m. p. 151.1 – 152.3 °C. <sup>1</sup>H NMR (700 MHz, Chloroform-*d*) δ 7.97 (d, *J* = 8.4 Hz, 2H), 7.62 (d, *J* = 8.4 Hz, 2H), 7.58 (d, *J* = 6.3 Hz, 2H), 7.49 (d, *J* = 7.0 Hz, 2H), 7.31 (t, *J* = 7.7 Hz, 2H), 7.28 – 7.18 (m, 6H), 7.15 (d, *J* = 8.4 Hz, 2H), 7.06 (t, *J* = 7.7 Hz, 1H), 1.40 (s, 3H). <sup>13</sup>C NMR (175 MHz, Chloroform-*d*) δ 168.2, 164.4, 159.5, 140.4, 136.5, 136.4, 136.0, 129.8, 129.2, 128.7, 128.6, 128.4, 127.2, 127.0, 127.2 (q, *J*<sub>C,F</sub> = 31.6 Hz), 126.4, 125.6, 124.0 (q, *J*<sub>C,F</sub> = 271.0 Hz), 118.0, 116.5, 77.8, 72.9, 15.5. HRMS (ESI-TOF) *m/z* [M + Na]<sup>+</sup> Calcd for C<sub>31</sub>H<sub>22</sub>F<sub>3</sub>N<sub>3</sub>O<sub>2</sub>Na 548.1557; found 548.1562.

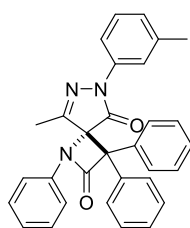

**8-methyl-1,3,3-triphenyl-6-(*m*-tolyl)-1,6,7-triazaspiro[3.4]oct-7-ene-2,5-dione (3f):** The residue was purified by a silica gel flash chromatography (PE/EA = 80/1) giving the product **3f** as a white solid in 81% yield (38.0 mg), m. p. 178.1 – 180.0 °C. <sup>1</sup>H NMR (700 MHz, Chloroform-*d*) δ 7.64 (s, 1H), 7.62 (d, *J* = 7.7 Hz, 1H), 7.58 (d, *J* = 8.4 Hz, 2H), 7.54 – 7.49 (m, 2H), 7.31 – 7.27 (m, 2H), 7.25 – 7.21 (m, 5H), 7.21 – 7.15 (m, 4H), 7.06 – 7.02 (m, 1H), 7.00 (d, *J* = 6.3 Hz, 1H), 2.34 (s, 3H), 1.37 (s, 3H). <sup>13</sup>C NMR (175 MHz, Chloroform-*d*) δ 167.7, 164.6, 158.5, 139.2, 137.8, 136.8, 136.6, 136.2, 129.7, 129.2, 129.0, 128.6, 128.4, 128.2, 127.3, 127.0, 126.4, 125.4, 119.0, 116.6, 115.7, 77.3, 72.8, 21.7, 15.4. HRMS (ESI-TOF) *m/z* [M + Na]<sup>+</sup> Calcd for C<sub>31</sub>H<sub>25</sub>N<sub>3</sub>O<sub>2</sub>Na 494.1839; found 494.1844.

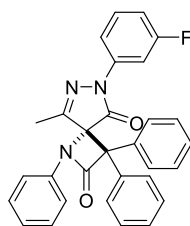

**6-(3-fluorophenyl)-8-methyl-1,3,3-triphenyl-1,6,7-triazaspiro[3.4]oct-7-ene-2,5-dione (3g):** The residue was purified by a silica gel flash chromatography (PE/EA = 80/1) giving the product **3g** as a white solid in 87% yield (41.4 mg), m. p. 130.6 – 132.7 °C. <sup>1</sup>H NMR (700 MHz, Chloroform-*d*) δ 7.66 – 7.62 (m, 1H), 7.62 – 7.54 (m, 3H), 7.51 – 7.47 (m, 2H), 7.34 – 7.27 (m, 3H), 7.27 – 7.19 (m, 6H), 7.15 (dd, *J* = 9.1, 1.4 Hz, 2H), 7.05 (t, *J* = 7.0 Hz, 1H), 6.90 – 6.84 (m, 1H), 1.38 (s, 3H). <sup>13</sup>C NMR (175 MHz, Chloroform-*d*) δ 167.9, 164.5, 163.0 (d, *J*<sub>C,F</sub> = 244.6 Hz), 159.1, 139.1 (d, *J*<sub>C,F</sub> = 10.5 Hz), 136.5, 136.0, 130.5 (d, *J*<sub>C,F</sub> = 8.8 Hz), 129.7, 129.2, 128.6, 128.5, 128.3, 127.2, 127.0, 125.5, 116.5, 113.7, 112.3, 112.2, 105.9 (d, *J*<sub>C,F</sub> = 28.1 Hz), 77.6, 72.89, 15.4; HRMS (ESI-TOF) *m/z* [M + Na]<sup>+</sup> Calcd for C<sub>30</sub>H<sub>22</sub>FN<sub>3</sub>O<sub>2</sub>Na 498.1589; found 498.1592.

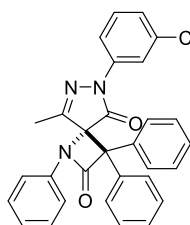

**6-(3-chlorophenyl)-8-methyl-1,3,3-triphenyl-1,6,7-triazaspiro[3.4]oct-7-ene-2,5-dione (3h):** The residue was purified by a silica gel flash chromatography (PE/EA = 80/1) giving the product **3h** as a white solid in 93% yield (45.8 mg), m. p. 147.6 – 149.1 °C. <sup>1</sup>H NMR (700 MHz, Chloroform-*d*) δ 7.86 (s, 1H), 7.77 – 7.73 (m, 1H), 7.58 (d, *J* = 7.7 Hz, 2H), 7.49 (d, *J* = 7.7 Hz, 2H), 7.32 – 7.25 (m, 3H), 7.27 – 7.18 (m, 6H), 7.15 (d, *J* = 7.7 Hz, 3H), 7.05 (t, *J* = 7.0 Hz, 1H), 1.38 (s, 3H). <sup>13</sup>C NMR (175 MHz, Chloroform-*d*) δ 167.9, 164.5, 159.2, 138.8, 136.5, 136.0, 135.0, 130.2, 129.8, 129.2, 128.6, 128.5, 128.4, 127.2, 127.0, 125.54, 125.50, 125.47, 118.3, 116.5, 116.3, 77.6, 72.8, 15.4. HRMS (ESI-TOF) *m/z*: [M + Na]<sup>+</sup> Calcd for C<sub>30</sub>H<sub>22</sub>ClN<sub>3</sub>O<sub>2</sub>Na 514.1293; found 514.1303.

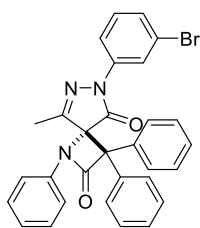

**6-(3-bromophenyl)-8-methyl-1,3,3-triphenyl-1,6,7-triazaspiro[3.4]oct-7-ene-2,5-dione (3i):** The residue was purified by a silica gel flash chromatography (PE/EA = 60/1) giving the product **3i** as a white solid in 68% yield (36.5 mg); m. p. 154.2 – 158.4 °C. <sup>1</sup>H NMR (700 MHz, Chloroform-*d*) δ 8.01 (t, *J* = 2.1 Hz, 1H), 7.80 (dd, *J* = 7.7, 0.7 Hz, 1H), 7.58 (d, *J* = 7.7 Hz, 2H), 7.49 (d, *J* = 7.0 Hz, 2H), 7.32 – 7.27 (m, 3H), 7.27 – 7.19 (m, 7H), 7.15 (d, *J* = 7.7 Hz, 2H), 7.05 (t, *J* = 7.7 Hz, 1H), 1.38 (s, 3H). <sup>13</sup>C NMR (175 MHz, Chloroform-*d*) δ 167.9, 164.5, 159.2, 138.9, 136.5, 136.0, 130.5, 129.8, 129.2, 128.6, 128.5, 128.43, 128.41, 128.35, 127.2, 127.0, 125.6, 122.9, 121.2, 116.7, 116.5, 77.6, 72.8, 15.4. HRMS (ESI-TOF) *m/z* [M + Na]<sup>+</sup> Calcd for C<sub>30</sub>H<sub>22</sub>BrN<sub>3</sub>O<sub>2</sub>Na 558.0788; found 558.0795.

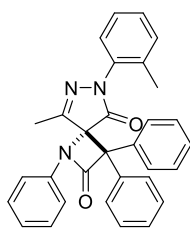

**8-methyl-1,3,3-triphenyl-6-(*o*-tolyl)-1,6,7-triazaspiro[3.4]oct-7-ene-2,5-dione (3j):** The residue was purified by a silica gel flash chromatography (PE/EA = 80/1) giving the product **3j** as a white solid in 92% yield (43.4 mg), m. p. 178.7 – 180.2 °C. <sup>1</sup>H NMR (700 MHz, Chloroform-*d*) δ 7.64 (d, *J* = 7.7 Hz, 2H), 7.55 – 7.50 (m, 2H), 7.34 (t, *J* = 7.7 Hz, 2H), 7.31 – 7.25 (m, 3H), 7.24 – 7.20 (m, 2H), 7.19 – 7.16 (m, 6H), 7.20 – 7.15 (m, 1H), 7.08 (m, 1H), 2.16 (s, 3H), 1.38 (s, 3H). <sup>13</sup>C NMR (175 MHz, Chloroform-*d*) δ 168.3, 164.9, 158.7, 136.7, 136.2, 135.9, 135.2, 134.6, 131.4, 129.7, 129.1, 128.6, 128.5, 128.4, 128.1, 127.3, 126.8, 125.5, 125.3, 116.6, 77.0, 71.8, 18.7, 15.5. HRMS (ESI-TOF) *m/z* [M + Na]<sup>+</sup> Calcd for C<sub>31</sub>H<sub>25</sub>N<sub>3</sub>O<sub>2</sub>Na 494.1839; found 494.1846.

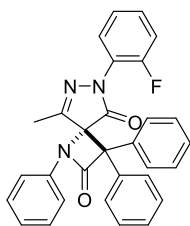

**6-(2-fluorophenyl)-8-methyl-1,3,3-triphenyl-1,6,7-triazaspiro[3.4]oct-7-ene-2,5-dione (3k):** The residue was purified by a silica gel flash chromatography (PE/EA = 80/1) giving the product **3k** as a white solid in 79% yield (37.6 mg), m. p. 185.8 – 187.8 °C. <sup>1</sup>H NMR (700 MHz, Chloroform-*d*) δ 7.65 (d, *J* = 7.7 Hz, 2H), 7.59 (dd, *J* = 8.4, 1.4 Hz, 2H), 7.48 – 7.42 (m, 1H), 7.33 – 7.28 (m, 3H), 7.27 – 7.21 (m, 7H), 7.19 – 7.14 (m, 3H), 7.07 (t, *J* = 7.0 Hz, 1H), 1.36 (s, 3H). <sup>13</sup>C NMR (175 MHz, Chloroform-*d*) δ 168.6, 164.6, 159.1, 156.8 (d, *J*<sub>C,F</sub> = 253.4 Hz), 136.6, 135.8, 129.9, 129.8, 129.7, 129.1, 128.5, 128.4, 128.3, 127.5, 127.0, 126.6, 125.5, 124.8 (d, *J*<sub>C,F</sub> = 12.3 Hz), 124.6, 117.0 (d, *J*<sub>C,F</sub> = 19.3 Hz), 116.6, 77.2, 71.7, 15.40. HRMS (ESI-TOF) *m/z* [M + Na]<sup>+</sup> Calcd for C<sub>30</sub>H<sub>22</sub>FN<sub>3</sub>NaO<sub>2</sub>Na 498.1589; found 498.1596.

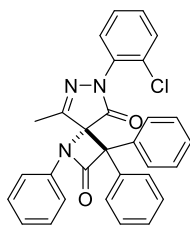

**6-(2-chlorophenyl)-8-methyl-1,3,3-triphenyl-1,6,7-triazaspiro[3.4]oct-7-ene-2,5-dione (3l):** The residue was purified by a silica gel flash chromatography (PE/EA = 60/1) giving the product **3l** as a white solid in 67% yield (33.1 mg), m. p. 159.2 – 163.4 °C. <sup>1</sup>H NMR (600 MHz, Chloroform-*d*) δ 7.68 (d, *J* = 7.2 Hz, 2H), 7.59 (d, *J* = 7.2 Hz, 2H), 7.48 – 7.43 (m, 1H), 7.38 (dd, *J* = 7.2, 1.8 Hz, 1H), 7.33 (t, *J* = 7.2 Hz, 2H), 7.28 (m, 7H), 7.22 (t, *J* = 7.2 Hz, 2H), 7.17 (d, *J* = 8.4 Hz, 1H), 7.08 (m, 1H), 1.37 (s, 3H). <sup>13</sup>C NMR (150 MHz, Chloroform-*d*) δ 166.8, 163.1, 157.1, 135.0, 134.7, 133.7, 132.7, 130.0, 129.1, 128.4, 128.0, 127.5, 126.81, 126.78, 126.74, 126.66, 126.2, 126.1, 125.6, 123.9, 115.0, 75.6, 70.0, 13.8. HRMS (ESI-TOF) *m/z* [M + Na]<sup>+</sup> Calcd for C<sub>30</sub>H<sub>22</sub>ClN<sub>3</sub>O<sub>2</sub>Na 514.1293; found 514.1298.

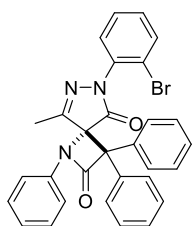

**6-(2-bromophenyl)-8-methyl-1,3,3-triphenyl-1,6,7-triazaspiro[3.4]oct-7-ene-2,5-dione (3m):** The residue was purified by a silica gel flash chromatography (PE/EA = 60/1) giving the product **3m** as a white solid in 82% yield (44.2 mg), m. p. 197.5 – 199.5 °C. <sup>1</sup>H NMR (700 MHz, Chloroform-*d*) δ 7.70 (d, *J* = 1.4 Hz, 2H), 7.65 (d, *J* = 7.0 Hz, 1H), 7.63 – 7.58 (m, 2H), 7.37 – 7.31 (m, 4H), 7.31 – 7.25 (m, 5H), 7.25 – 7.18 (m, 3H), 7.16 (t, *J* = 7.0 Hz, 1H), 7.11 – 7.06 (m, 1H), 1.37 (s, 3H). <sup>13</sup>C NMR (175 MHz, Chloroform-*d*) δ 168.4, 164.8, 158.7, 136.6, 136.3, 135.9, 135.3, 134.0, 130.3, 129.7, 129.1, 128.73, 128.66, 128.44, 128.41, 128.38, 128.0, 127.3, 125.5, 121.3, 116.6, 77.4, 71.7, 15.4. HRMS (ESI-TOF) *m/z* [M + Na]<sup>+</sup> Calcd for C<sub>30</sub>H<sub>22</sub>BrN<sub>3</sub>O<sub>2</sub> 558.0788; found 558.0792.

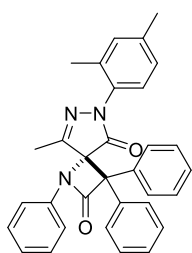

**6-(2,4-dimethylphenyl)-8-methyl-1,3,3-triphenyl-1,6,7-triazaspiro[3.4]oct-7-ene-2,5-dione (3n):** The residue was purified by a silica gel flash chromatography (PE/EA = 80/1) giving the product **3n** as a white solid in 87% yield (42.1 mg), m. p. = 192.5 – 194.2 °C. <sup>1</sup>H NMR (700 MHz, Chloroform-*d*) δ 7.64 (d, *J* = 7.7 Hz, 2H), 7.52 (dd, *J* = 8.4, 1.4 Hz, 2H), 7.33 (t, *J* = 7.7 Hz, 2H), 7.29 – 7.19 (m, 7H), 7.19 – 7.14 (m, 2H), 7.10 – 7.05 (m, 1H), 7.01 (d, *J* = 5.6 Hz, 2H), 2.26 (s, 3H), 2.14 (s, 3H), 1.37 (s, 3H). <sup>13</sup>C NMR (175 MHz, Chloroform-*d*) δ 168.4, 164.9, 158.5, 138.6, 136.7, 136.3, 135.3, 134.4, 133.3, 132.0, 129.6, 129.1, 128.4, 128.0, 127.4, 127.3, 125.44, 125.35, 125.3, 116.6, 76.9, 71.7, 21.1, 18.6, 15.5. HRMS (ESI-TOF) *m/z* [M + Na]<sup>+</sup> Calcd for C<sub>32</sub>H<sub>27</sub>N<sub>3</sub>O<sub>2</sub>Na 508.1996; found 508.2003.

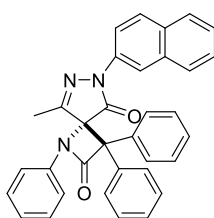

**8-methyl-6-(naphthalen-2-yl)-1,3,3-triphenyl-1,6,7-triazaspiro[3.4]oct-7-ene-2,5-dione (3o) :** The residue was purified by a silica gel flash chromatography (PE/EA = 80/1) giving the product **3o** as a white solid in 80% yield (40.4 mg), m. p. 170.6 – 173.7 °C. <sup>1</sup>H NMR (600 MHz, Chloroform-*d*) δ 8.34 (d, *J* = 1.8 Hz, 1H), 8.07 (dd, *J* = 9.0, 1.8 Hz, 1H), 7.91 (d, *J* = 9.0 Hz, 1H), 7.87 – 7.82 (t, *J* = 7.2 Hz, 2H), 7.68 (d, *J* = 7.2 Hz, 2H), 7.61 (d, *J* = 7.2 Hz, 2H), 7.52 – 7.43 (m, 2H), 7.37 (t, *J* = 7.8 Hz, 2H), 7.34 – 7.24 (m, 8H), 7.11 (t, *J* = 7.2 Hz, 1H), 1.48 (s, 3H). <sup>13</sup>C NMR (150 MHz, Chloroform-*d*) 168.0, 164.6, 158.9, 136.7, 136.6, 136.2, 135.4, 133.5, 131.2, 129.7, 129.2, 129.1, 128.6, 128.5, 128.3, 128.1, 127.7, 127.3, 127.1, 126.8, 125.7, 125.5, 117.8, 116.6, 115.6, 77.4, 72.9, 15.5. HRMS (ESI-TOF) *m/z* [M + Na]<sup>+</sup> Calcd for C<sub>34</sub>H<sub>25</sub>N<sub>3</sub>O<sub>2</sub>Na 530.1839; found 530.1831.

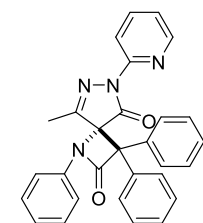

**8-methyl-1,3,3-triphenyl-6-(pyridin-2-yl)-1,6,7-triazaspiro[3.4]oct-7-ene-2,5-dione (3p):** The residue was purified by a silica gel flash chromatography (PE/EA = 20/1) giving the product **3p** as a white solid in 95% yield (43.5 mg), m. p. 162.7 – 165.0 °C. <sup>1</sup>H NMR (600 MHz, Chloroform-*d*) δ 8.55 (dd, *J* = 4.8, 1.2 Hz, 1H), 7.79 (d, *J* = 8.4 Hz, 1H), 7.72 – 7.66 (m, 1H), 7.61 (d, *J* = 6.6 Hz, 2H), 7.51 (d, *J* = 7.2 Hz, 2H), 7.28 (t, *J* = 7.2 Hz, 2H), 7.25 – 7.18 (m, 8H), 7.14 (dd, *J* = 7.2, 4.8 Hz, 1H), 7.04 (t, *J* = 7.2 Hz, 1H), 1.45 (s, 3H). <sup>13</sup>C NMR (150 MHz, Chloroform-*d*) δ 168.6, 164.4, 160.0, 149.2, 148.9, 138.6, 136.5, 136.3, 136.1, 129.7, 129.2, 128.64, 128.57, 128.3, 127.2, 127.1, 125.5, 121.4, 116.5, 114.0, 77.8, 73.0, 15.7. HRMS (ESI-TOF) *m/z* [M + Na]<sup>+</sup> Calcd for C<sub>29</sub>H<sub>22</sub>N<sub>4</sub>O<sub>2</sub>Na 481.1635; found 481.1629.

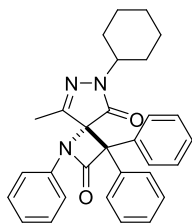

**6-cyclohexyl-8-methyl-1,3,3-triphenyl-1,6,7-triazaspiro[3.4]oct-7-ene-2,5-dione (3q):** The residue was purified by a silica gel flash chromatography (PE/EA = 100/1) giving the product **3q** as a white solid in 82% yield (37.8 mg), m. p. 209.3 – 211.0 °C. <sup>1</sup>H NMR (600 MHz, Chloroform-*d*) δ 7.58 (d, *J* = 7.2 Hz, 2H), 7.52 (d, *J* = 7.8 Hz, 2H), 7.34 (t, *J* = 7.2 Hz, 2H), 7.28 (q, *J* = 7.2 Hz, 5H), 7.23 (d, 6.6 Hz, 1H), 7.16 (d, *J* = 8.4 Hz, 2H), 7.09 (t, *J* = 7.2 Hz, 1H), 4.11 – 4.03 (m, 1H), 2.00 – 1.95 (m, 1H), 1.91 (d, *J* = 10.2 Hz, 2H), 1.89 – 1.78 (m, 3H), 1.70 (d, *J* = 11.4 Hz, 1H), 1.45 – 1.34 (m, 2H), 1.31 (s, 3H), 1.28 – 1.19 (m, 1H). <sup>13</sup>C NMR (150 MHz, Chloroform-*d*) δ 168.8, 164.8, 157.0, 136.9, 136.8, 136.2, 129.5, 129.0, 128.4, 128.2, 128.1, 127.3, 127.0, 125.2, 116.4, 76.1, 71.9, 53.4, 31.1, 30.4, 25.5, 25.4, 25.2, 15.3. HRMS (ESI-TOF) *m/z* [M + Na]<sup>+</sup> Calcd for C<sub>30</sub>H<sub>29</sub>N<sub>3</sub>O<sub>2</sub>Na 486.2152; found 486.2144.

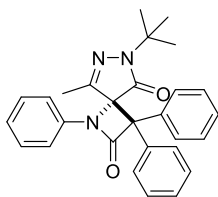

**6-(tert-butyl)-8-methyl-1,3,3-triphenyl-1,6,7-triazaspiro[3.4]oct-7-ene-2,5-dione (3r):** The residue was purified by a silica gel flash chromatography (PE/EA = 60/1) giving the product **3r** as a white solid in 80% yield (36.4 mg), m. p. 160.7 – 161.6 °C. <sup>1</sup>H NMR (600 MHz, Chloroform-*d*) δ 7.54 (d, *J* = 6.6 Hz, 2H), 7.51 (dd, *J* = 8.4, 1.2 Hz, 2H), 7.27 (t, *J* = 7.2 Hz, 2H), 7.24 – 7.19 (m, 5H), 7.18 – 7.13 (m, 1H), 7.14 – 7.09 (m, 2H), 7.03 (t, *J* = 7.8 Hz, 1H), 1.48 (s, 9H), 1.24 (s, 3H). <sup>13</sup>C NMR (150 MHz, Chloroform-*d*) δ 170.2, 164.9, 155.7, 137.2, 136.9, 136.6, 129.5, 129.0, 128.3, 128.2, 128.0, 127.2, 127.0, 125.1, 116.5, 76.0, 72.4, 58.1, 28.0, 15.4. HRMS (ESI-TOF) *m/z* [M + Na]<sup>+</sup> calcd for C<sub>28</sub>H<sub>27</sub>N<sub>3</sub>O<sub>2</sub>Na 460.1996; found 460.2002.

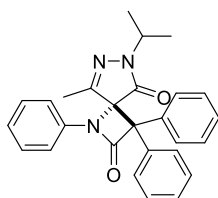

**6-isopropyl-8-methyl-1,3,3-triphenyl-1,6,7-triazaspiro[3.4]oct-7-ene-2,5-dione (3s):** The residue was purified by a silica gel flash chromatography (PE/EA = 60/1) giving the product **3s** as a white solid in 72% yield (30.5 mg), m. p. 198.4 – 200.6 °C. <sup>1</sup>H NMR (600 MHz, Chloroform-*d*) δ 7.52 (d, *J* = 7.8 Hz, 2H), 7.48 – 7.44 (m, 2H), 7.28 (t, *J* = 7.8 Hz, 2H), 7.25 – 7.20 (m, 5H), 7.18 – 7.15 (m, 1H), 7.10 (d, *J* = 7.8 Hz, 2H), 7.04 (t, *J* = 7.2 Hz, 1H), 4.43 – 4.37 (m, 1H), 1.41 (d, *J* = 6.6 Hz, 3H), 1.30 (d, *J* = 6.6 Hz, 3H), 1.27 (s, 3H). <sup>13</sup>C NMR (150 MHz, Chloroform-*d*) δ 168.9, 164.8, 157.2, 136.9, 136.8, 136.2, 129.5, 129.1, 128.4, 128.3, 128.1, 127.3, 127.0, 125.2, 116.5, 76.2, 72.0, 46.2, 20.8, 20.2, 15.3. HRMS (ESI-TOF) *m/z* [M + Na]<sup>+</sup> Calcd for C<sub>27</sub>H<sub>25</sub>N<sub>3</sub>O<sub>2</sub>Na 446.1839; found 446.1838.

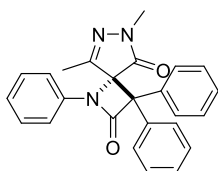

**6,8-dimethyl-1,3,3-triphenyl-1,6,7-triazaspiro[3.4]oct-7-ene-2,5-dione (3t):** The residue was purified by a silica gel flash chromatography (PE/EA = 60/1) giving the product **3t** as a white solid in 76% yield (30.1 mg), m. p. 167.8 – 169.6 °C. <sup>1</sup>H NMR (700 MHz, Chloroform-*d*) δ 7.62 (d, *J* = 6.3 Hz, 2H), 7.55 – 7.51 (m, 2H), 7.36 (t, *J* = 7.7 Hz, 2H), 7.32 – 7.28 (m, 5H), 7.27 – 7.24 (m, 1H), 7.19 (dd, *J* = 8.4, 1.4 Hz, 2H), 7.12 (t, *J* = 7.7 Hz, 1H), 3.44 (s, 3H), 1.33 (s, 3H). <sup>13</sup>C NMR (175 MHz, Chloroform-*d*) δ 169.9, 164.8, 157.9, 136.72, 136.68, 136.0, 129.6, 129.1, 128.5, 128.3, 128.2, 127.4, 127.1, 125.3, 116.5, 76.4, 71.4, 32.3, 15.2. HRMS (ESI-TOF) *m/z* [M + Na]<sup>+</sup> Calcd for C<sub>25</sub>H<sub>21</sub>N<sub>3</sub>O<sub>2</sub>Na 418.1526; found 418.1534.



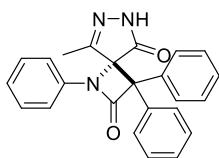

**8-methyl-1,3,3-triphenyl-1,6,7-triazaspiro[3.4]oct-7-ene-2,5-dione (3u):** The residue was purified by a silica gel flash chromatography (PE/EA = 50/1) giving the product **3u** as a white solid in 87% yield (33.2 mg), m. p. 173.2 – 177.9 °C. <sup>1</sup>H NMR (600 MHz, Chloroform-*d*) δ 8.67 (s, 1H), 7.66 (d, *J* = 7.2 Hz, 2H), 7.63 (d, *J* = 7.2 Hz, 2H), 7.39 (t, *J* = 7.8 Hz, 2H), 7.37 – 7.32 (m, 5H), 7.30 – 7.25 (m, 3H), 7.16 (t, *J* = 7.2 Hz, 1H), 1.36 (s, 3H). <sup>13</sup>C NMR (150 MHz, Chloroform-*d*) δ 172.5, 164.7, 159.1, 136.59, 136.56, 135.8, 129.7, 129.1, 128.5, 128.4, 128.2, 127.4, 127.0, 125.4, 116.5, 76.7, 70.5, 15.4. HRMS (ESI-TOF) *m/z* [M + Na]<sup>+</sup> Calcd for C<sub>25</sub>H<sub>19</sub>N<sub>3</sub>O<sub>2</sub>Na 404.1370; found 404.1376.

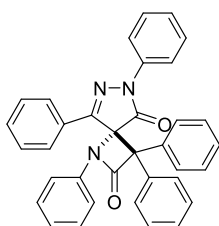

**1,3,3,6,8-pentaphenyl-1,6,7-triazaspiro[3.4]oct-7-ene-2,5-dione (3v):** The residue was purified by a silica gel flash chromatography (PE/EA = 80/1) giving the product **3v** as a white solid in 95% yield (49.5 mg), m. p. 203.8-205.0 °C. <sup>1</sup>H NMR (700 MHz, Chloroform-*d*) δ 7.98 – 7.92 (t, *J* = 7.0 Hz, 2H), 7.66 (t, *J* = 7.0 Hz, 2H), 7.52 (t, *J* = 6.3 Hz, 2H), 7.47 (d, *J* = 8.4 Hz, 4H), 7.35 (t, *J* = 6.3 Hz, 2H), 7.33 – 7.27 (m, 3H), 7.27 – 7.24 (m, 3H), 7.14 – 7.09 (t, *J* = 7.0 Hz, 1H), 7.10 – 7.05 (t, *J* = 7.0 Hz, 1H), 7.02 (t, *J* = 7.7 Hz, 2H), 6.94 (m, 2H), 6.89 (t, *J* = 7.7 Hz, 1H). <sup>13</sup>C NMR (175 MHz, Chloroform-*d*) δ 168.3, 164.7, 155.0, 137.7, 137.2, 136.6, 136.0, 130.9, 123.0, 129.7, 129.2, 128.6, 128.4, 128.2, 128.1, 127.8, 127.3, 126.9, 126.4, 125.8, 125.5, 118.7, 117.1, 78.8, 72.7. HRMS (ESI-TOF) *m/z* [M + Na]<sup>+</sup> Calcd for C<sub>35</sub>H<sub>25</sub>N<sub>3</sub>O<sub>2</sub>Na 542.1839; found 542.1845.

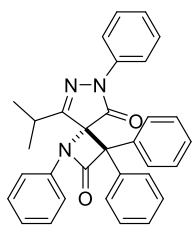

**8-isopropyl-1,3,3-triphenyl-1,6,7-triazaspiro[3.4]oct-7-ene-2,5-dione (3x):** The residue was purified by a silica gel flash chromatography (PE/EA = 80/1) giving the product **3x** as a white solid in 93% yield (45.4 mg), m. p. 165.1 – 167.3 °C, <sup>1</sup>H NMR (600 MHz, Chloroform-*d*) δ 7.85 (d, *J* = 8.4 Hz, 2H), 7.59 (s, 2H), 7.52 – 7.47 (m, 2H), 7.38 (t, *J* = 7.8 Hz, 2H), 7.28 (t, *J* = 7.2 Hz, 2H), 7.24 – 7.13 (m, 9H), 7.02 (t, *J* = 7.8 Hz, 1H), 1.65 – 1.56 (m, 1H). 0.88 (d, *J* = 6.6 Hz, 3H), 0.63 (d, *J* = 6.6 Hz, 3H). <sup>13</sup>C NMR (150 MHz, Chloroform-*d*) δ 167.9, 165.3, 164.9, 138.0, 137.2, 136.8, 136.7, 129.4, 129.13, 129.10, 128.5, 128.4, 128.1, 127.2, 127.1, 125.5, 125.3, 118.4, 117.1, 77.4, 73.1, 29.7, 22.2, 19.3. HRMS (ESI-TOF) *m/z* [M + Na]<sup>+</sup> Calcd for C<sub>32</sub>H<sub>27</sub>N<sub>3</sub>O<sub>2</sub>Na 508.1996; found 508.1991.

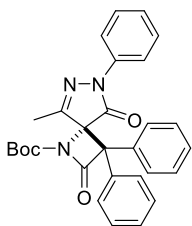

**tert-butyl 5-methyl-2,8-dioxo-3,3,7-triphenyl-1,6,7-triazaspiro[3.4]oct-5-ene-1-carboxylate (3y):** The residue was purified by a silica gel flash chromatography (PE/EA = 80/1) giving the product **3y** as a white solid in 23% yield (11.2 mg), m. p. 153.4 – 156.1 °C. <sup>1</sup>H NMR (600 MHz, DMSO-*d*<sub>6</sub>) δ 7.71 (d, *J* = 7.2 Hz, 2H), 7.54 (d, *J* = 7.2 Hz, 4H), 7.50 (t, *J* = 7.8 Hz, 2H), 7.45 (t, *J* = 7.2 Hz, 1H), 7.39 (t, *J* = 7.2 Hz, 2H), 7.35 (t, *J* = 7.8 Hz, 2H), 7.30 (q, *J* = 7.2 Hz, 2H), 1.40 (s, 3H), 1.31 (s, 9H). <sup>1</sup>H NMR (600 MHz, Chloroform-*d*<sub>6</sub>) δ 7.73 (d, *J* = 7.2 Hz, 2H), 7.48 (d, *J* = 7.2 Hz, 2H), 7.44 (d, *J* = 7.2 Hz, 2H), 7.34 (t, *J* = 7.8 Hz, 2H), 7.28 (t, *J* = 7.8 Hz, 2H), 7.23 (t, *J* = 7.8 Hz, 3H), 7.20 (d, *J* = 7.2 Hz, 1H), 7.15 (t, *J* = 7.2 Hz, 1H), 1.40 (s, 3H), 1.31 (s, 9H). <sup>13</sup>C NMR (150 MHz, DMSO-*d*) δ 168.6, 157.1, 137.6, 136.4, 136.3, 130.0, 129.7, 129.3, 129.2, 128.6, 126.9, 126.7, 126.2, 118.9, 85.8, 76.2, 71.2, 27.6, 14.9. HRMS (ESI-TOF) *m/z* [M + Na]<sup>+</sup> Calcd for C<sub>29</sub>H<sub>27</sub>N<sub>3</sub>O<sub>4</sub>Na 504.1894, found 504.1900.

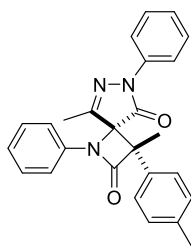

**3,8-dimethyl-1,6-diphenyl-3-(p-tolyl)-1,6,7-triazaspiro[3.4]oct-7-ene-2,5-dione**

**(3z):** The residue was purified by a silica gel flash chromatography (PE/EA = 60/1) giving the product **3z** as a white solid in 45% yield (18.6 mg), m. p. 133.2 – 135.4 °C. <sup>1</sup>H NMR (600 MHz, Chloroform-*d*) δ 8.02 (dd, *J* = 7.8, 1.2 Hz, 2H), 7.50 – 7.45 (m, 3H), 7.30 – 7.25 (m, 3H), 7.19 – 7.13 (m, 4H), 7.10 (t, *J* = 7.2 Hz, 2H), 2.34 (s, 3H), 1.91 (s, 3H), 1.28 (s, 3H). <sup>13</sup>C NMR (150 MHz, Chloroform-*d*) δ 168.3, 166.7, 159.6, 138.4, 138.1, 136.8, 134.7, 129.8, 129.7, 129.2, 125.9, 125.7, 125.3, 118.7, 116.3,

71.8, 68.9, 21.5, 21.3, 14.9. HRMS (ESI-TOF) *m/z* [M + Na]<sup>+</sup> Calcd for C<sub>26</sub>H<sub>23</sub>N<sub>3</sub>O<sub>2</sub>Na 432.1683, found 432.1687.

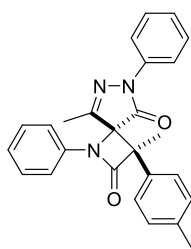

**3,8-dimethyl-1,6-diphenyl-3-(p-tolyl)-1,6,7-triazaspiro[3.4]oct-7-ene-2,5-dione**

**(3z')**: The residue was purified by a silica gel flash chromatography (PE/EA = 60/1) giving the product **3z'** as a white solid in 35% yield (14.2 mg), m. p. 172.3 – 176.4 °C. <sup>1</sup>H NMR (600 MHz, Chloroform-*d*) δ 7.67 (dd, *J* = 8.4, 1.2 Hz, 2H), 7.40 – 7.35 (m, 2H), 7.30 (t, *J* = 7.8 Hz, 2H), 7.25 – 7.15 (m, 5H), 7.13 – 7.07 (m, 3H), 2.36 (s, 3H), 2.32 (s, 3H), 1.94 (s, 3H). <sup>13</sup>C NMR (150 MHz, Chloroform-*d*) δ 168.3, 167.0, 157.0, 138.1, 137.6, 136.8, 134.4, 129.7, 129.5, 129.1, 125.9, 125.5, 125.2, 118.6, 116.5,

72.8, 70.5, 22.9, 21.3, 16.9. HRMS (ESI-TOF) *m/z* [M + Na]<sup>+</sup> Calcd for C<sub>26</sub>H<sub>23</sub>N<sub>3</sub>O<sub>2</sub>Na 432.1683; found 432.1692.

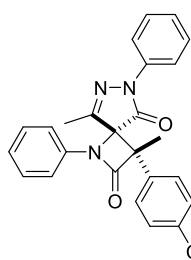

**3-(4-chlorophenyl)-3,8-dimethyl-1,6-diphenyl-1,6,7-triazaspiro[3.4]oct-7-ene-2,5-dione (3aa)**

The residue was purified by a silica gel flash chromatography (PE/EA = 50/1) giving the product **3aa** as a white solid in 54% yield (23.2 mg), m. p. 153.9 – 155.1 °C. <sup>1</sup>H NMR (700 MHz, Chloroform-*d*) δ 7.59 (dd, *J* = 8.4, 0.7 Hz, 2H), 7.34 – 7.29 (m, 2H), 7.27 – 7.16 (m, 6H), 7.13 (t, *J* = 7.0 Hz, 1H), 7.11 – 7.07 (m, 2H), 7.05 (t, *J* = 7.0 Hz, 1H), 2.28 (s, 3H), 1.86 (s, 3H). <sup>13</sup>C NMR (175 MHz, Chloroform-*d*) δ 168.0, 166.3, 156.7, 137.4, 136.5, 135.9, 134.3, 129.73,

129.70, 129.1, 128.9, 125.6, 125.4, 118.4, 116.4, 72.5, 69.7, 22.7, 16.9. HRMS (ESI-TOF) *m/z* [M + Na]<sup>+</sup> Calcd for C<sub>25</sub>H<sub>20</sub>N<sub>3</sub>O<sub>2</sub>Na 452.1137; found 452.1143.

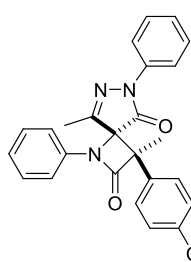

**3-(4-chlorophenyl)-3,8-dimethyl-1,6-diphenyl-1,6,7-triazaspiro[3.4]oct-7-ene-2,5-dione (3aa')**

The residue was purified by a silica gel flash chromatography (PE/EA = 50/1) giving the product **3aa'** as a white solid in 42% yield (18.1 mg), m. p. 166.0 – 167.3 °C. <sup>1</sup>H NMR (700 MHz, Chloroform-*d*) δ 7.95 (d, *J* = 7.7 Hz, 2H), 7.45 – 7.39 (m, 3H), 7.30 (d, *J* = 9.1 Hz, 2H), 7.25 – 7.19 (m, 3H), 7.09 (d, *J* = 8.4 Hz, 2H), 7.05 (t, *J* = 7.7 Hz, 2H), 1.84 (s, 3H), 1.27 (s, 3H). <sup>13</sup>C NMR (175 MHz, Chloroform-*d*) δ 167.9, 166.0, 159.0, 137.9, 136.5, 136.2, 134.5, 129.7,

129.5, 129.2, 127.4, 125.8, 125.4, 118.6, 116.3, 71.5, 68.0, 21.6, 14.8. HRMS (ESI-TOF) *m/z* [M + Na]<sup>+</sup> Calcd for C<sub>25</sub>H<sub>20</sub>N<sub>3</sub>O<sub>2</sub>Na 452.1137; found 452.1135.

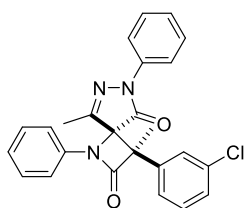

**3-(3-chlorophenyl)-3,8-dimethyl-1,6-diphenyl-1,6,7-triazaspiro[3.4]oct-7-ene-2,5-dione (3bb):** The residue was purified by a silica gel flash chromatography (PE/EA = 50/1) giving the product **3bb** as a white solid in 56% yield (24.1 mg), m. p. 173.2 – 177.9 °C. m. p. 142.6 – 144.9 °C. <sup>1</sup>H NMR (600 MHz, Chloroform-*d*) δ 7.65 (d, *J* = 8.4 Hz, 2H), 7.38 (t, *J* = 7.8 Hz, 3H), 7.31 – 7.15 (m, 8H), 7.12 (t, *J* = 7.8 Hz, 1H), 2.36 (s, 3H), 1.94 (s, 3H). <sup>13</sup>C NMR (150 MHz, Chloroform-*d*) δ 168.0, 166.0, 156.6, 139.3, 137.2, 136.5, 134.7, 130.0, 129.7, 129.0, 128.6, 126.3, 125.7, 125.4, 124.2, 118.6, 116.4, 72.4, 69.7, 22.6, 16.8. HRMS (ESI-TOF) *m/z* [M + Na]<sup>+</sup> Calcd for C<sub>25</sub>H<sub>20</sub>ClN<sub>3</sub>O<sub>2</sub>Na 452.1137; found 452.1133.

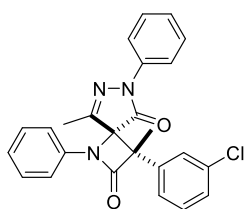

**3-(3-chlorophenyl)-3,8-dimethyl-1,6-diphenyl-1,6,7-triazaspiro[3.4]oct-7-ene-2,5-dione (3bb'):** The residue was purified by a silica gel flash chromatography (PE/EA = 50/1) giving the product **3bb'** as a white solid in 40% yield (17.3 mg), m. p. 190.1 – 192.3 °C. <sup>1</sup>H NMR (600 MHz, Chloroform-*d*) δ 8.02 (d, *J* = 7.8 Hz, 2H), 7.48 (t, *J* = 7.8 Hz, 3H), 7.33 (m, 2H), 7.30 (m, 3H), 7.16 (d, *J* = 8.4 Hz, 2H), 7.12 (t, *J* = 7.2 Hz, 2H), 1.92 (s, 3H), 1.35 (s, 3H). <sup>13</sup>C NMR (150 MHz, Chloroform-*d*) δ 167.9, 165.8, 158.9, 139.7, 138.0, 136.6, 135.4, 130.7, 129.8, 129.3, 128.8, 126.3, 125.9, 125.5, 124.3, 118.8, 116.4, 71.5, 68.1, 21.5, 14.9. HRMS (ESI-TOF) *m/z* [M + Na]<sup>+</sup> Calcd for C<sub>25</sub>H<sub>20</sub>ClN<sub>3</sub>O<sub>2</sub>Na 452.1137; found 452.1141.

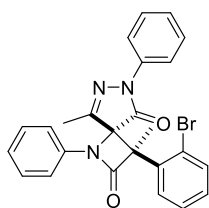

**3-(2-bromophenyl)-3,8-dimethyl-1,6-diphenyl-1,6,7-triazaspiro[3.4]oct-7-ene-2,5-dione (3cc):** The residue was purified by a silica gel flash chromatography (PE/EA = 50/1) giving the product **3cc** as a white solid in 38% yield (17.8 mg), m. p. 128.3 – 129.9 °C. <sup>1</sup>H NMR (600 MHz, Chloroform-*d*) δ 8.02 (dd, *J* = 7.8, 1.8 Hz, 1H), 7.97 (dd, *J* = 8.4, 1.2 Hz, 2H), 7.59 (dd, *J* = 7.8, 0.6 Hz, 1H), 7.46 (d, *J* = 8.4 Hz, 2H), 7.39 – 7.32 (m, 1H), 7.33 – 7.22 (m, 3H), 7.26 – 7.16 (m, 3H), 7.11 (t, *J* = 7.2 Hz, 1H), 2.17 (s, 3H), 1.40 (s, 3H). <sup>13</sup>C NMR (150 MHz, Chloroform-*d*) δ 167.4, 167.1, 157.2, 138.0, 136.6, 134.9, 130.1, 129.8, 129.2, 129.0, 128.2, 125.8, 125.5, 122.0, 119.0, 116.6, 70.3, 68.5, 17.9, 14.4. HRMS (ESI-TOF) *m/z* [M + Na]<sup>+</sup> Calcd for C<sub>25</sub>H<sub>20</sub>BrN<sub>3</sub>O<sub>2</sub>Na 496.0632; found 496.0641.

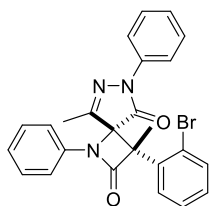

**3-(2-bromophenyl)-3,8-dimethyl-1,6-diphenyl-1,6,7-triazaspiro[3.4]oct-7-ene-2,5-dione (3cc'):** The residue was purified by a silica gel flash chromatography (PE/EA = 50/1) giving the product **3cc'** as a white solid in 40% yield (19.2 mg), m. p. 186.0 – 187.5 °C. <sup>1</sup>H NMR (600 MHz, Chloroform-*d*) δ 8.03 (dd, *J* = 7.8, 1.8 Hz, 1H), 7.78 (d, *J* = 7.2 Hz, 2H), 7.47 (d, *J* = 7.2 Hz, 1H), 7.42 – 7.38 (m, 2H), 7.35 (t, *J* = 7.2 Hz, 1H), 7.29 (t, *J* = 7.8 Hz, 2H), 7.22 (d, *J* = 7.2 Hz, 3H), 7.17 – 7.10 (m, 2H), 2.40 (s, 3H), 2.14 (s, 3H). <sup>13</sup>C NMR (150 MHz, Chloroform-*d*) δ 167.19, 167.15, 155.6, 137.6, 136.5, 136.2, 134.0, 129.68, 129.65, 129.0, 127.8, 125.6, 125.4, 121.5, 118.8, 116.6, 71.7, 69.7, 20.5, 17.0. HRMS (ESI-TOF) *m/z* [M + Na]<sup>+</sup> Calcd for C<sub>25</sub>H<sub>20</sub>BrN<sub>3</sub>O<sub>2</sub>Na 496.0632; found 496.0633.

The isomers **3dd/3dd'** can't be separated neither by flash chromatography nor by HPLC chromatography. The individual yield of **3dd/3dd'** was calculated by <sup>1</sup>H NMR.

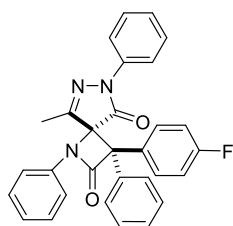

**3-(4-fluorophenyl)-8-methyl-1,3,6-triphenyl-1,6,7-triazaspiro[3.4]oct-7-ene-2,5-dione (3dd):** The mixture of isomers was purified by a silica gel flash chromatography (PE/EA = 80/1) giving the product **3dd/3dd'** as a white solid in 84% total yield (individual yield was calculated by <sup>1</sup>H NMR, **3dd**, 46% yield, 22.1 mg). <sup>1</sup>H NMR (600 MHz, Chloroform-*d*)  $\delta$  7.80 (t,  $J = 7.2$  Hz, 4H), 7.65 – 7.52 (m, 4H), 7.41 – 7.34 (m, 4H), 7.28 – 7.22 (m, 3H), 7.05 (t,  $J = 7.2$  Hz, 2H), 6.92 (t,  $J = 9.0$  Hz, 2H), 1.37 (s, 3H). <sup>13</sup>C NMR (150 MHz, Chloroform-*d*)  $\delta$  167.6, 164.4, 162.4 (d,  $J_{C,F} = 246.8$  Hz), 158.7, 137.7, 136.5, 132.6, 131.9, 129.8, 129.3 (d,  $J_{C,F} = 8.7$  Hz), 129.2 (d,  $J_{C,F} = 4.0$  Hz), 128.4, 127.2, 127.0, 125.7, 125.6, 118.4, 116.5, 115.6 (d,  $J_{C,F} = 21.6$  Hz), 76.6, 72.7, 15.4. HRMS (ESI-TOF)  $m/z$  [M + Na]<sup>+</sup> Calcd for C<sub>30</sub>H<sub>22</sub>FN<sub>3</sub>O<sub>2</sub>Na 498.1589; found 498.1589.

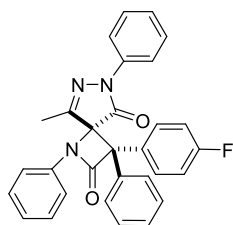

**3-(4-fluorophenyl)-8-methyl-1,3,6-triphenyl-1,6,7-triazaspiro[3.4]oct-7-ene-2,5-dione (3dd')**: The mixture of isomers was purified by a silica gel flash chromatography (PE/EA = 80/1) giving the product **3dd/3dd'** as a white solid in 84% total yield (individual yield was calculated by <sup>1</sup>H NMR, **3dd'**, 38% yield, 18.3 mg). <sup>1</sup>H NMR (600 MHz, Chloroform-*d*)  $\delta$  7.53 – 7.44 (m, 5H), 7.30 (t,  $J = 7.2$  Hz, 3H), 7.18 – 7.14 (m, 9H), 6.99 (t,  $J = 8.4$  Hz, 2H), 1.42 (s, 3H). <sup>13</sup>C NMR (150 MHz, Chloroform-*d*)  $\delta$  167.6, 164.4, 162.5 (d,  $J_{C,F} = 247.8$  Hz), 158.3, 136.5, 136.4, 136.1, 132.6, 131.9, 129.3 (d,  $J_{C,F} = 2.0$  Hz), 129.0, 128.9, 128.6 (d,  $J_{C,F} = 15.3$  Hz), 128.4, 127.2, 125.64, 125.59, 116.5, 116.2 (d,  $J_{C,F} = 21.6$  Hz), 76.6, 72.7, 15.6. HRMS (ESI-TOF)  $m/z$  [M + Na]<sup>+</sup> Calcd for C<sub>30</sub>H<sub>22</sub>FN<sub>3</sub>O<sub>2</sub>Na 498.1589; found 498.1589.

The isomers **3ee/3ee'** can't be separated neither by flash chromatography nor by HPLC chromatography. The individual yield of **3ee/3ee'** was calculated by <sup>1</sup>H NMR. NMR spectra of **3ee'** can't be obtained due to overlap of NMR signals.

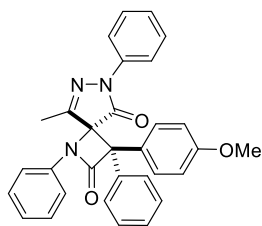

**3-(4-methoxyphenyl)-8-methyl-1,3,6-triphenyl-1,6,7-triazaspiro[3.4]oct-7-ene-2,5-dione (3ee):** The mixture of isomers was purified by a silica gel flash chromatography (PE/EA = 80/1) giving the product **3ee/3ee'** as a white solid in 78% total yield (individual yield was calculated by <sup>1</sup>H NMR, **3ee**, 65% yield, 38.5 mg; **3ee'**, 13% yield, 7.7 mg). <sup>1</sup>H NMR (600 MHz, Chloroform-*d*)  $\delta$  7.80 (d,  $J = 7.2$  Hz, 2H), 7.55 (d,  $J = 6.6$  Hz, 2H), 7.48 (d,  $J = 7.2$  Hz, 1H), 7.41 (d,  $J = 9.0$  Hz, 2H), 7.38 – 7.32 (m, 3H), 7.27 (t,  $J = 7.2$  Hz, 2H), 7.23 – 7.18 (m, 4H), 7.02 (t,  $J = 7.2$  Hz, 1H), 6.74 (d,  $J = 9.0$  Hz, 2H), 3.65 (s, 3H), 1.35 (s, 3H). <sup>13</sup>C NMR (150 MHz, Chloroform-*d*)  $\delta$  167.7, 164.9, 159.3, 158.9, 137.9, 136.9, 136.6, 129.7, 129.17, 129.16, 128.8, 128.6, 128.38, 128.36, 128.0, 127.1, 127.0, 125.6, 125.4, 77.2, 72.8, 55.2, 15.4. HRMS (ESI-TOF)  $m/z$  [M + Na]<sup>+</sup> Calcd for C<sub>31</sub>H<sub>25</sub>N<sub>3</sub>O<sub>3</sub>Na 510.1789; found 510.1788.

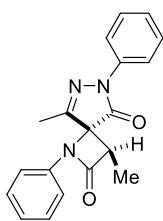

**3,8-dimethyl-1,6-diphenyl-1,6,7-triazaspiro[3.4]oct-7-ene-2,5-dione (3ff):** The residue was purified by a silica gel flash chromatography (PE/EA = 100/1) giving the product **3ff** as a white solid in 75% yield (23.8 mg), m. p. 97.2 – 103.4 °C. <sup>1</sup>H NMR (600 MHz, Chloroform-*d*) δ 7.92 (d, *J* = 7.2 Hz, 2H), 7.39 (t, *J* = 7.2 Hz, 2H), 7.24 – 7.18 (m, 3H), 7.03 (t, *J* = 7.8 Hz, 1H), 3.77 (q, *J* = 7.8 Hz, 1H), 2.17 (s, 3H), 1.40 (d, *J* = 7.8 Hz, 3H). <sup>13</sup>C NMR (150 MHz, Chloroform-*d*) δ 169.1, 165.5, 157.2, 137.7, 136.8, 129.7, 129.1, 125.7, 125.1, 118.5, 115.9, 67.2, 56.7, 15.7, 10.1. HRMS (ESI-TOF) *m/z* [M + Na]<sup>+</sup> Calcd for C<sub>19</sub>H<sub>17</sub>N<sub>3</sub>O<sub>2</sub>Na 342.1213; found 342.1220.

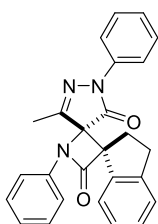

**3''-methyl-1',1''-diphenyl-2,3-dihydrodispiro[indene-1,3'-azetidine-2',4''-pyrazole]-4',5''(1''H)-dione (3gg):** The residue was purified by a silica gel flash chromatography (PE/EA = 80/1) giving the product **3gg** as a white solid in 64% yield (25.6 mg), m. p. 189.1 – 191.2 °C. <sup>1</sup>H NMR (600 MHz, Chloroform-*d*) δ 7.81 – 7.75 (m, 1H), 7.67 (d, *J* = 7.2 Hz, 2H), 7.37 – 7.31 (m, 4H), 7.30 – 7.26 (m, 2H), 7.24 (d, *J* = 7.8 Hz, 2H), 7.23 – 7.18 (m, 1H), 7.15 (t, *J* = 7.8 Hz, 2H), 3.00 – 2.88 (m, 2H), 2.76 (dt, *J* = 13.8, 9.0 Hz, 1H), 2.68 – 2.62 (m, 1H), 2.33 (s, 3H). <sup>13</sup>C NMR (150 MHz, Chloroform-*d*) δ 167.02, 166.96, 157.9, 144.8, 137.7, 136.6, 135.8, 129.7, 129.6, 128.9, 128.0, 126.1, 125.4, 125.3, 124.4, 118.5, 116.5, 77.8, 73.1, 30.9, 30.9, 16.1. HRMS (ESI-TOF) *m/z* [M + Na]<sup>+</sup> Calcd for C<sub>26</sub>H<sub>21</sub>N<sub>3</sub>O<sub>2</sub>Na 430.1526; found 430.1536.

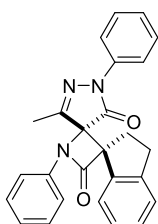

**3''-methyl-1',1''-diphenyl-2,3-dihydrodispiro[indene-1,3'-azetidine-2',4''-pyrazole]-4',5''(1''H)-dione (3gg')**: The residue was purified by a silica gel flash chromatography (PE/EA = 80/1) giving the product **3gg'** as a white solid in 30% yield (12.2 mg), m. p. 136.9 – 142.7 °C. <sup>1</sup>H NMR (600 MHz, Chloroform-*d*) δ 7.86 (d, *J* = 7.2 Hz, 2H), 7.45 (d, *J* = 7.2 Hz, 1H), 7.41 – 7.34 (t, *J* = 7.2 Hz, 2H), 7.24 (t, *J* = 7.8 Hz, 3H), 7.20 (m, 1H), 7.18 – 7.14 (m, 2H), 7.13 (d, *J* = 7.2 Hz, 2H), 7.06 (t, *J* = 7.2 Hz, 1H), 3.04 (dd, *J* = 14.4, 6.0 Hz, 1H), 2.71 (m, 1H), 2.69 – 2.60 (m, 1H), 2.53 – 2.44 (m, 1H), 1.81 (s, 3H). <sup>13</sup>C NMR (150 MHz, Chloroform-*d*) δ 169.4, 166.7, 157.8, 146.2, 137.8, 137.4, 136.9, 129.8, 129.7, 129.1, 126.1, 125.8, 125.7, 125.4, 125.2, 118.6, 116.3, 77.9, 77.3, 73.5, 31.8, 30.7, 16.6. HRMS (ESI-TOF) *m/z* [M + Na]<sup>+</sup> Calcd for C<sub>26</sub>H<sub>21</sub>N<sub>3</sub>O<sub>2</sub>Na 430.1526; found 430.1530.

## 4. Scale-up synthesis of product 3a

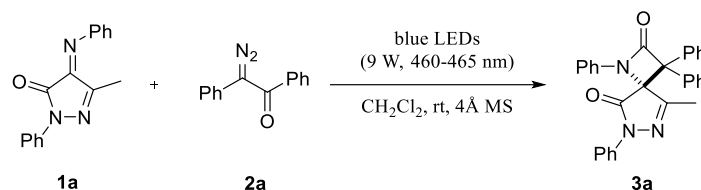

Pyrazolone-derived phenyl ketimines **1a** (3.0 mmol, 1.0 equiv.) and  $\alpha$ -diazoketones **2a** (6.0 mmol, 2.0 equiv.) were dissolved in  $\text{CH}_2\text{Cl}_2$  (3 mL). At room temperature, the reaction mixture was then irradiated under blue LEDs for hours until the complete consumption of **1a** (monitored by TLC). The reaction mixture was concentrated and the residue was purified by flash chromatography on silica gel (PE/EA = 80/1) to give the pure product **3a** in 80% (1.1 g) isolated yield.

## 5. Synthesis of other spiro- $\beta$ -lactams and deprotection of *N*-Boc group of products 5 and 8

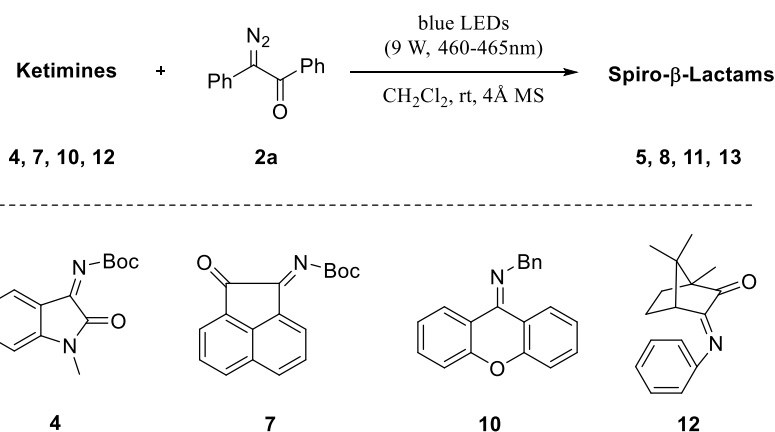

Other ketimines **4, 7, 10 or 12** (0.1 mmol, 1.0 equiv.) and  $\alpha$ -diazoketone **2a** (0.2 mmol, 2.0 equiv.) were dissolved in  $\text{CH}_2\text{Cl}_2$  (1.0 mL). At room temperature, the reaction mixture was then irradiated under blue LEDs for hours until the complete consumption of **4 or 7** (monitored by TLC). The reaction mixture was concentrated and the residue was purified by flash chromatography on silica gel (petroleum ether /ethyl acetate = 80:1) to give the pure products **5, 8, 11 or 13**.

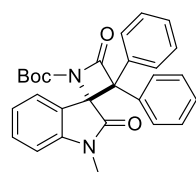

*tert*-butyl-1'-methyl-2',4-dioxo-3,3-diphenylspiro[azetidine-2,3'-indoline]-1-carboxylate (**5**): The residue was purified by a silica gel flash chromatography (PE/EA = 10/1) giving the product **5** as a white solid in 84% yield (38.1 mg), m. p. 178.2 – 179.6 °C.  $^1\text{H}$  NMR (600 MHz, Chloroform-*d*)  $\delta$  7.44 (d,  $J$  = 7.2 Hz, 2H), 7.32 – 7.28 (m, 1H), 7.28 – 7.20 (m, 5H), 7.20 – 7.17 (m, 3H). 6.90 (d,  $J$  = 7.2 Hz, 1H), 6.70 (t,  $J$  = 7.2 Hz, 1H), 6.12 (d,  $J$  = 7.2 Hz, 1H). 3.25 (s, 3H), 1.25 (s, 9H).  $^{13}\text{C}$  NMR (150 MHz,

Chloroform-*d*)  $\delta$  173.0, 166.3, 144.5, 137.6, 137.1, 130.5, 128.52, 128.49, 128.04, 128.00, 127.7, 126.5, 126.2, 123.4, 122.2, 108.3, 84.2, 75.5, 69.4, 27.8, 26.8. HRMS (ESI-TOF)  $m/z$   $[M + Na]^+$  Calcd for  $C_{28}H_{26}N_2O_4Na$  477.1785; found 477.1794.

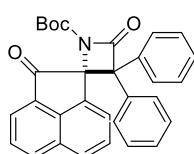

***tert-butyl 2,4'-dioxo-3,3'-diphenyl-2H-spiro[acenaphthylene-1,2'-azetidine]-1'-carboxylate (8)***: The residue was purified by a silica gel flash chromatography (PE/EA = 10/1) giving the product **8** as a white solid in 96% yield (45.6 mg), m. p. 174.1 – 175.6 °C.  $^1H$  NMR (600 MHz, Chloroform-*d*)  $\delta$  8.18 (d,  $J$  = 8.4 Hz, 1H), 8.02 (d,  $J$  = 7.8 Hz, 1H), 7.87 (d,  $J$  = 7.8 Hz, 1H), 7.80 (t,  $J$  = 8.4 Hz, 1H), 7.33 (d,  $J$  = 7.8 Hz, 3H), 7.20 (m, 3H), 7.16 (m, 5H). 6.45 (d,  $J$  = 6.6 Hz, 1H), 1.02 (s, 9H).  $^{13}C$  NMR (150 MHz, Chloroform-*d*)  $\delta$  199.1, 166.7, 142.0, 137.6, 137.5, 133.3, 132.2, 131.9, 130.7, 128.51, 128.47, 128.4, 128.09, 128.05, 128.0, 127.5, 127.2, 126.1, 123.1, 122.2, 84.0, 76.1, 73.4, 27.5. HRMS (ESI-TOF)  $m/z$   $[M + Na]^+$  Calcd for  $C_{31}H_{25}NO_4Na$  498.1676; found 498.1668.

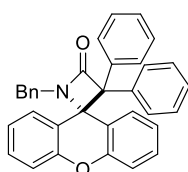

***1-benzyl-3,3-diphenylspiro[azetidine-2,9'-xanthen]-4-one (11)***: The residue was purified by a silica gel flash chromatography (PE/EA = 80/1) giving the product **11** as a white solid in 74% yield (35.7 mg), m. p. 226.5 – 228.4 °C.  $^1H$  NMR (600 MHz, Chloroform-*d*)  $\delta$  7.25 – 7.21 (m, 6H), 7.21 – 7.16 (m, 5H), 7.14 (t,  $J$  = 7.2 Hz, 2H), 6.98 – 6.91 (m, 6H), 6.54 – 6.46 (m, 4H), 4.44 (s, 2H).  $^{13}C$  NMR (150 MHz, Chloroform-*d*)  $\delta$  170.4, 152.5, 139.2, 136.2, 129.5, 129.2, 128.5, 128.4, 127.9, 127.6, 127.3, 126.2, 122.4, 119.5, 116.2, 81.9, 68.8, 44.9. HRMS (ESI-TOF)  $m/z$   $[M + Na]^+$  Calcd for  $C_{34}H_{25}NO_2Na$  502.1778; found 502.1788.

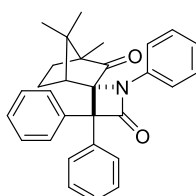

***4',7',7'-trimethyl-1,3,3-triphenylspiro[azetidine-2,2'-bicyclo[2.2.1]heptane]-3',4'-dione (13)***: The residue was purified by a silica gel flash chromatography (PE/EA = 80/1) giving the product **13** as a white solid in 90% yield (39.0 mg), m. p. 215.7 – 218.5 °C.  $^1H$  NMR (600 MHz, Chloroform-*d*)  $\delta$  7.63 (d,  $J$  = 7.8 Hz, 2H), 7.53 (d,  $J$  = 6.6 Hz, 2H), 7.43 (t,  $J$  = 7.8 Hz, 2H), 7.41 (d,  $J$  = 4.2 Hz, 4H), 7.39 – 7.34 (m, 4H), 7.30 (t,  $J$  = 7.2 Hz, 1H), 2.89 (d,  $J$  = 4.8 Hz, 1H), 1.88 – 1.79 (m, 1H), 1.68 – 1.62 (m, 1H), 1.58 – 1.54 (m, 2H), 0.89 (s, 3H), 0.68 (s, 3H), 0.15 (s, 3H).  $^{13}C$  NMR (150 MHz, Chloroform-*d*)  $\delta$  213.2, 170.4, 138.1, 135.8, 133.9, 130.1, 130.0, 129.4, 129.2, 128.61, 128.58, 128.2, 127.9, 127.7, 83.2, 75.0, 58.5, 49.3, 45.7, 28.2, 24.3, 22.9, 20.1, 9.6. HRMS (ESI-TOF)  $m/z$   $[M + Na]^+$  Calcd for  $C_{30}H_{29}NO_2Na$  458.2091; found 458.2083.

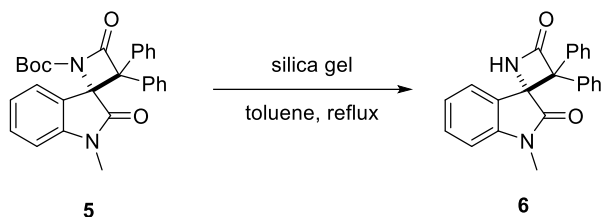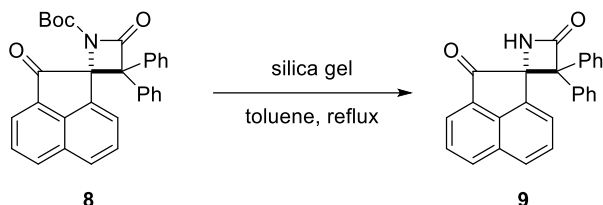

To an oven-dried 25 mL Schlenk tube equipped with a stir bar was charged with cycloadduct **5** or **8** and 1.0 g silica gel (200-300 mesh). To this mixture was added freshly distilled toluene (6 mL) and the reaction mixture was stirred under refluxing. After **5** or **8** was fully consumed, the solvent was removed under reduced pressure and the residue was purified by chromatography on silica gel (petroleum ether /ethyl acetate = 1/4) to give the corresponding product **6** or **9**.

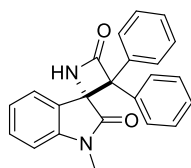

**1'-methyl-3,3-diphenylspiro[azetidine-2,3'-indoline]-2',4'-dione (6):** The residue was purified by a silica gel flash chromatography (PE/EA = 4/1) giving the product **6** as a white solid in 77% yield (54.3 mg), m. p. 192.4 – 196.6 °C. <sup>1</sup>H NMR (700 MHz, Chloroform-*d*) δ 7.38 (td, *J* = 7.7, 1.4 Hz, 2H), 7.25 – 7.20 (m, 1H), 7.19 – 7.15 (m, 4H), 7.13 – 7.08 (m, 4H), 6.82 (d, *J* = 7.7 Hz, 1H), 6.68 – 6.64 (td, *J* = 7.7, 1.4 Hz, 1H), 6.40 (s, 1H), 6.19 (dd, *J* = 8.4, 2.1 Hz, 1H), 3.15 (s, 3H). <sup>13</sup>C NMR (175 MHz, Chloroform-*d*) δ 175.5, 169.7, 143.8, 138.5, 138.1, 130.4, 128.32, 128.30, 128.0, 127.6, 127.4, 126.6, 126.4, 124.7, 122.3, 108.3, 78.6, 67.2, 26.8. HRMS (ESI-TOF) *m/z* [M + Na]<sup>+</sup> Calcd for C<sub>23</sub>H<sub>18</sub>N<sub>2</sub>O<sub>2</sub>Na 377.1261; found 377.1264.

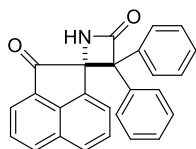

**3',3'-diphenyl-2H-spiro[acenaphthylene-1,2'-azetidine]-2,4'-dione (9):** The residue was purified by a silica gel flash chromatography (PE/EA = 5/1) giving the product **9** as a white solid in 74% yield (27.6 mg), m. p. 203.7 – 205.5 °C. <sup>1</sup>H NMR (600 MHz, Chloroform-*d*) δ 8.10 (d, *J* = 8.4 Hz, 1H), 7.89 (d, *J* = 6.6 Hz, 1H), 7.79 (d, *J* = 8.4 Hz, 1H), 7.72 (dd, *J* = 7.8, 7.2 Hz, 1H), 7.30 – 7.25 (m, 3H), 7.14 – 7.08 (m, 4H), 7.06 (d, *J* = 7.2 Hz, 4H), 6.51 (d, *J* = 7.2 Hz, 1H), 6.44 (s, 1H). <sup>13</sup>C NMR (150 MHz, Chloroform-*d*) δ 201.8, 170.0, 141.4, 138.6, 138.4, 134.3, 132.2, 131.6, 130.5, 128.5, 128.4, 128.3, 128.2, 128.0, 127.6, 127.3, 127.1, 126.0, 123.3, 122.2, 79.2, 71.4. HRMS (ESI-TOF) *m/z* [M + Na]<sup>+</sup> Calcd for C<sub>26</sub>H<sub>17</sub>NO<sub>2</sub>Na 398.1152; found 398.1155.



## 6. Synthetic transformation of spiro-pyrazolone-β-lactam 3a

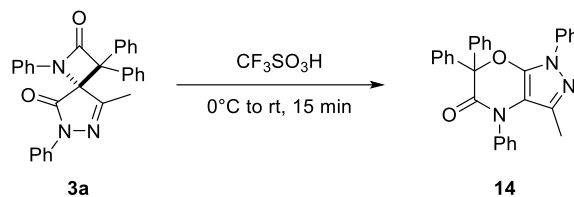

**3a** (0.1mmol, 45.7 mg) was dissolved in 1,2-dichloroethane (3 mL) and cooled to 0 °C. Trifluoromethanesulfonic acid (0.1 mmol, 8.9 μL) was then added drop-wise to the stirring solution at 0 °C. The mixture was warmed to room temperature and stirred for an additional 15 minutes. The reaction was quenched with saturated NaHCO<sub>3</sub>, extracted with ethyl acetate, dried over anhydrous Na<sub>2</sub>SO<sub>4</sub> and concentrated in vacuo to 80% of yield crude product **14** (36.6 mg).

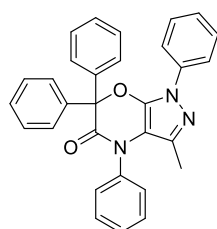

**3-methyl-1,4,6,6-tetraphenyl-1,4-dihydropyrazolo[3,4-b][1,4]oxazin-5(6H)-one (14)**: The residue was purified by a silica gel flash chromatography (PE/EA = 20/1) giving the product **14** as a white solid in 80% yield (36.6 mg), m. p. 135.1 – 136.7 °C. <sup>1</sup>H NMR (700 MHz, Chloroform-*d*) δ 7.73 (dd, *J* = 9.1, 1.4 Hz, 2H), 7.44 – 7.39 (m, 2H), 7.39 – 7.34 (m, 8H), 7.32 (t, *J* = 7.0 Hz, 1H), 7.28 – 7.24 (m, 6H), 7.20 (t, *J* = 7.7 Hz, 1H), 1.50 (s, 3H). <sup>13</sup>C NMR (175 MHz, Chloroform-*d*) δ 163.3, 140.8, 138.7, 138.0, 136.5, 136.4, 129.4, 128.9, 128.4, 128.3, 127.7, 127.5, 126.1, 119.6, 109.4, 91.7, 13.1. HRMS (ESI-TOF) *m/z* [M + Na]<sup>+</sup> Calcd for C<sub>30</sub>H<sub>23</sub>N<sub>3</sub>O<sub>2</sub>Na 480.1683; found 480.1693.

### ➤ Attempts for synthetic transformation of 3a and 14

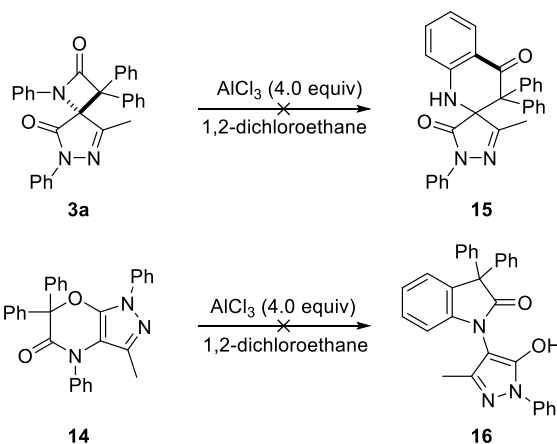

## 7. NOE experiments of products 3aa and 3aa'

The relative configurations of diastereomers **3aa** and **3aa'** can be determined by the NOE experiments, and the relative configurations of other products **3** were tentatively assigned by analogy.

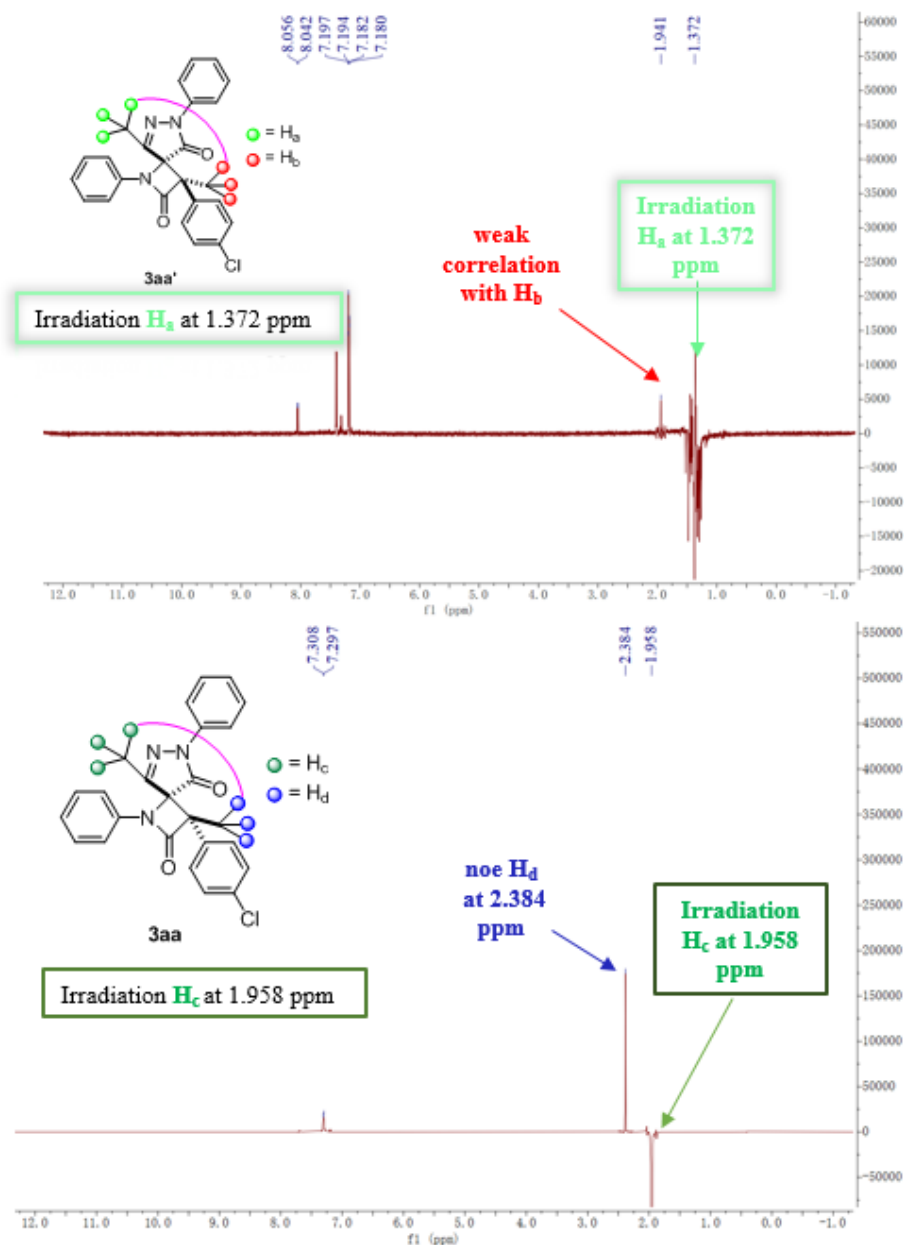

Figure S1. NOE experiments of products **3aa** and **3aa'**

## 8. X-ray crystal structure of products 3a and 14

To a 10 mL tube containing **3a** (30.0 mg) was added a mixture of solvent (petroleum ether/ethyl acetate/methylene chloride = 1:1:1, v/v/v) (6.0 mL). A clear solution was obtained through ultrasound treatment and was kept at room temperature and the crystals were obtained after the solvent evaporated, which were characterized by X-ray single crystal diffraction. X-ray diffraction experiment was carried out on an Agilent D8 QUEST and the data obtained were deposited at the Cambridge Crystallographic Data Centre.

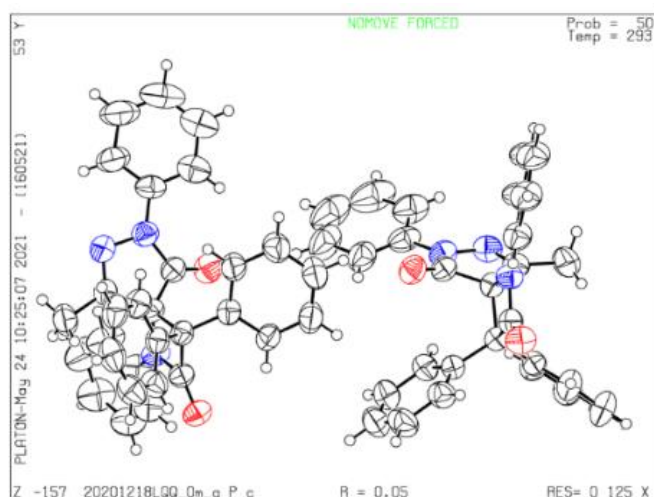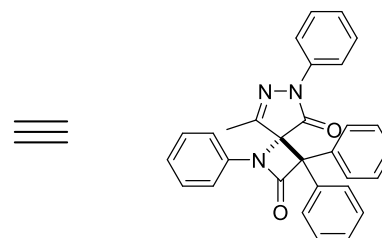

**3a**, CCDC 2162438

(Ellipsoid contour probability 50%)

|                                            |                                                               |                |
|--------------------------------------------|---------------------------------------------------------------|----------------|
| <b>Identification code</b>                 | 20201218LQQ                                                   |                |
| <b>Chemical formula</b>                    | C <sub>60</sub> H <sub>46</sub> N <sub>6</sub> O <sub>4</sub> |                |
| <b>Formula weight</b>                      | 915.03 g/mol                                                  |                |
| <b>Temperature</b>                         | 293(2) K                                                      |                |
| <b>Wavelength</b>                          | 1.54178 Å                                                     |                |
| <b>Crystal system</b>                      | monoclinic                                                    |                |
| <b>Space group</b>                         | P 1 c 1                                                       |                |
| <b>Unit cell dimensions</b>                | a = 8.6949(2) Å                                               | α = 90°        |
|                                            | b = 11.6143(3) Å                                              | β = 91.655(2)° |
|                                            | c = 24.1633(7) Å                                              | γ = 90°        |
| <b>Volume</b>                              | 2439.12(11) Å <sup>3</sup>                                    |                |
| <b>Z</b>                                   | 2                                                             |                |
| <b>Density (calculated)</b>                | 1.246 g/cm <sup>3</sup>                                       |                |
| <b>Absorption coefficient</b>              | 0.630 mm <sup>-1</sup>                                        |                |
| <b>F(000)</b>                              | 960                                                           |                |
| <b>Theta range for data collection</b>     | 3.66 to 68.40°                                                |                |
| <b>Index ranges</b>                        | -10 ≤ h ≤ 10, -14 ≤ k ≤ 14, -29 ≤ l ≤ 27                      |                |
| <b>Reflections collected</b>               | 35837                                                         |                |
| <b>Independent reflections</b>             | 8101 [R(int) = 0.0745]                                        |                |
| <b>Coverage of independent reflections</b> | 99.8%                                                         |                |

|                                         |                                                                                                                             |
|-----------------------------------------|-----------------------------------------------------------------------------------------------------------------------------|
| <b>Absorption correction</b>            | Multi-Scan                                                                                                                  |
| <b>Structure solution technique</b>     | direct methods                                                                                                              |
| <b>Structure solution program</b>       | SHELXT 2014/5 (Sheldrick, 2014)                                                                                             |
| <b>Refinement method</b>                | Full-matrix least-squares on F <sup>2</sup>                                                                                 |
| <b>Refinement program</b>               | SHELXL-2016/6 (Sheldrick, 2016)                                                                                             |
| <b>Function minimized</b>               | $\Sigma w(F_o^2 - F_c^2)^2$                                                                                                 |
| <b>Data / restraints / parameters</b>   | 8101 / 2 / 634                                                                                                              |
| <b>Goodness-of-fit on F<sup>2</sup></b> | 1.033                                                                                                                       |
| <b>Final R indices</b>                  | 5764 data; I>2 $\sigma$ (I) R1 = 0.0537, wR2 = 0.1246<br>all data R1 = 0.0798, wR2 = 0.1470                                 |
| <b>Weighting scheme</b>                 | w=1/[ $\sigma^2(F_o^2) + (0.0674P)^2 + 0.1858P$ ]<br>where P=(F <sub>o</sub> <sup>2</sup> +2F <sub>c</sub> <sup>2</sup> )/3 |
| <b>Absolute structure parameter</b>     | 0.5(3)                                                                                                                      |
| <b>Extinction coefficient</b>           | 0.0069(5)                                                                                                                   |
| <b>Largest diff. peak and hole</b>      | 0.188 and -0.155 eÅ <sup>-3</sup>                                                                                           |
| <b>R.M.S. deviation from mean</b>       | 0.046 eÅ <sup>-3</sup>                                                                                                      |

To a 10 mL tube containing **14** (30.0 mg) was added a mixture solvent (petroleum ether/ethyl acetate/methylene chloride = 1:1:2, v/v/v) (4 mL). A clear solution was obtained through ultrasound treatment and was kept at room temperature and the crystals were obtained after the solvent evaporated, which were characterized by single crystal X-ray diffraction. X-ray diffraction experiment was carried out on an Agilent D8 QUEST and the data obtained were deposited at the Cambridge Crystallographic Data Centre.

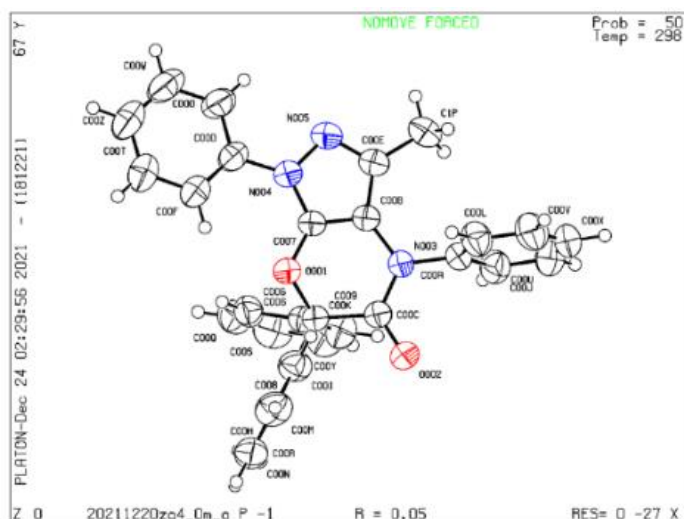

(Ellipsoid contour probability 50%)

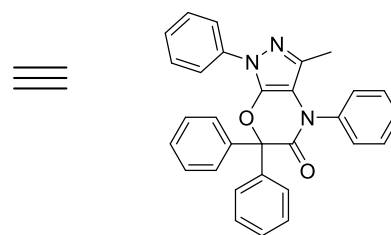

**14**, CCDC 2162437

|                            |                                                               |
|----------------------------|---------------------------------------------------------------|
| <b>Identification code</b> | 20211220zg4                                                   |
| <b>Chemical formula</b>    | C <sub>30</sub> H <sub>23</sub> N <sub>3</sub> O <sub>2</sub> |
| <b>Formula weight</b>      | 457.51 g/mol                                                  |
| <b>Temperature</b>         | 298(2) K                                                      |

|                                        |                                                                                                                                                 |
|----------------------------------------|-------------------------------------------------------------------------------------------------------------------------------------------------|
| <b>Wavelength</b>                      | 1.54178 Å                                                                                                                                       |
| <b>Crystal system</b>                  | triclinic                                                                                                                                       |
| <b>Space group</b>                     | P -1                                                                                                                                            |
| <b>Unit cell dimensions</b>            | a = 9.4208(3) Å $\alpha = 105.4940(10)^\circ$<br>b = 11.8769(3) Å $\beta = 94.3980(10)^\circ$<br>c = 12.1636(3) Å $\gamma = 109.4020(10)^\circ$ |
| <b>Volume</b>                          | 1216.38(6) Å <sup>3</sup>                                                                                                                       |
| <b>Z</b>                               | 2                                                                                                                                               |
| <b>Density (calculated)</b>            | 1.249 g/cm <sup>3</sup>                                                                                                                         |
| <b>Absorption coefficient</b>          | 0.631 mm <sup>-1</sup>                                                                                                                          |
| <b>F(000)</b>                          | 480                                                                                                                                             |
| <b>Theta range for data collection</b> | 3.83 to 68.43°                                                                                                                                  |
| <b>Index ranges</b>                    | -11<=h<=11, -14<=k<=14, -14<=l<=14                                                                                                              |
| <b>Reflections collected</b>           | 34398                                                                                                                                           |
| <b>Independent reflections</b>         | 4462 [R(int) = 0.0599]                                                                                                                          |
| <b>Structure solution technique</b>    | direct methods                                                                                                                                  |
| <b>Structure solution program</b>      | SHELXT 2014/5 (Sheldrick, 2014)                                                                                                                 |
| <b>Refinement method</b>               | Full-matrix least-squares on F <sup>2</sup>                                                                                                     |
| <b>Refinement program</b>              | SHELXL-2016/6 (Sheldrick, 2016)                                                                                                                 |
| <b>Function minimized</b>              | $\Sigma w (F_o^2 - F_c^2)^2$                                                                                                                    |
| <b>Data / restraints / parameters</b>  | 4462 / 0 / 317                                                                                                                                  |
| <b>Goodness-of-fit on F2</b>           | 1.043                                                                                                                                           |
| <b>Final R indices</b>                 | 3390 data; I>2 $\sigma$ (I)    R1 = 0.0488,    wR2 = 0.1282<br>all data                    R1 = 0.0649,    wR2 = 0.1441                         |
| <b>Weighting scheme</b>                | w=1/[ $\sigma^2(F_o^2) + (0.0763P)^2+0.1803P$ ]<br>where P=(F <sub>o</sub> <sup>2</sup> +2F <sub>c</sub> <sup>2</sup> )/3                       |
| <b>Largest diff. peak and hole</b>     | 0.217 and -0.190 eÅ <sup>-3</sup>                                                                                                               |
| <b>R.M.S. deviation from mean</b>      | 0.038 eÅ <sup>-3</sup>                                                                                                                          |

## 9. <sup>1</sup>H NMR and <sup>13</sup>C NMR spectra

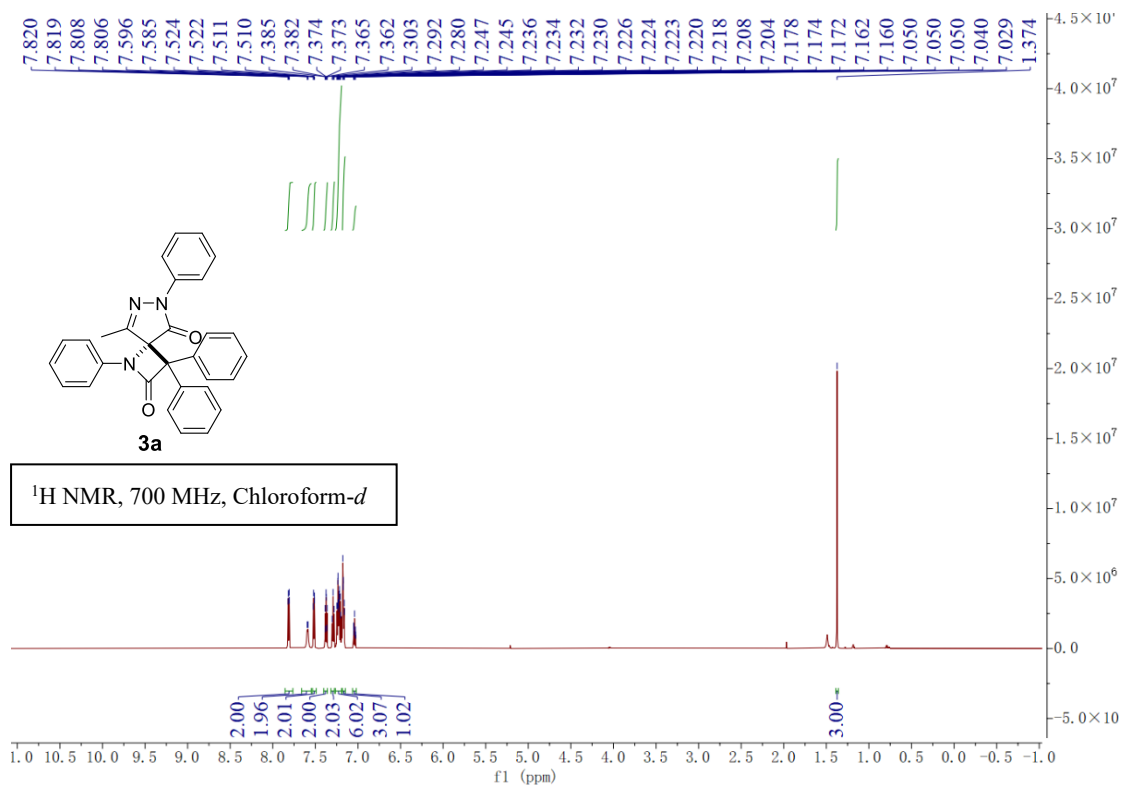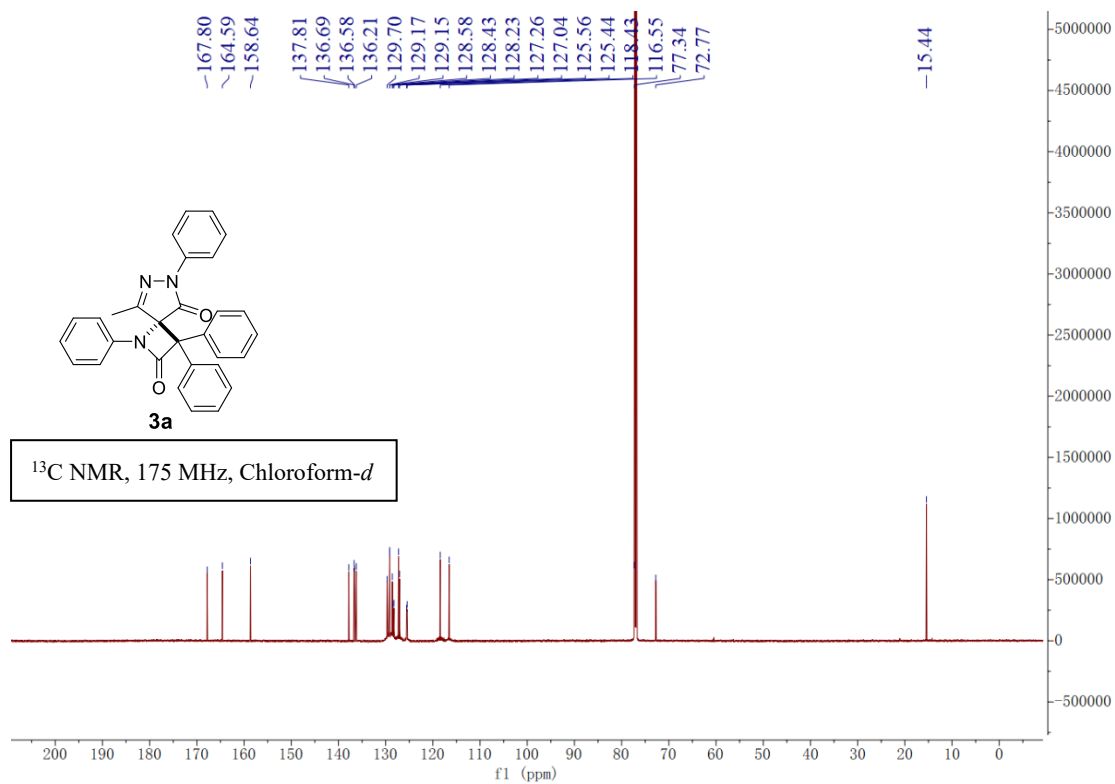

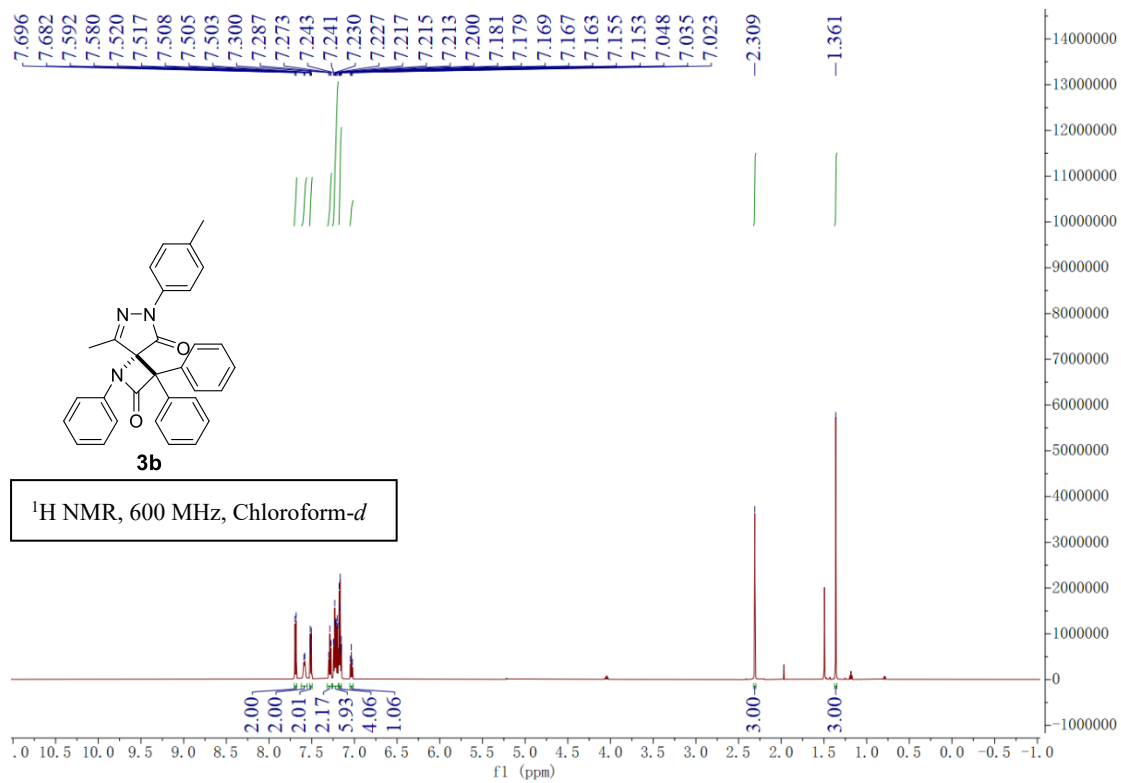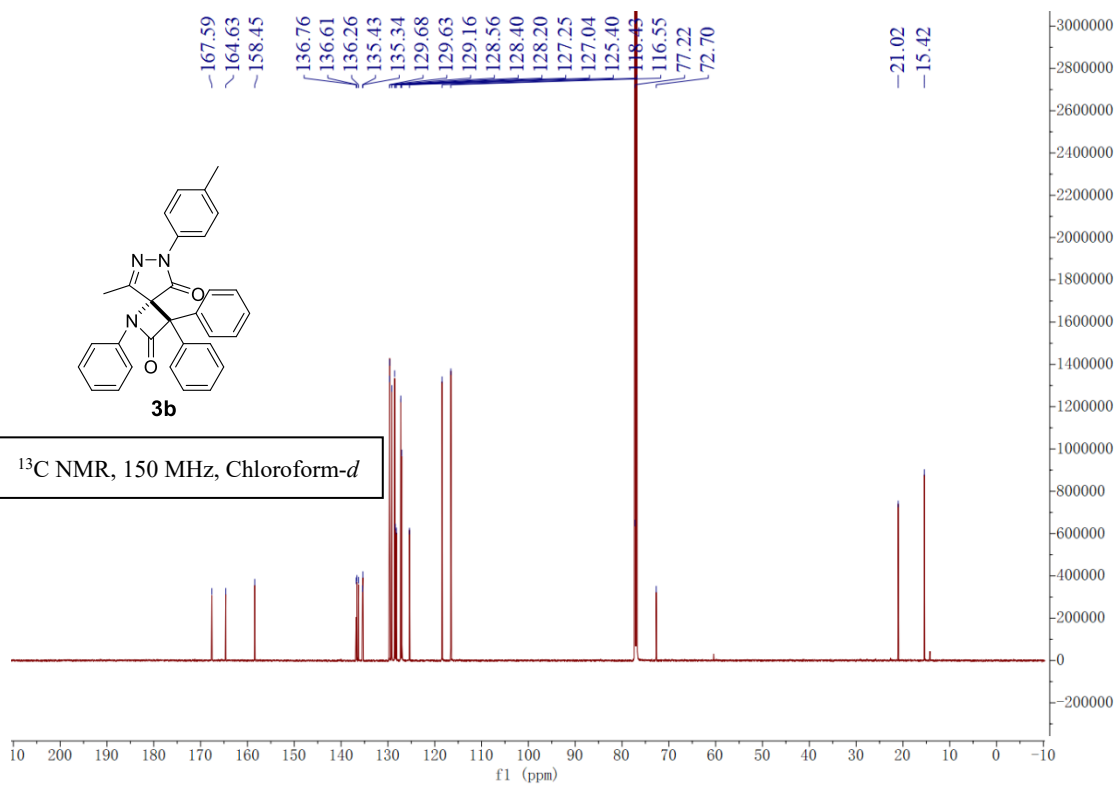

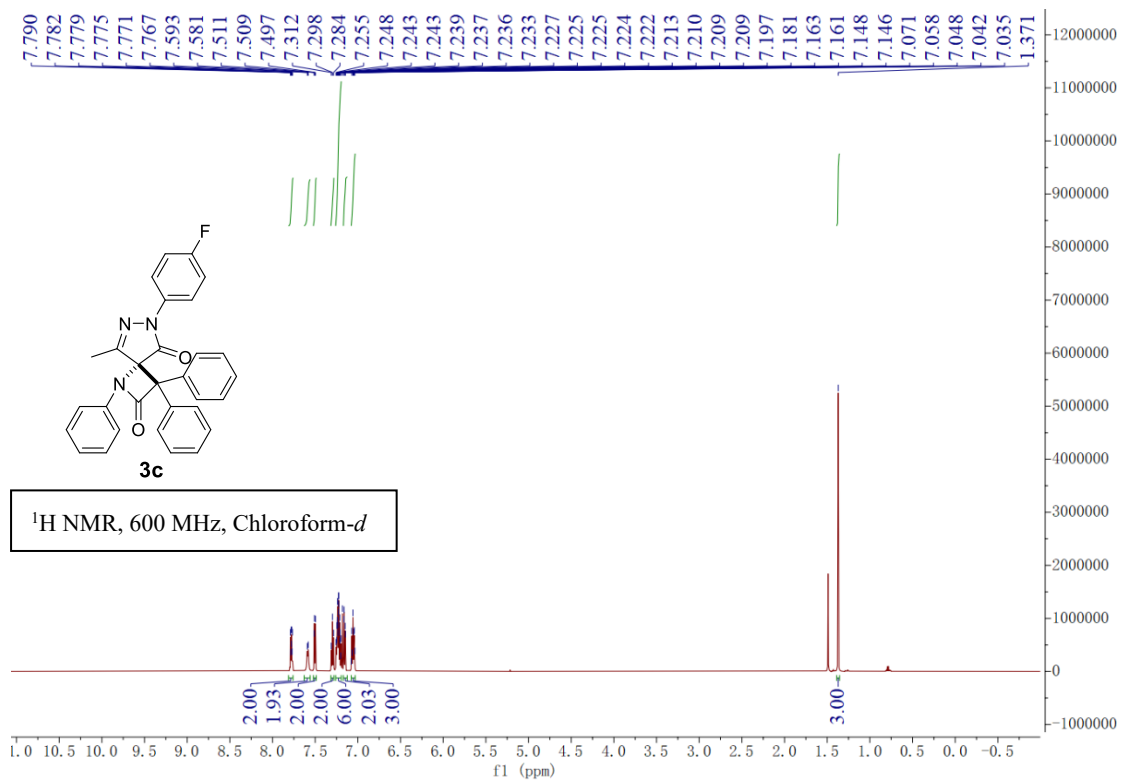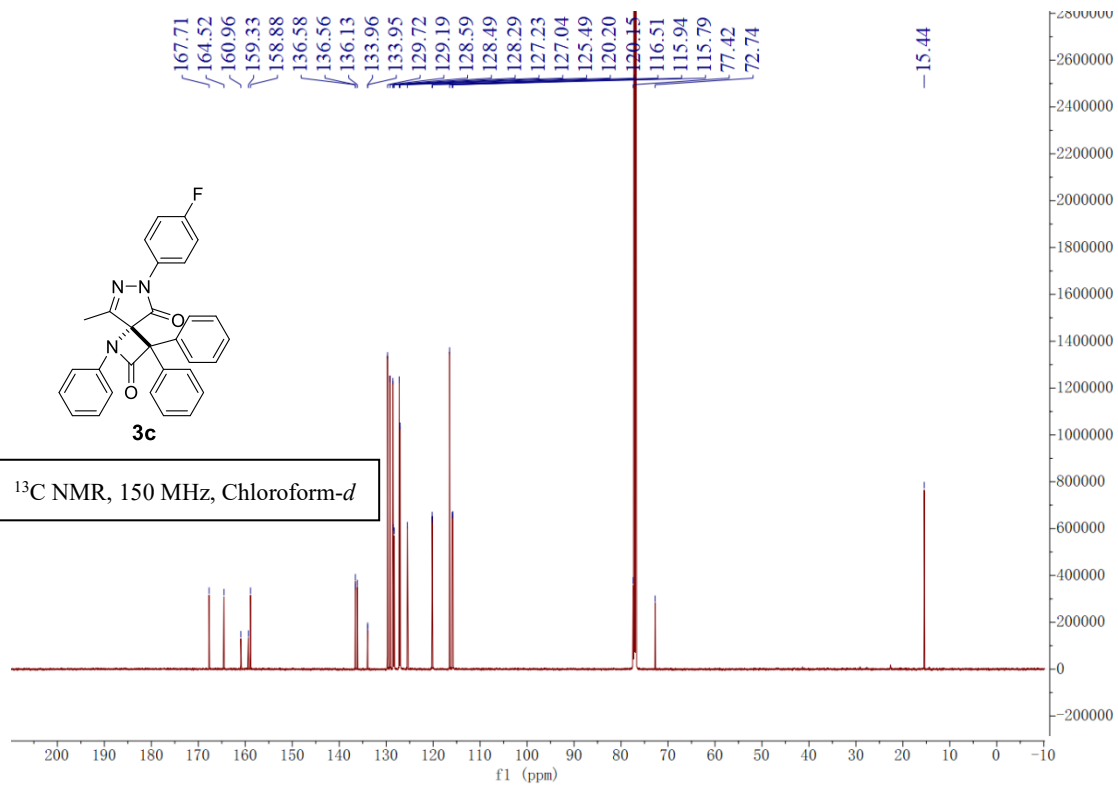



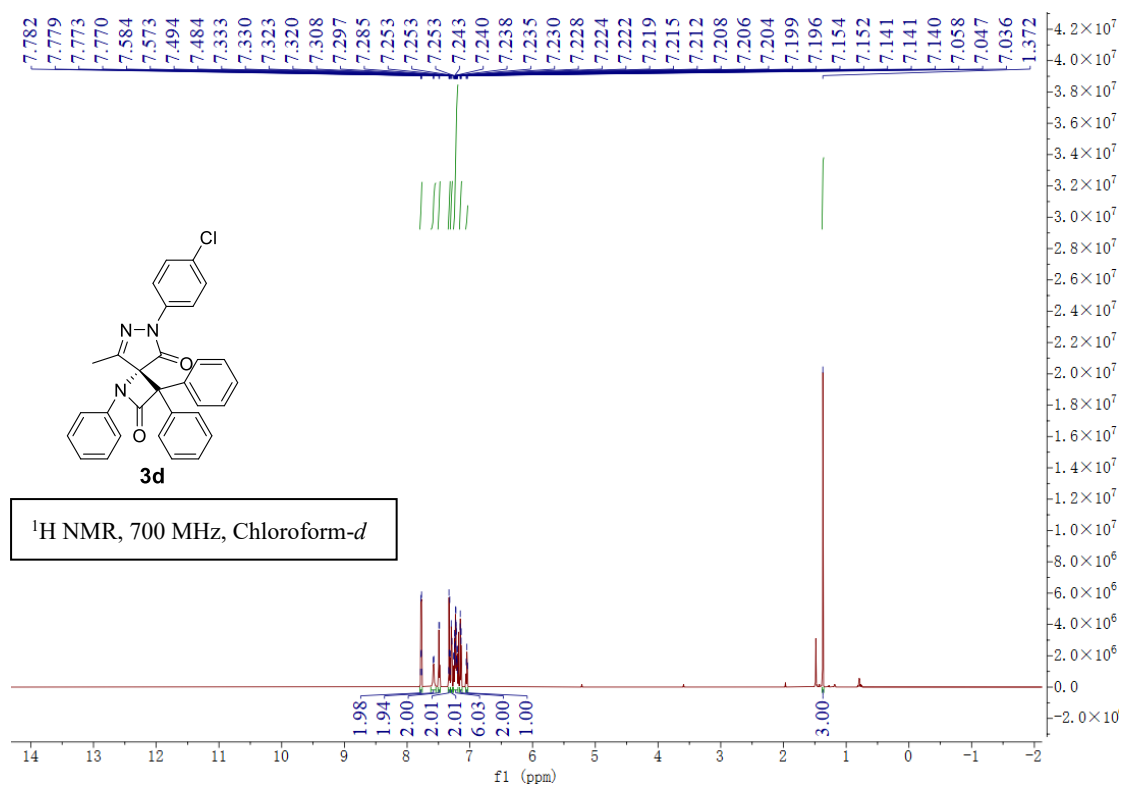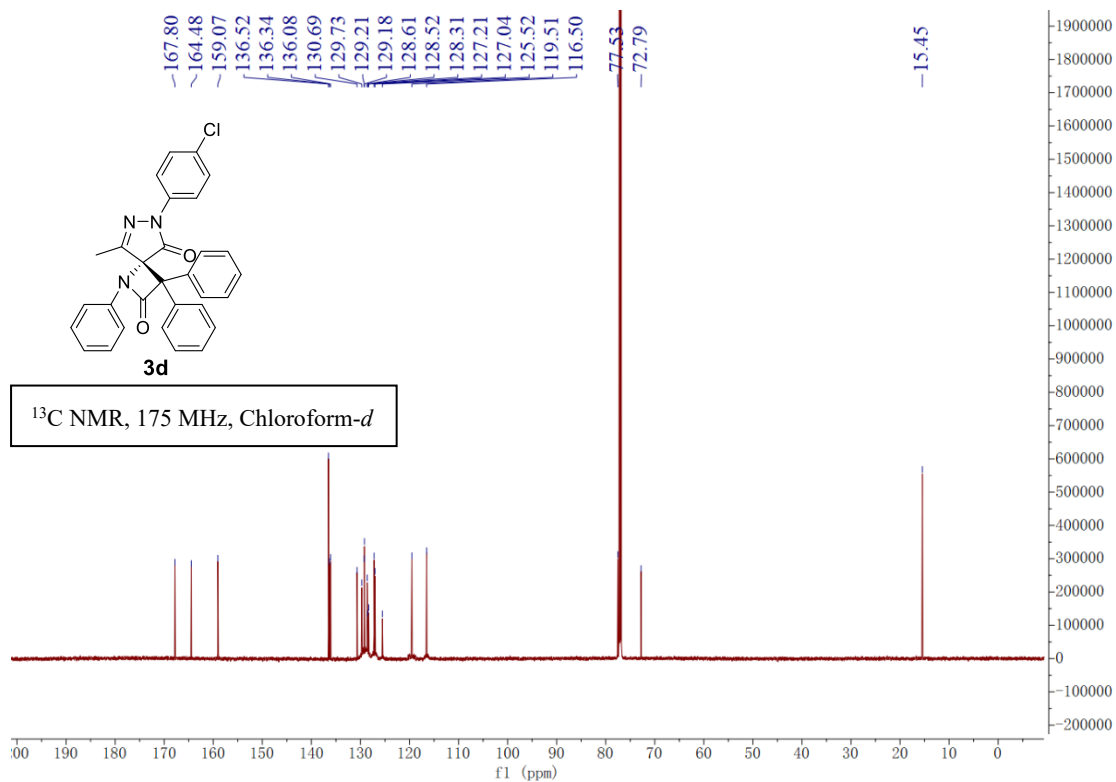

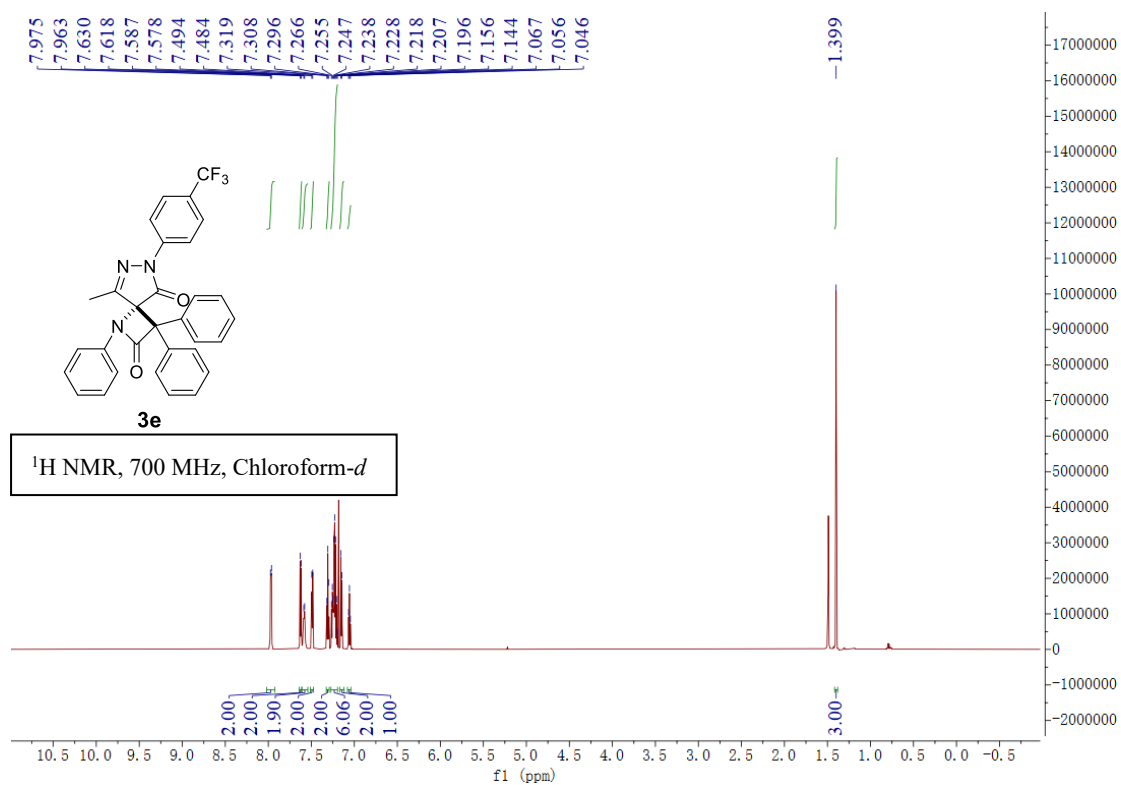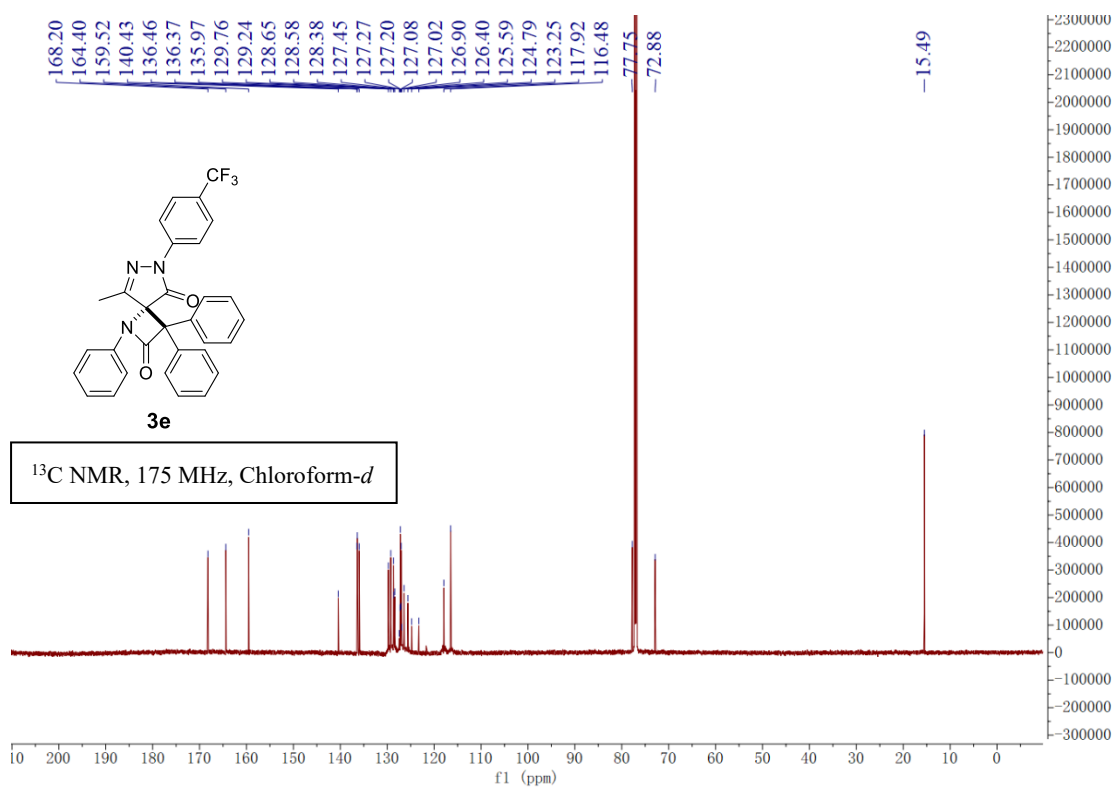

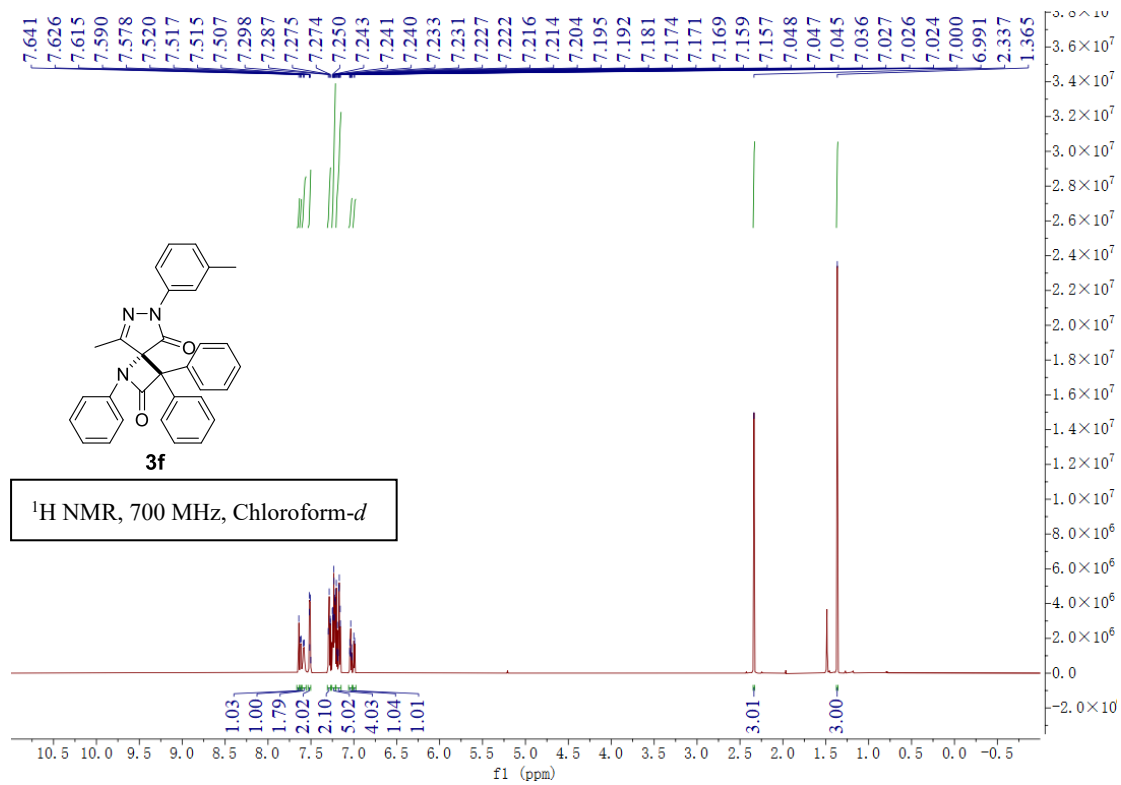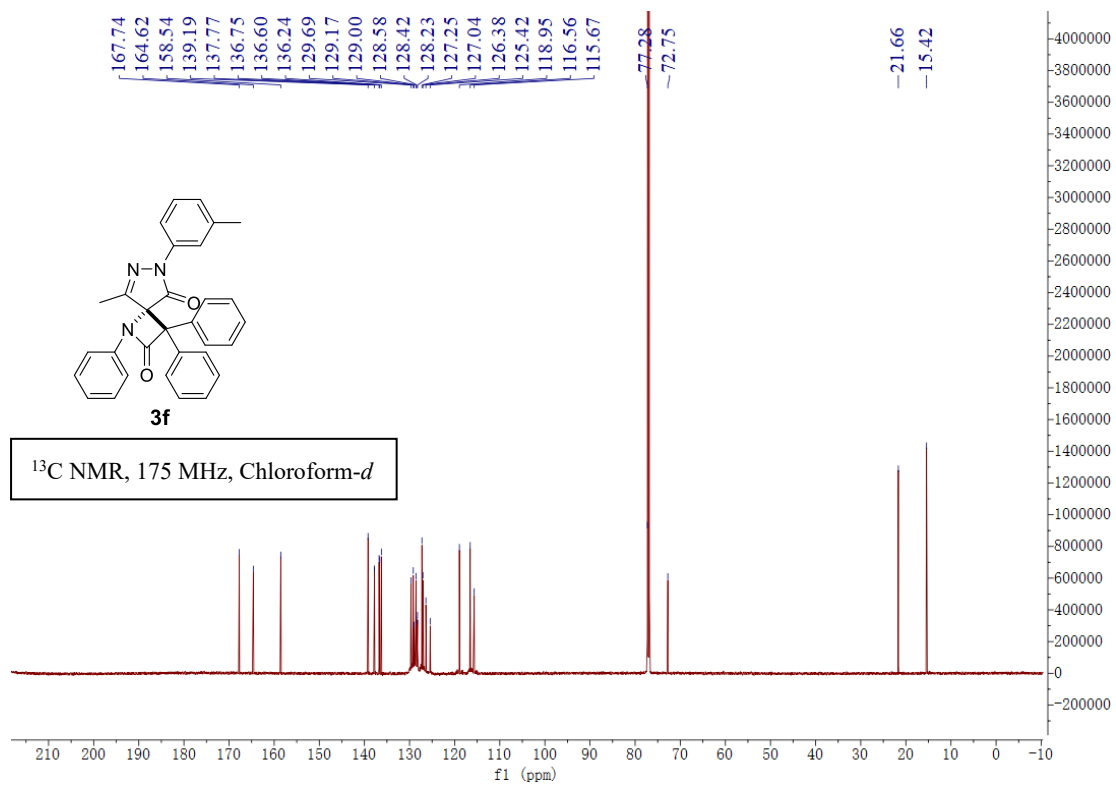

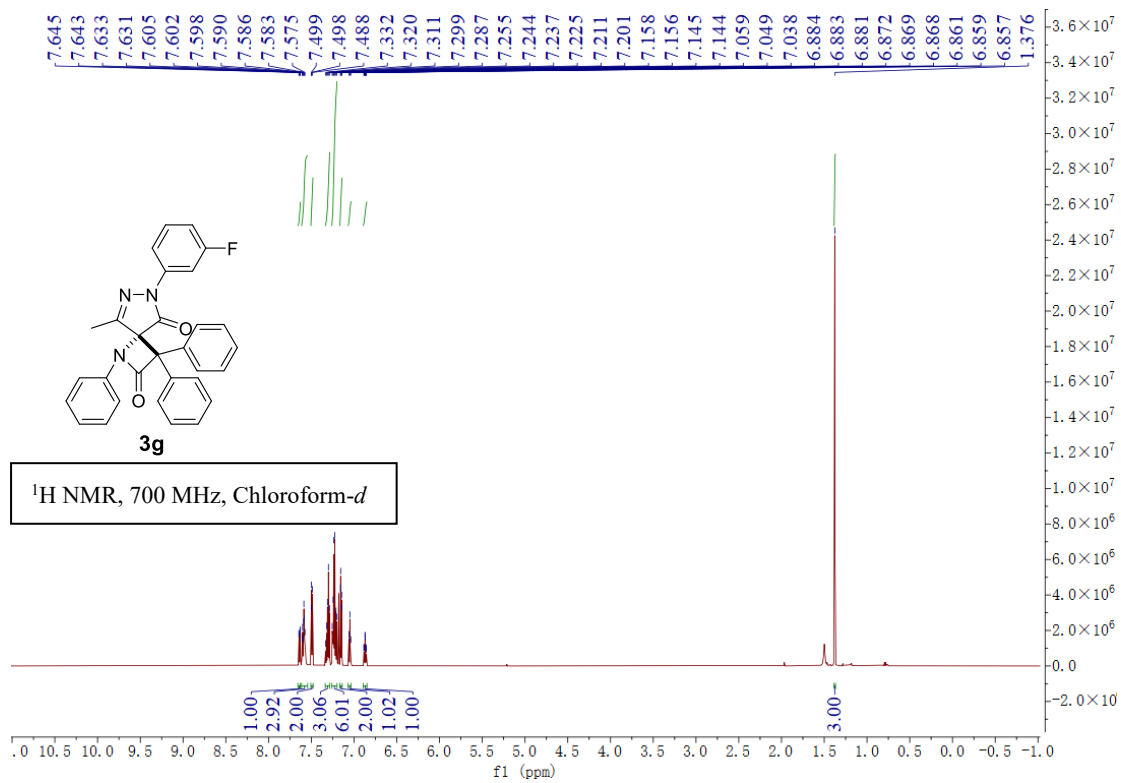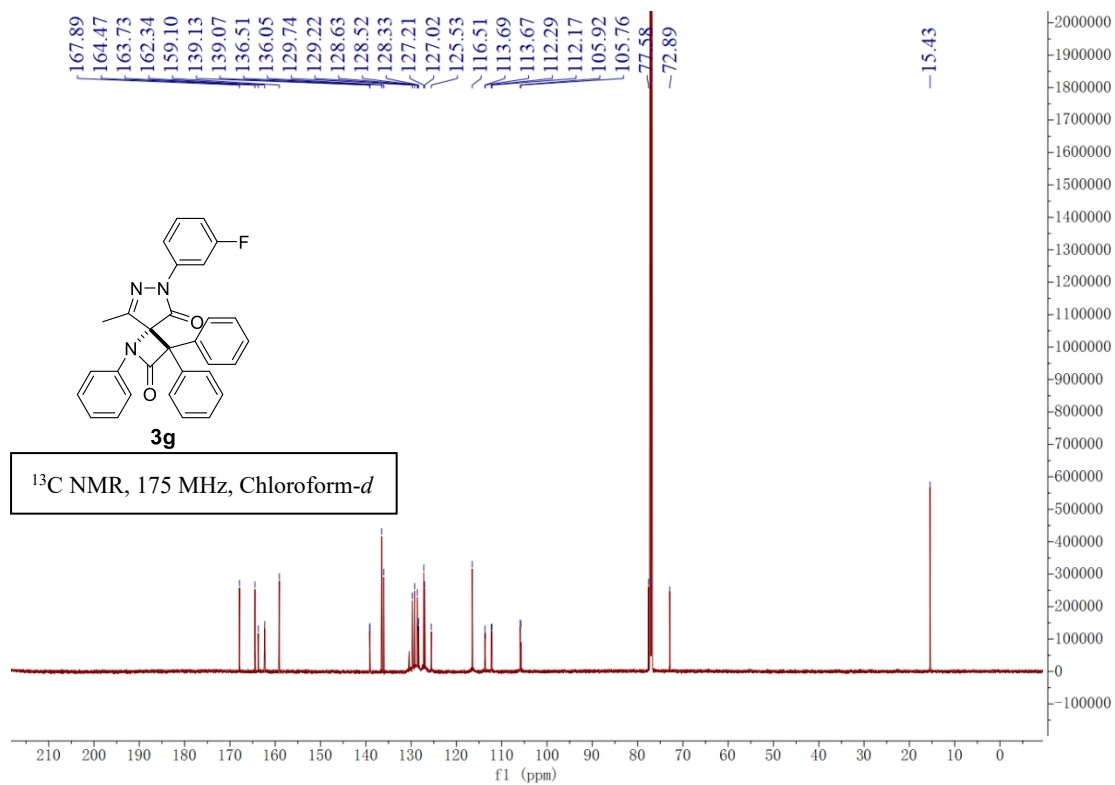

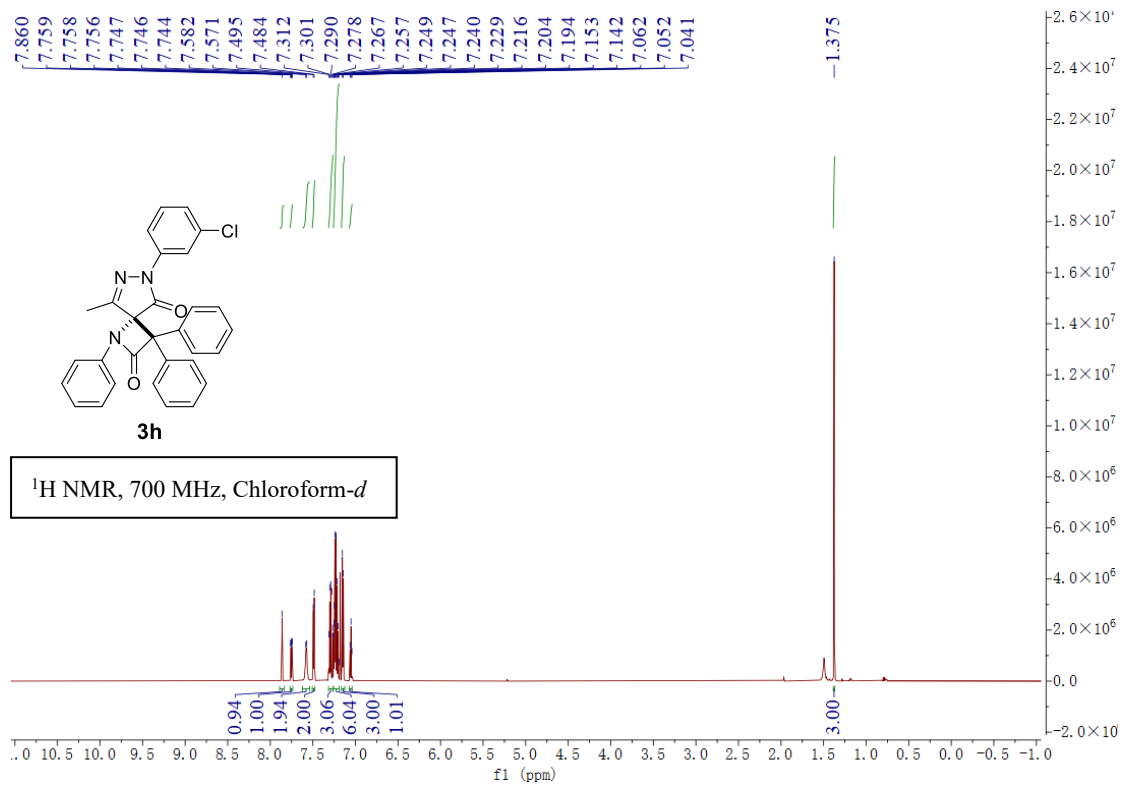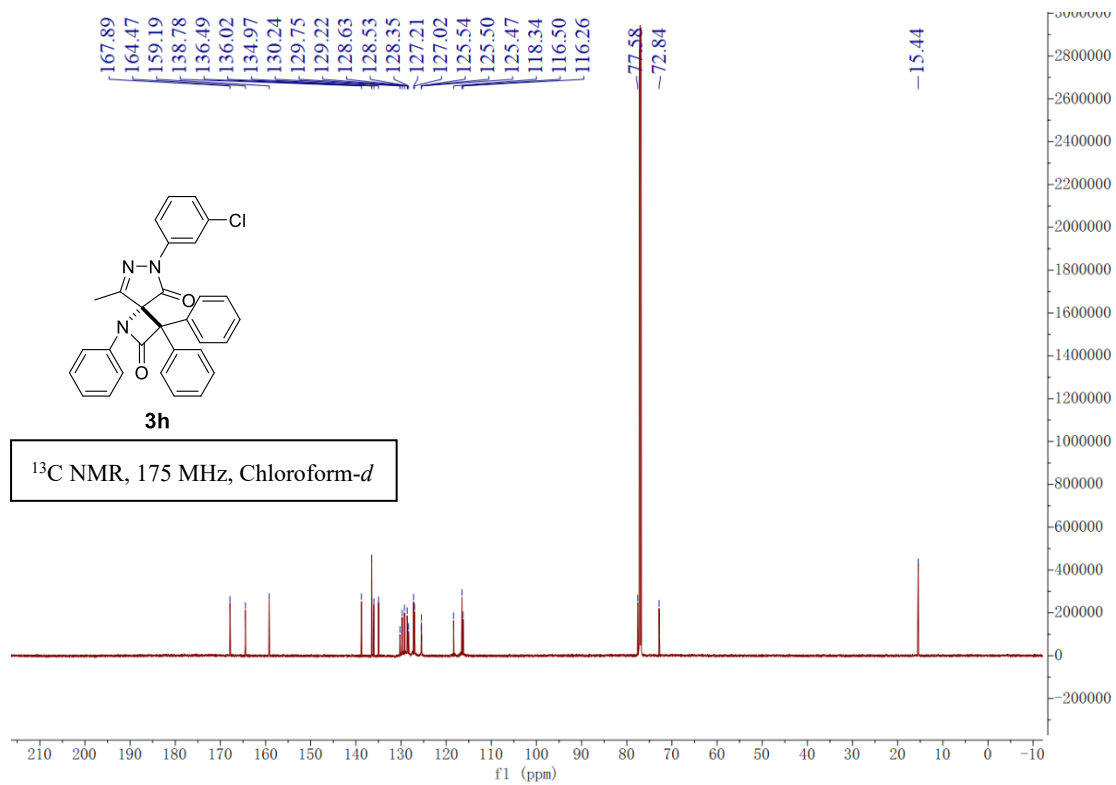

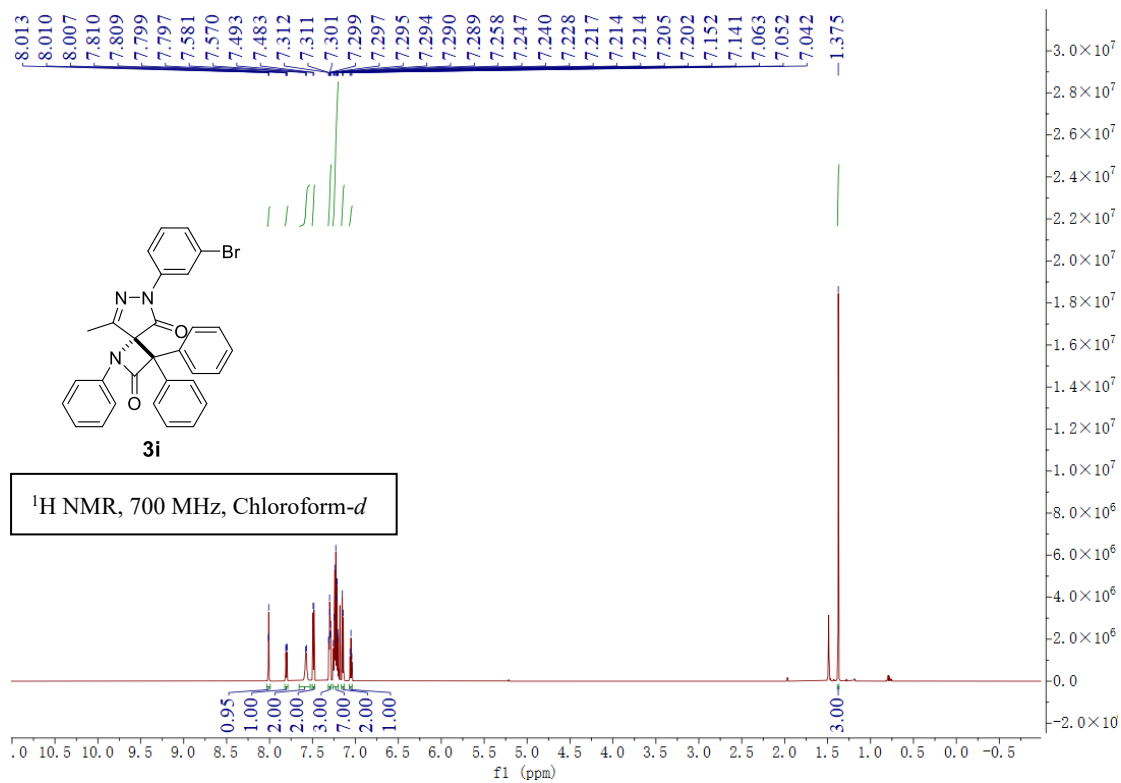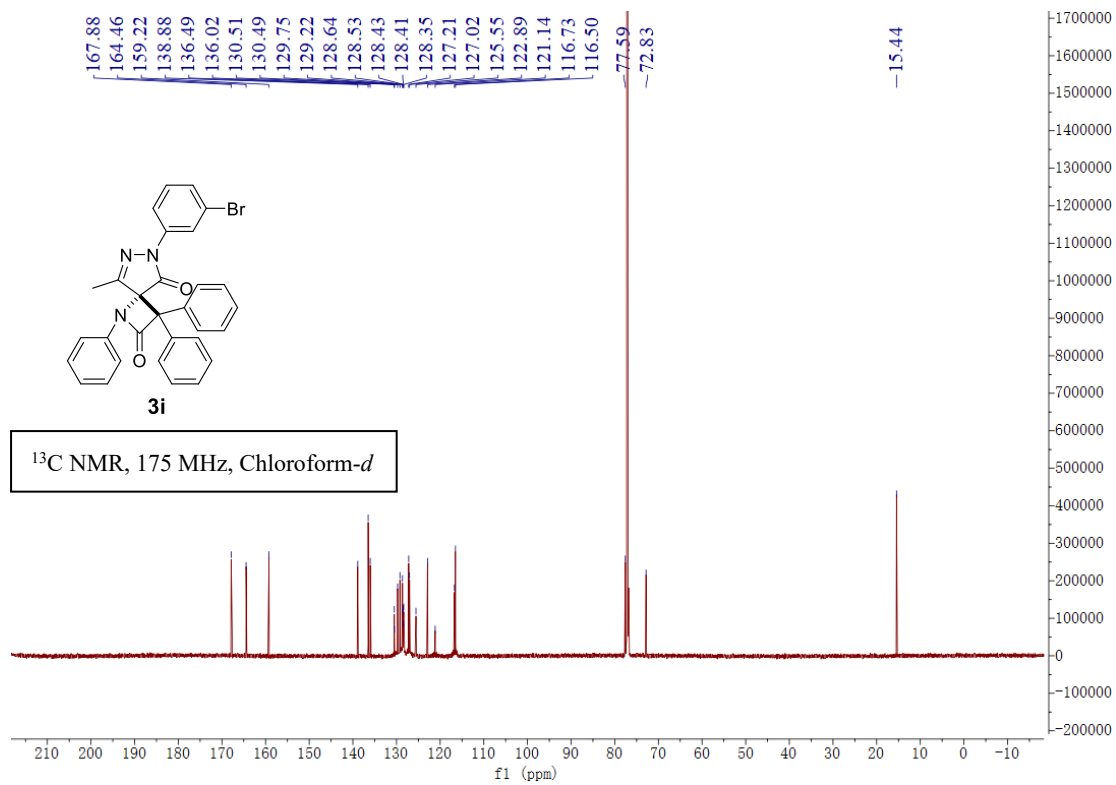

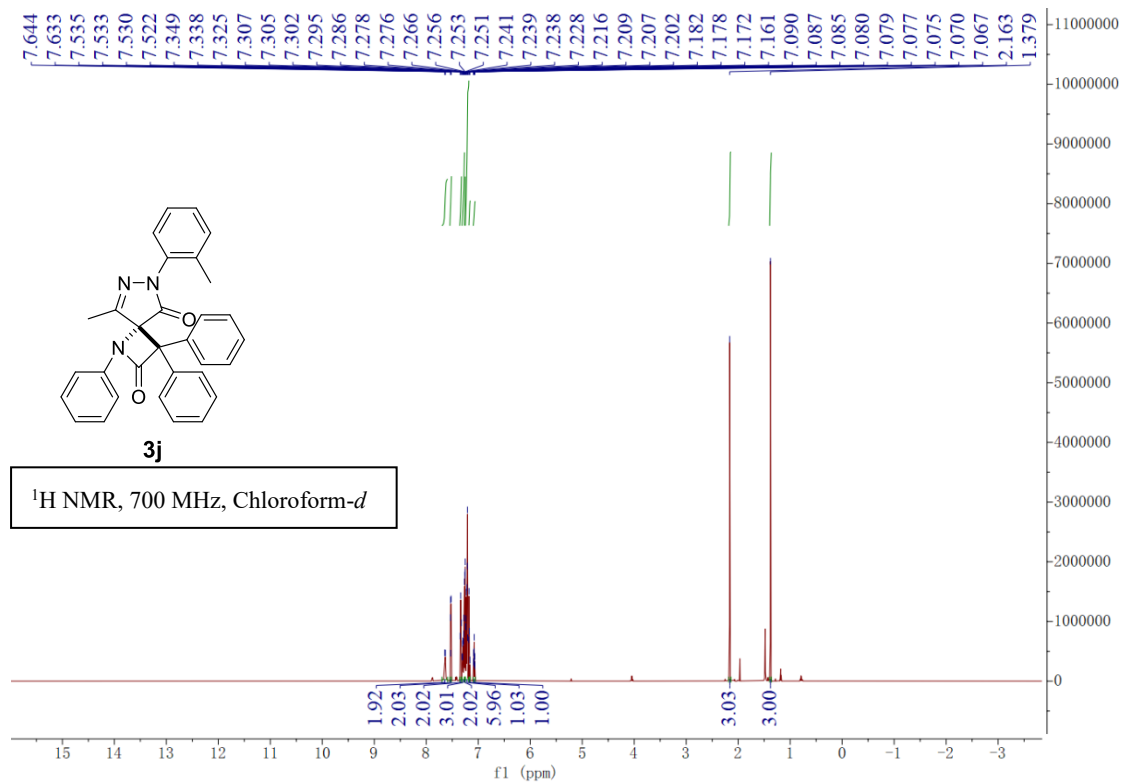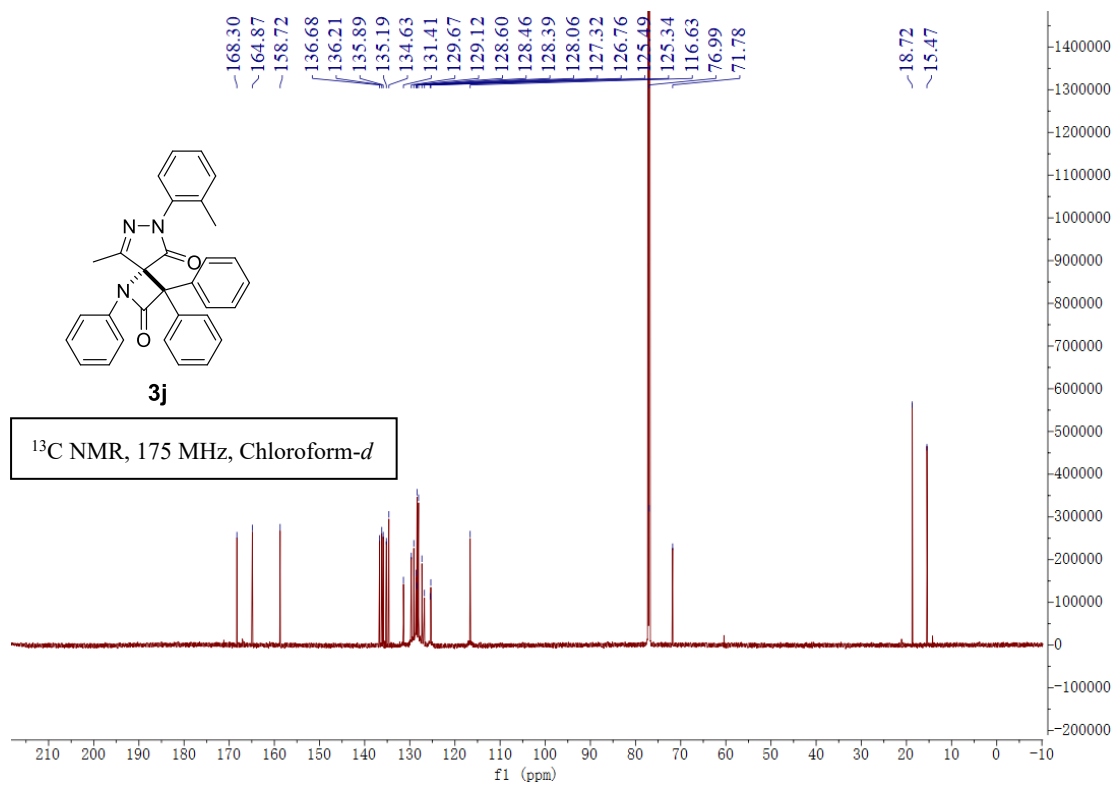

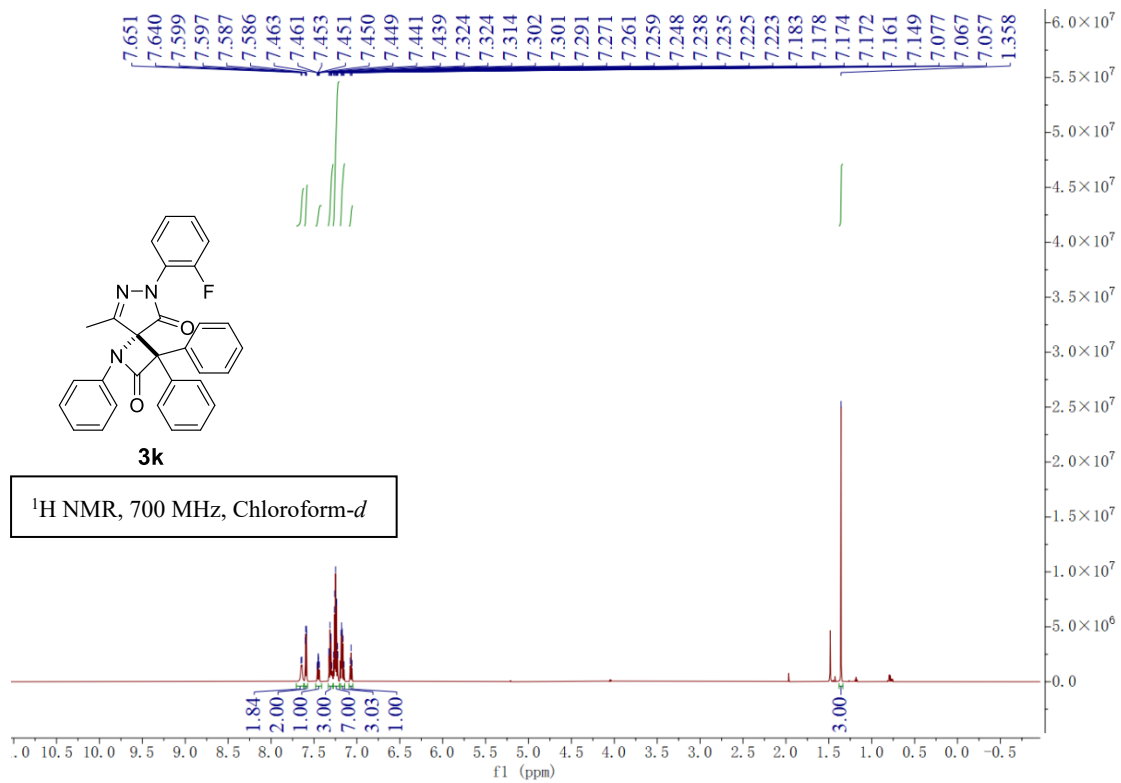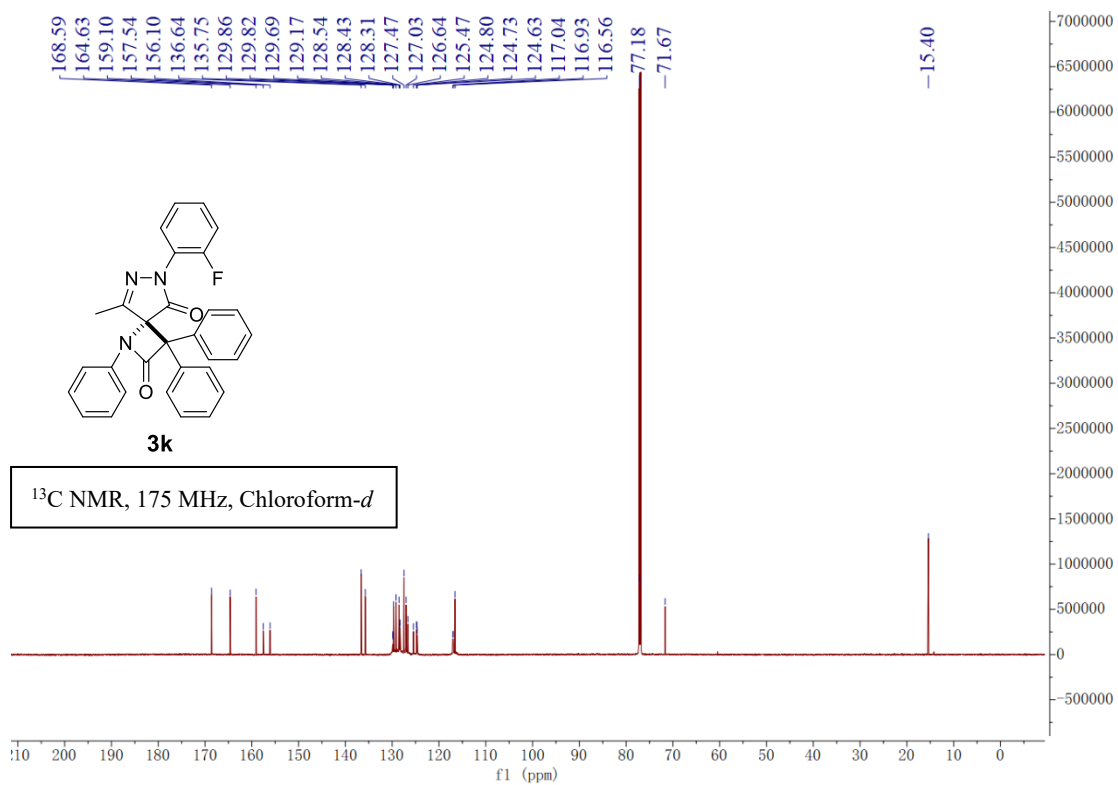



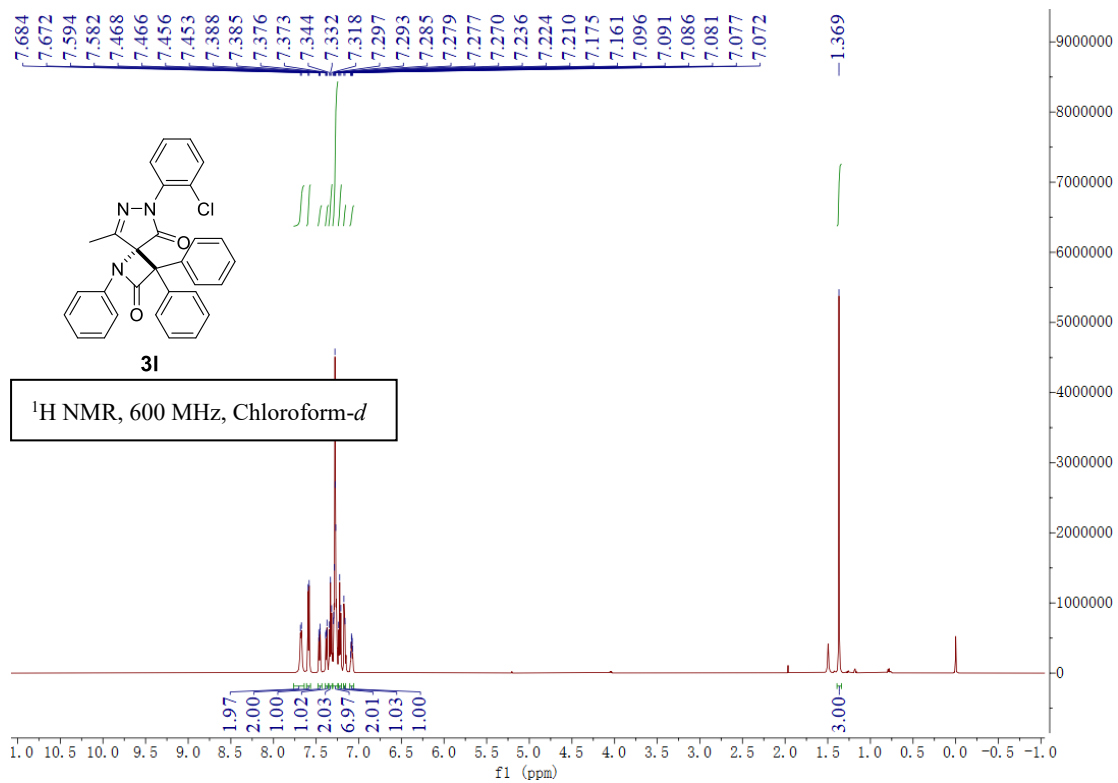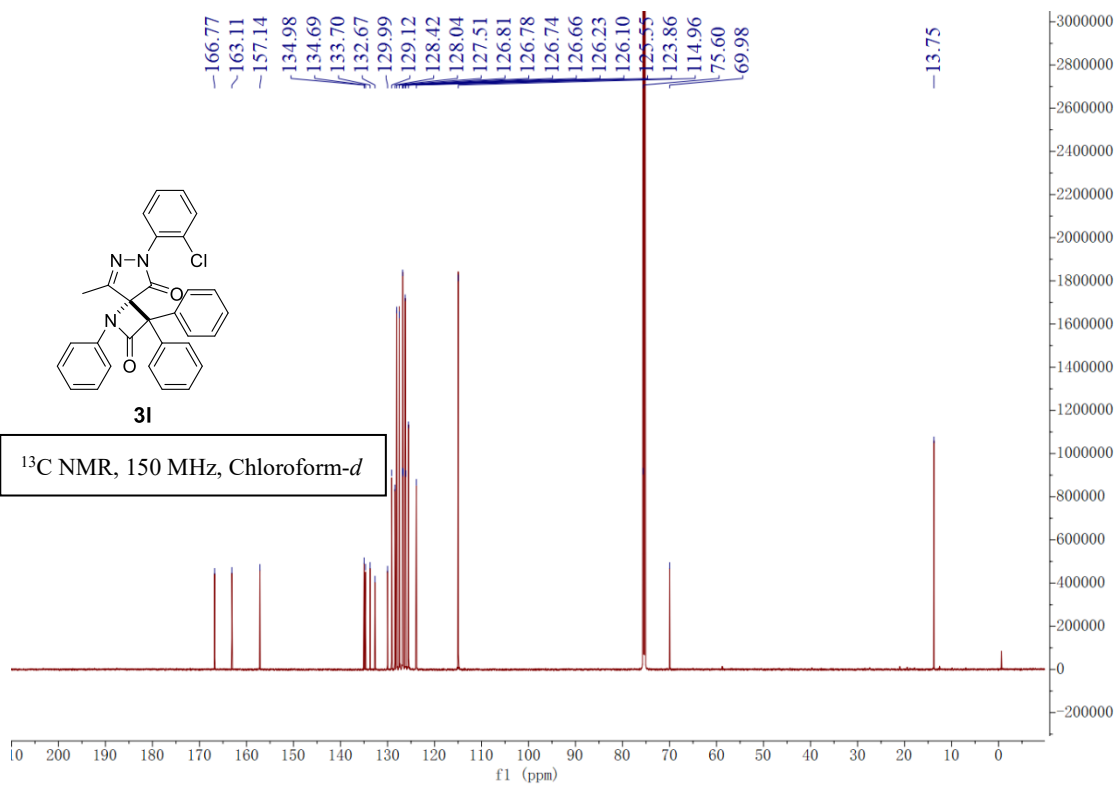

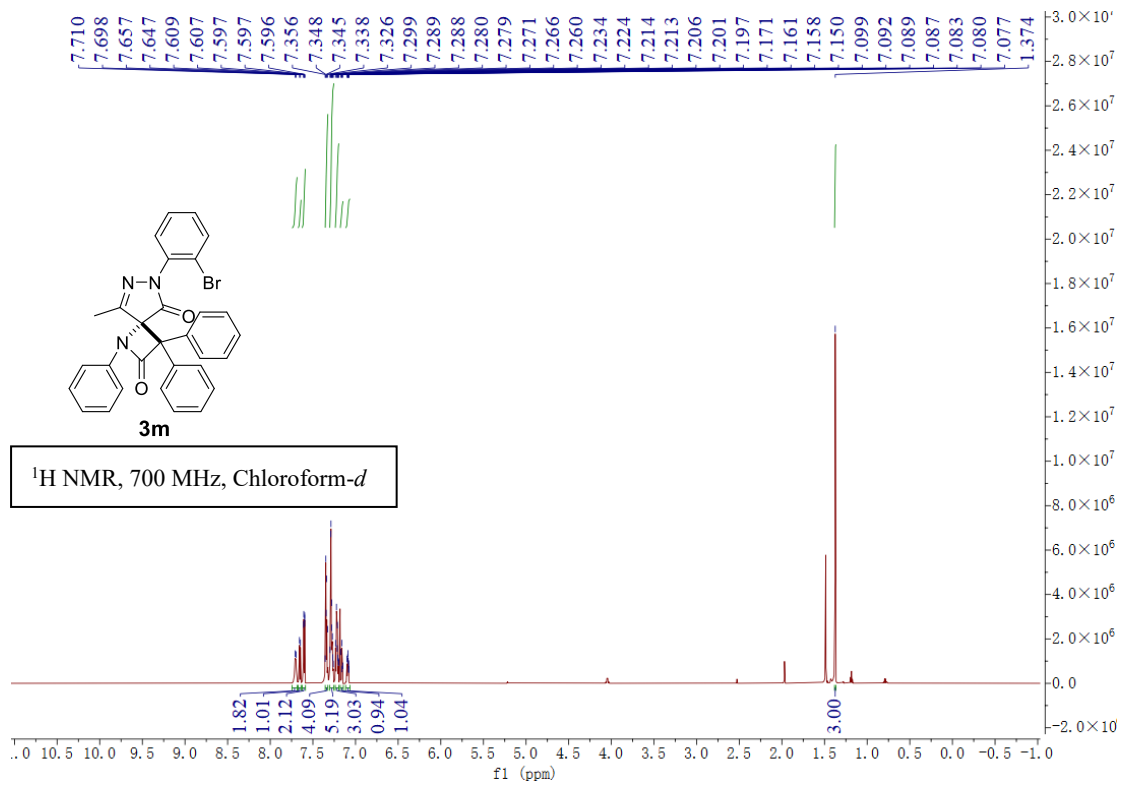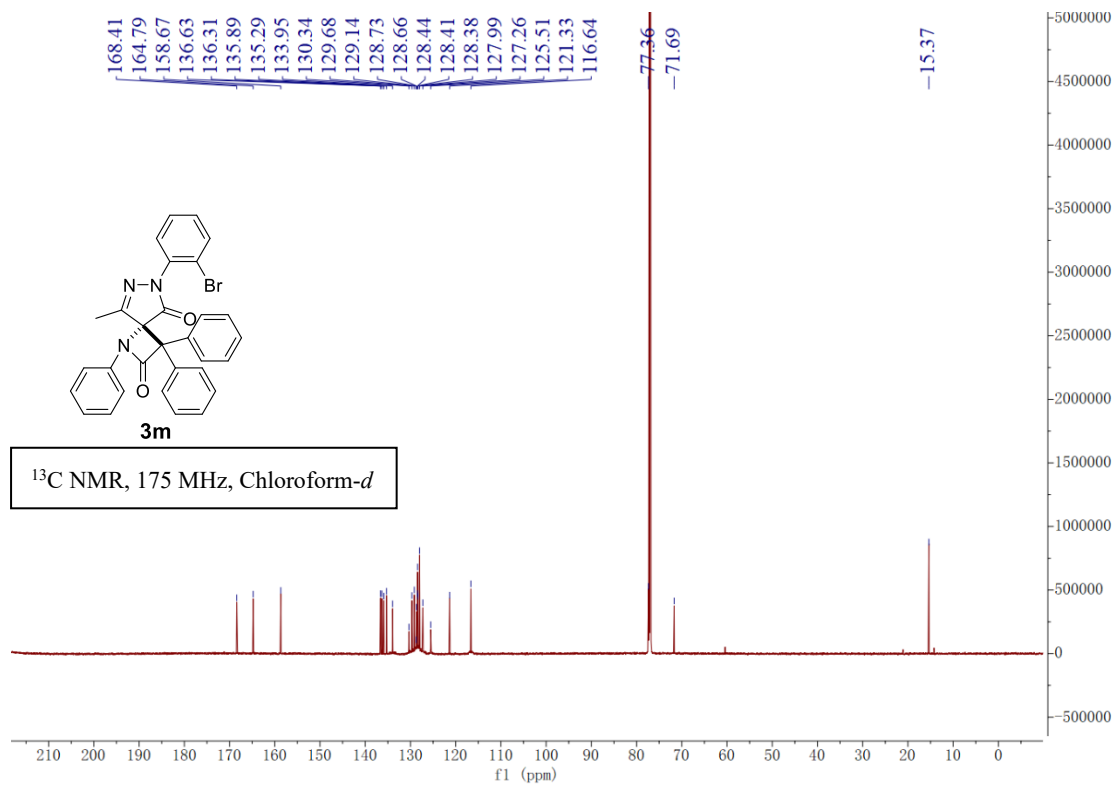

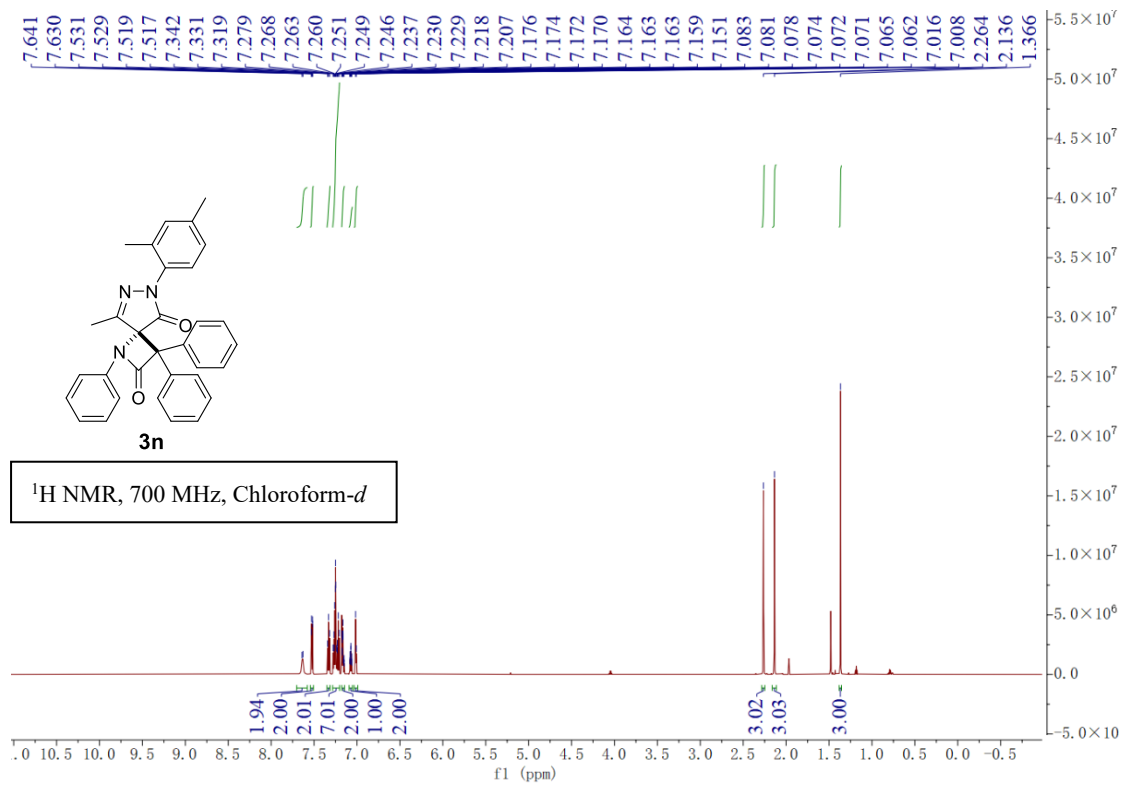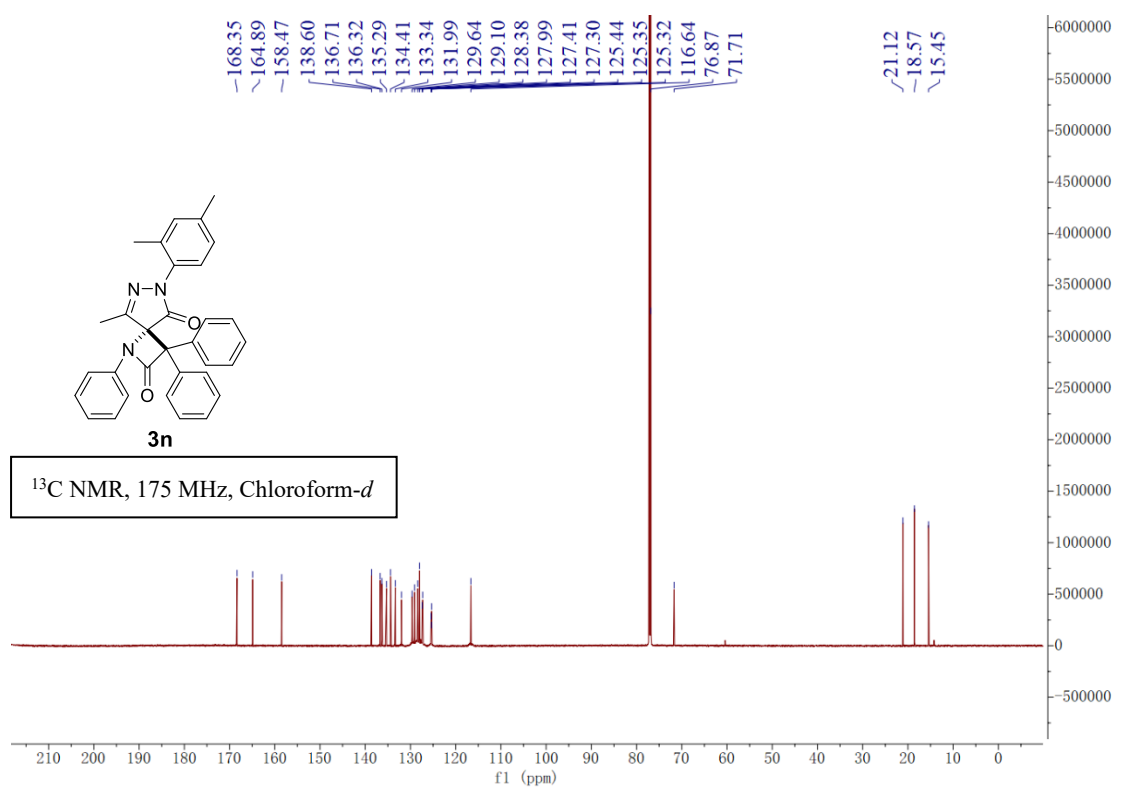

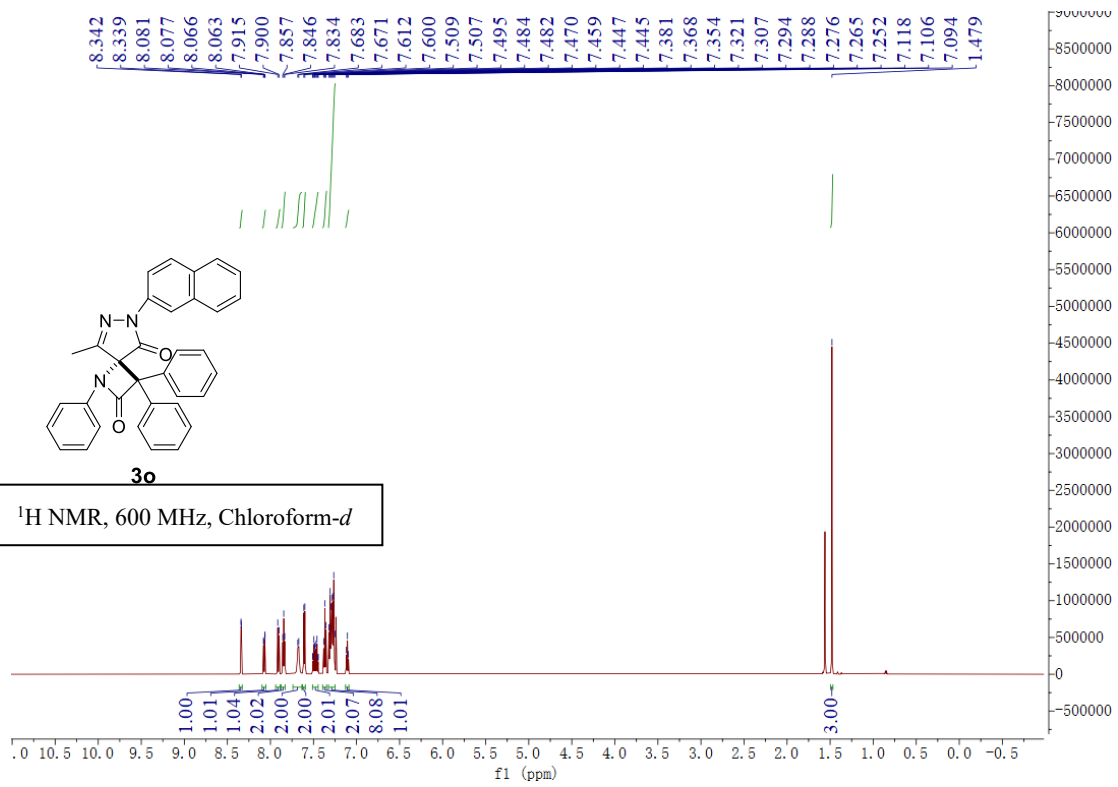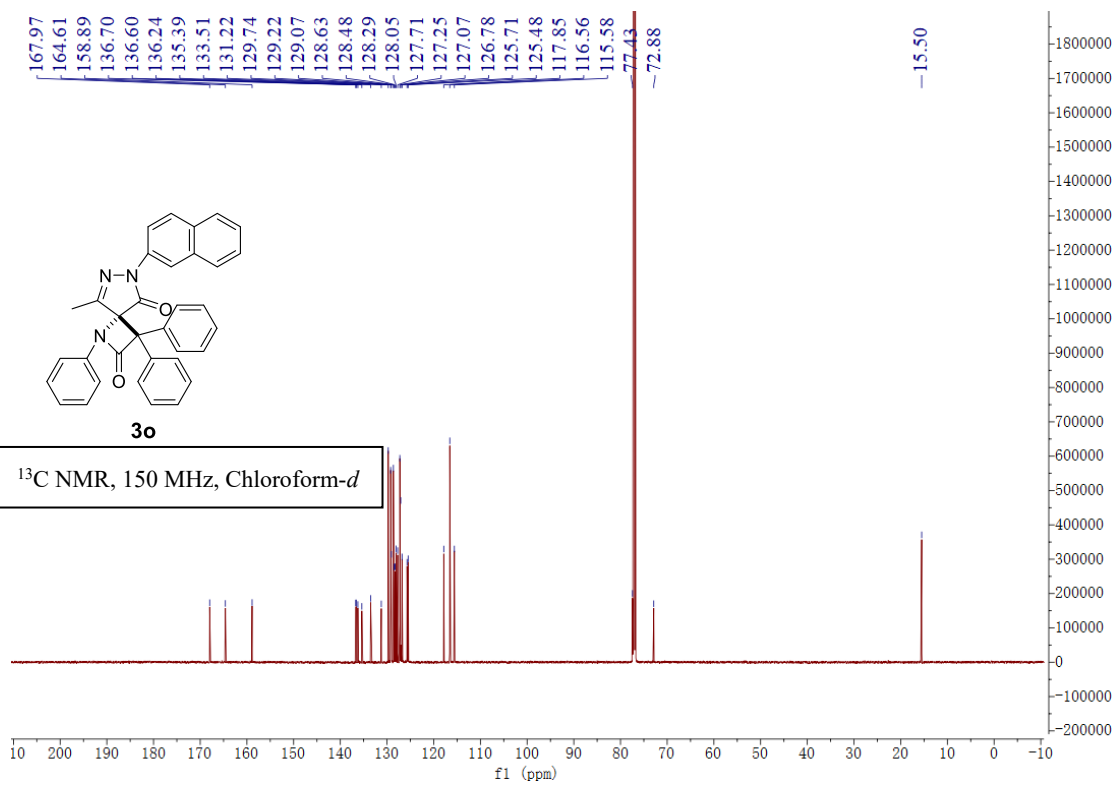

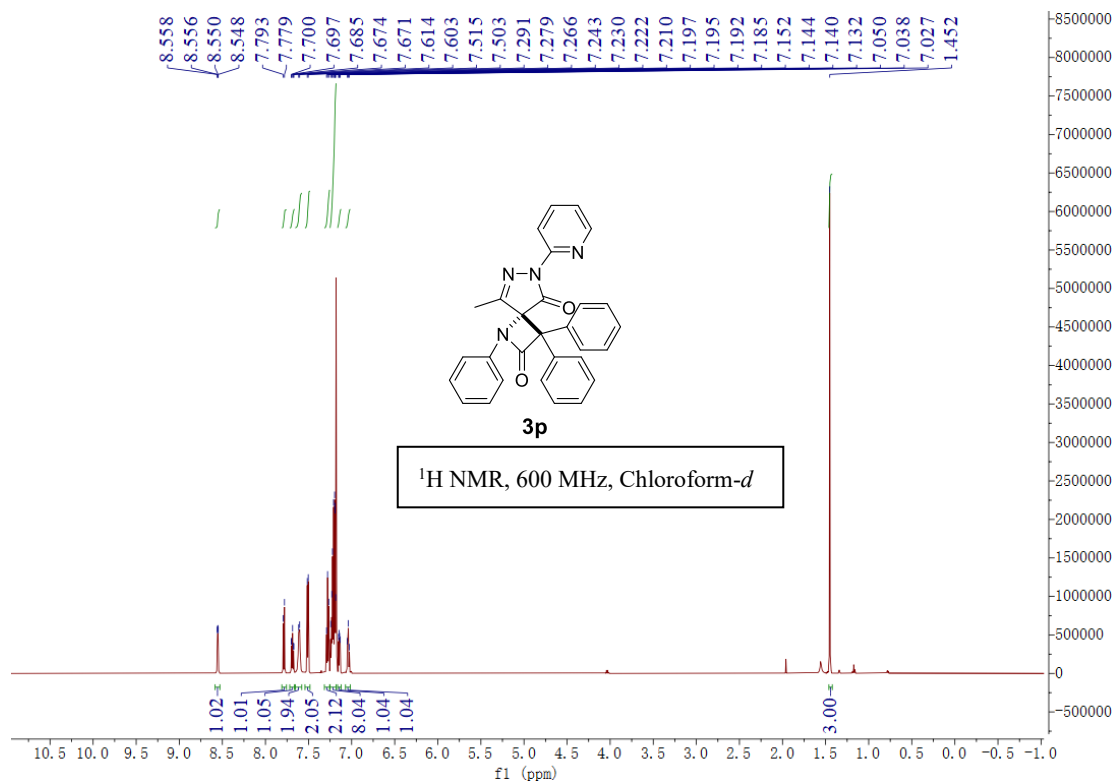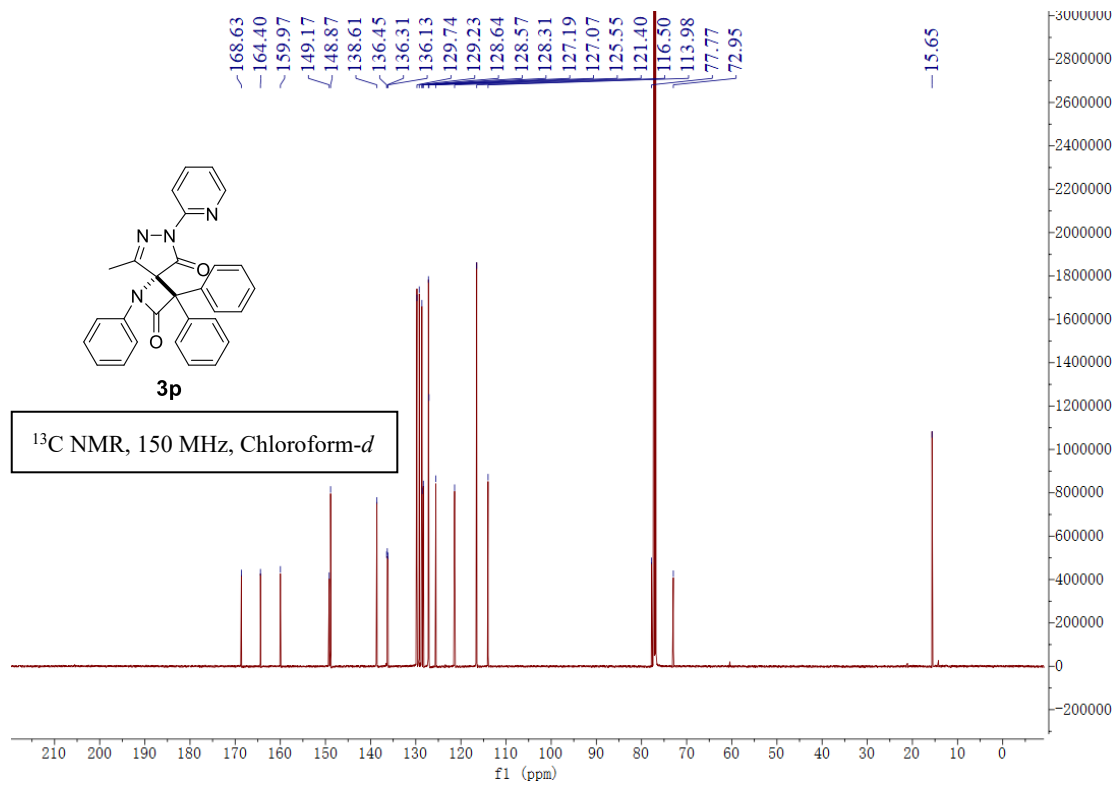

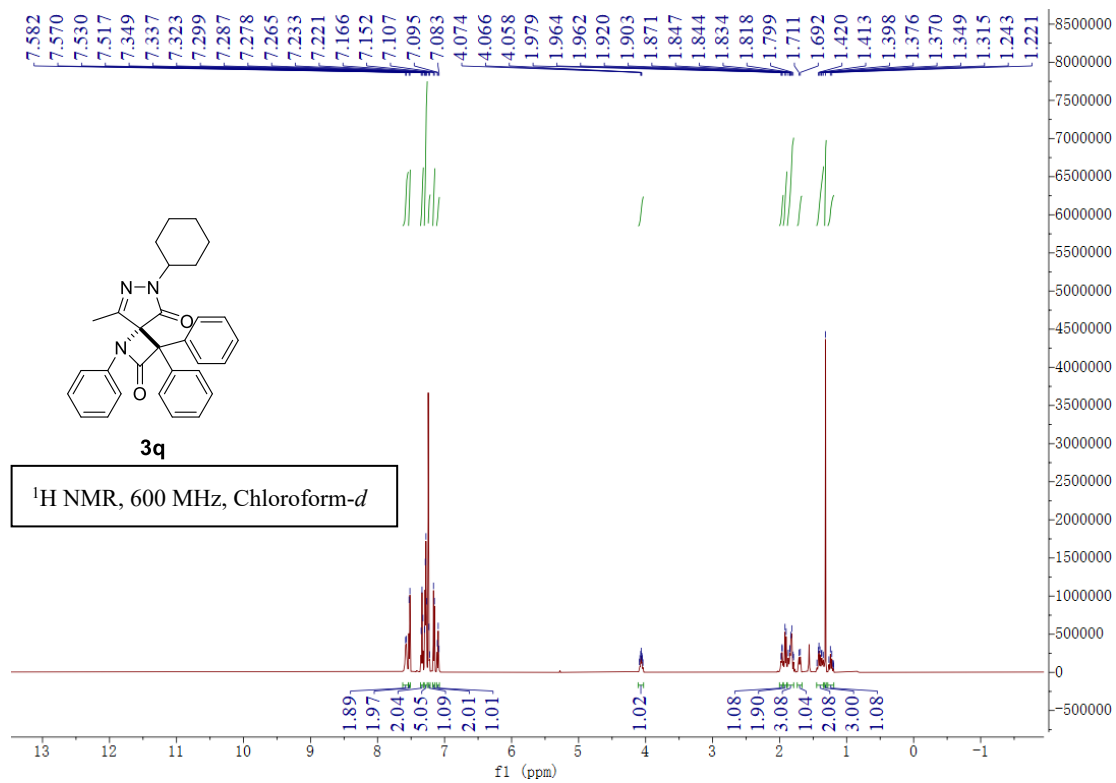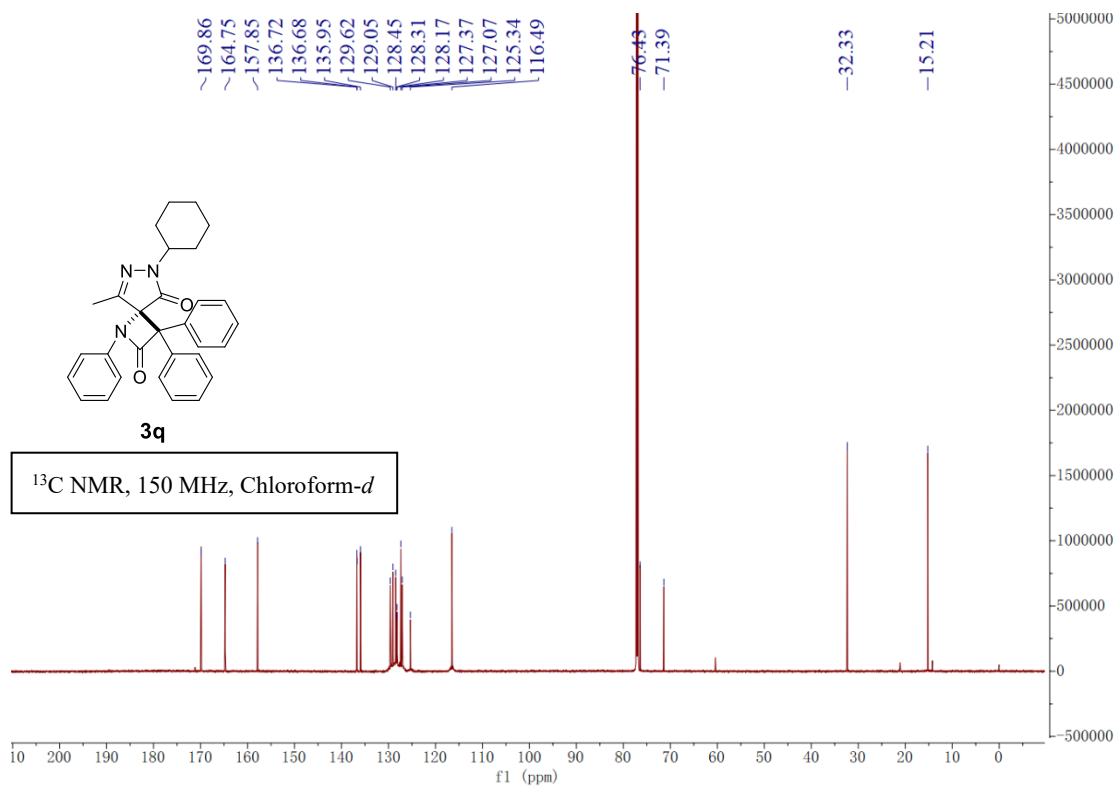

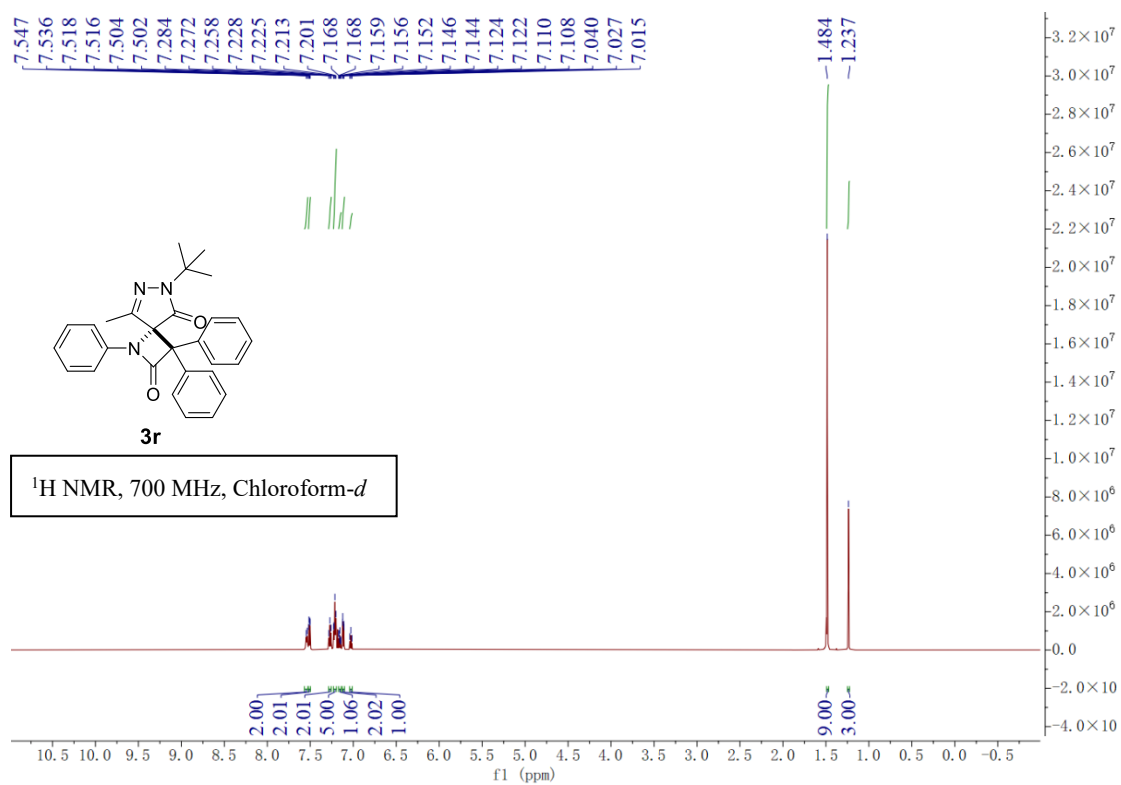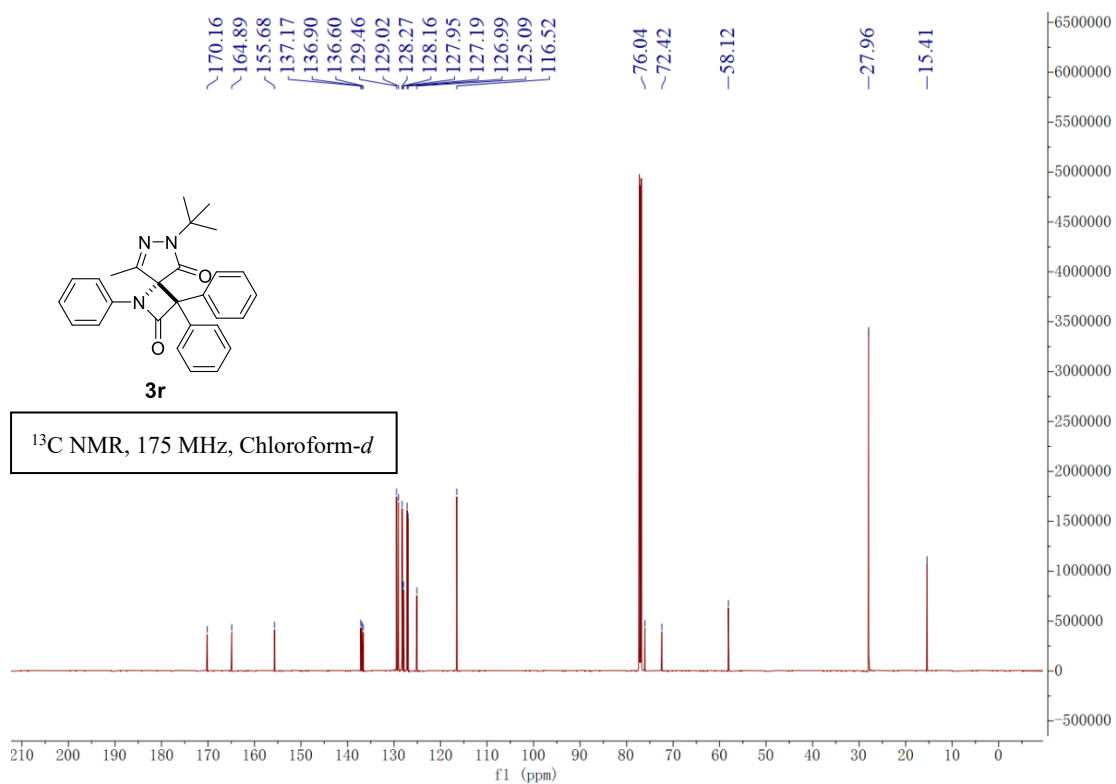

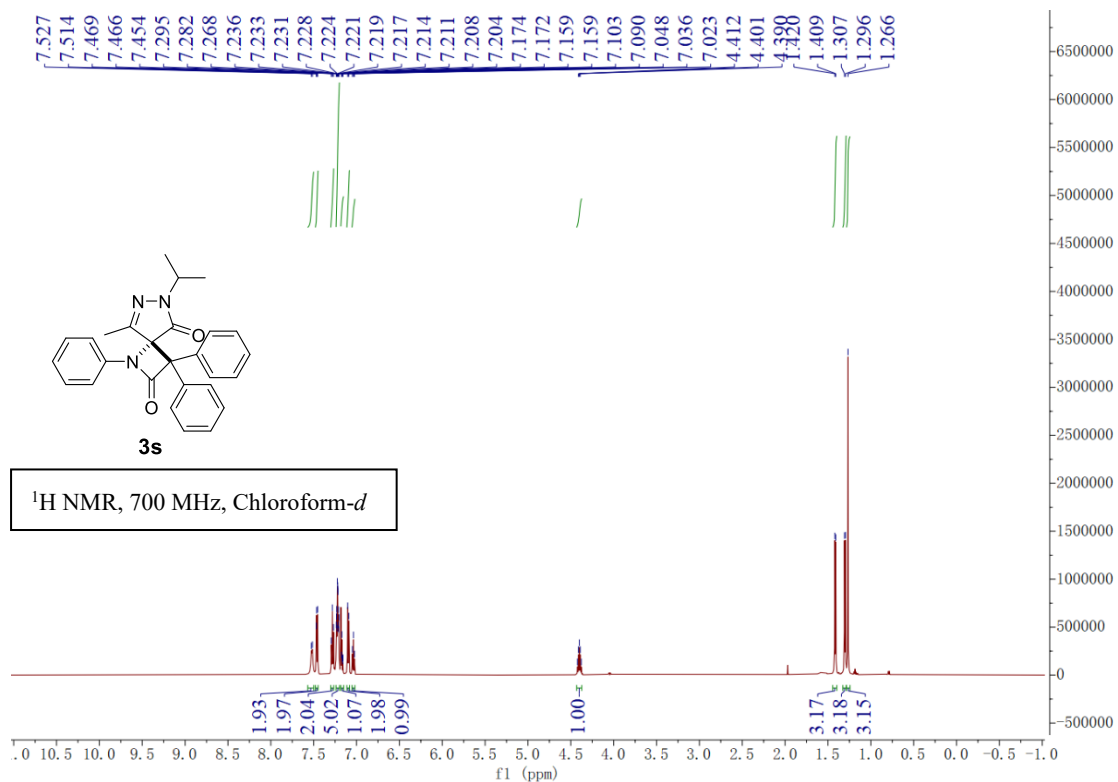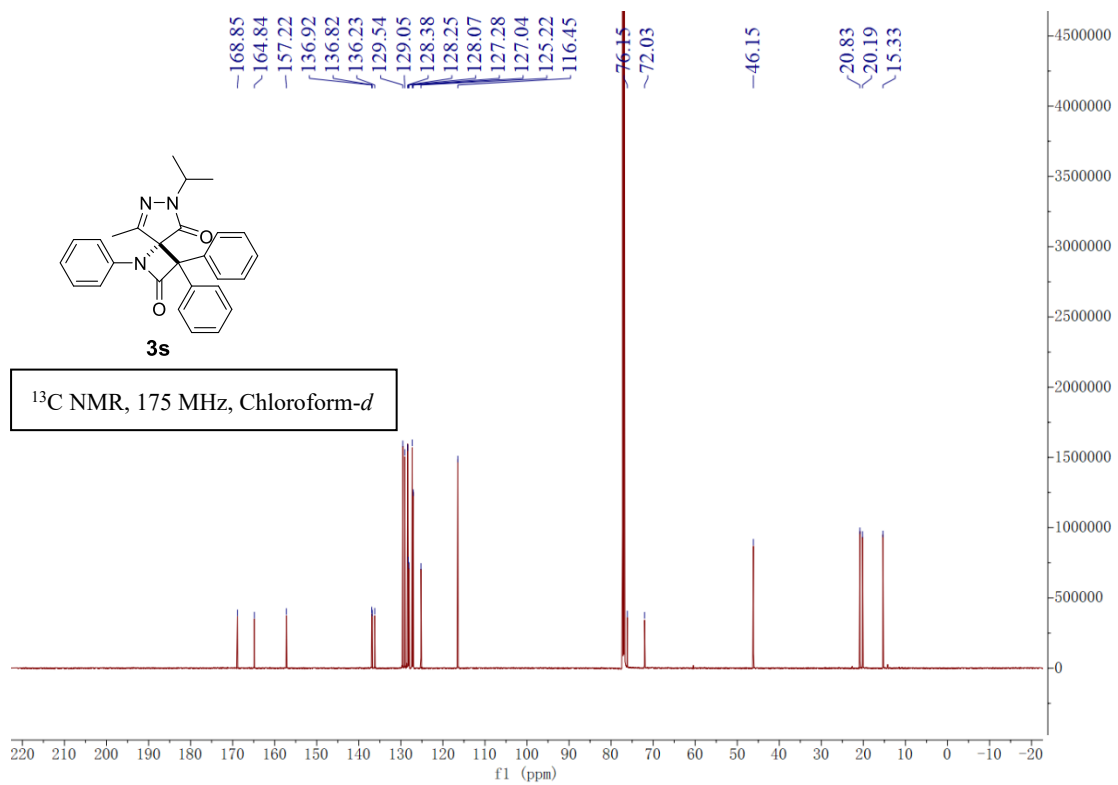



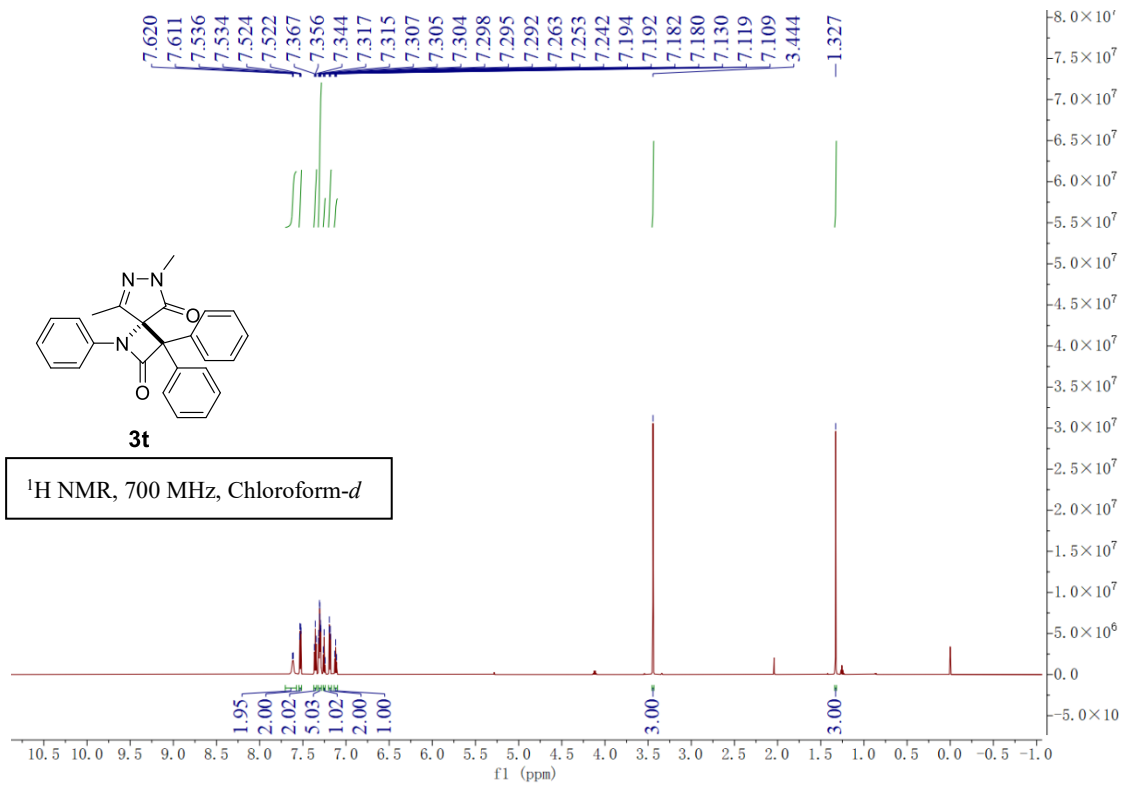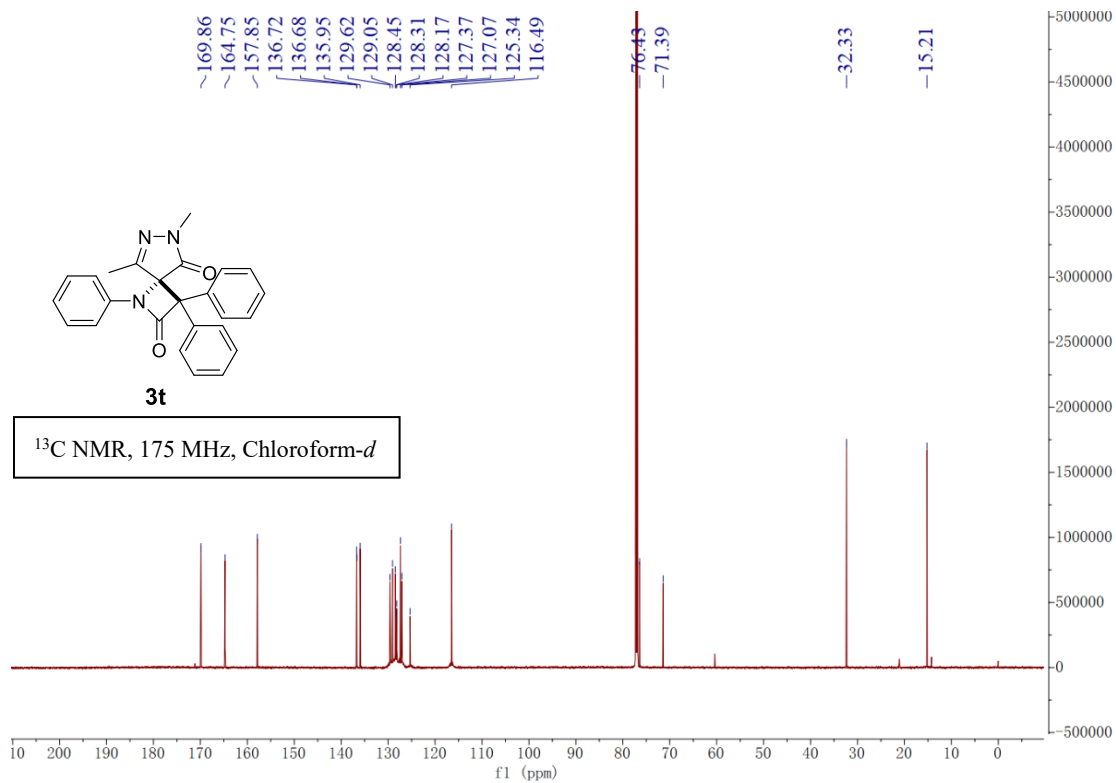

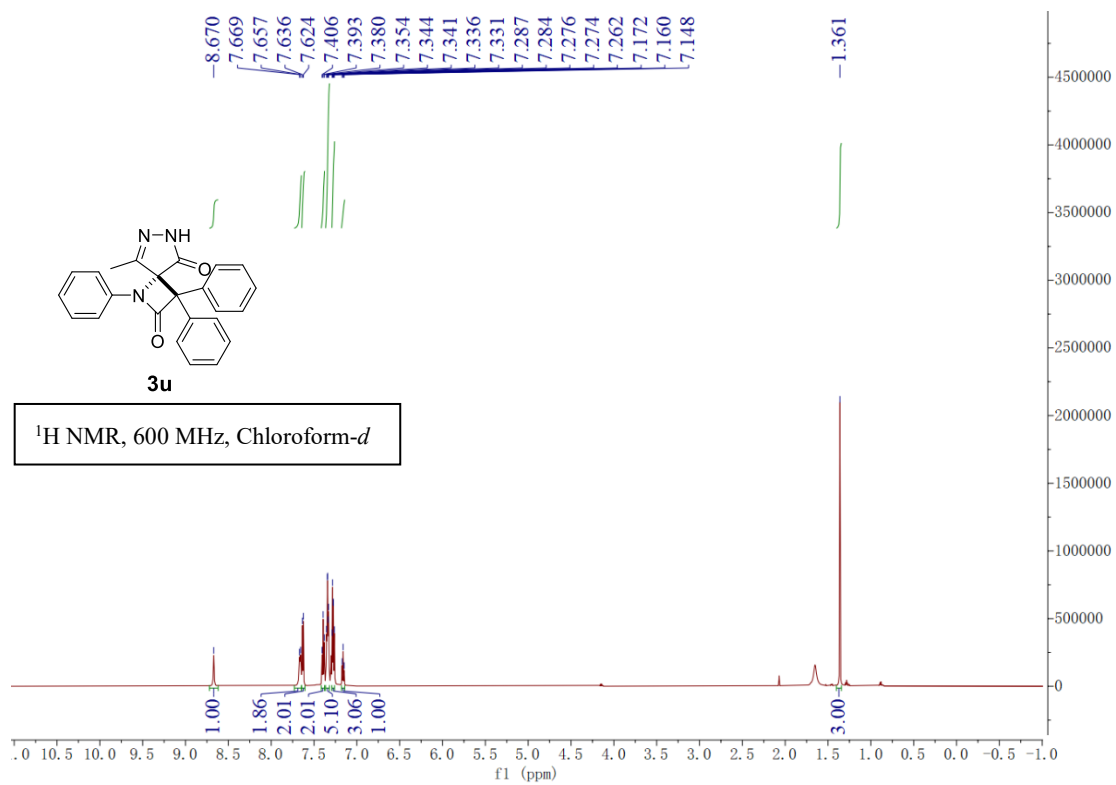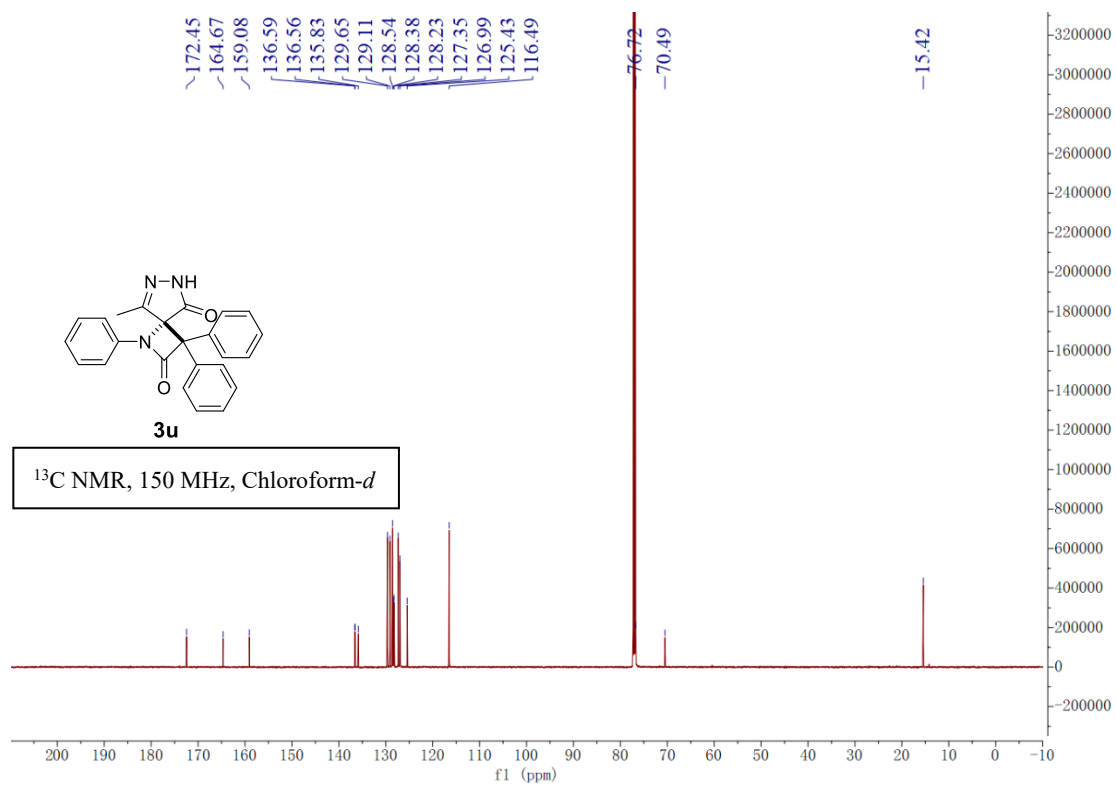

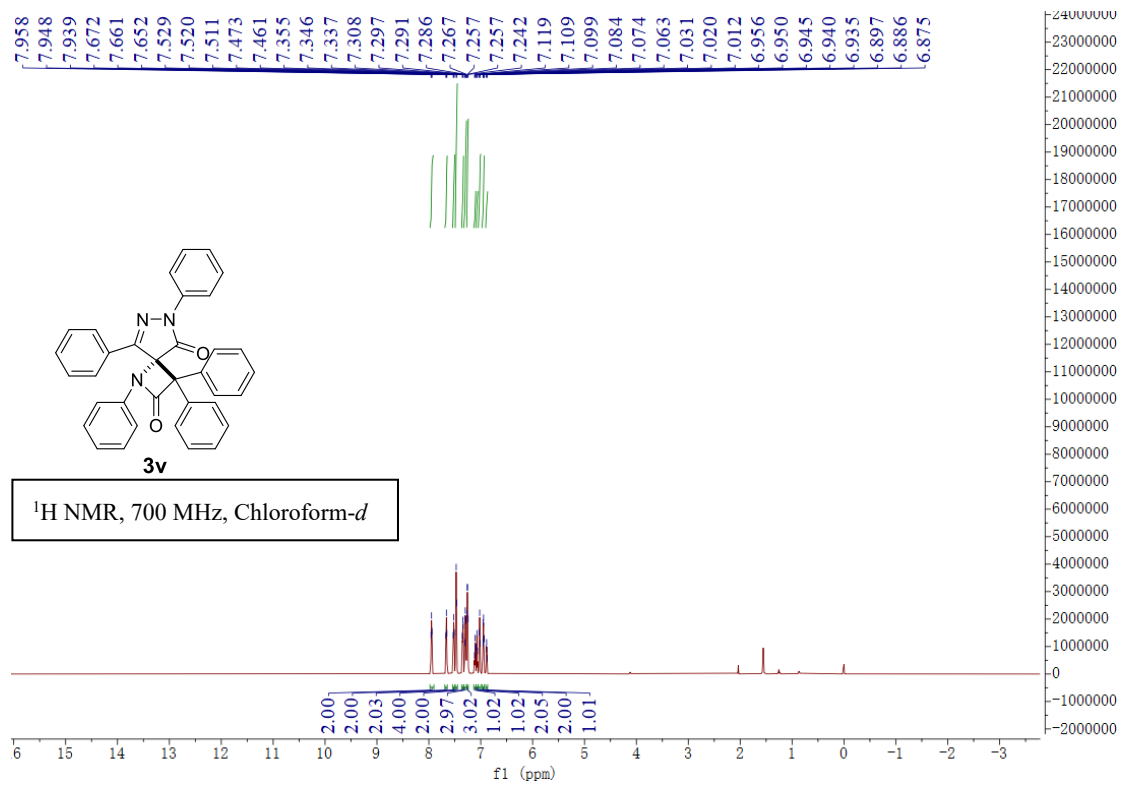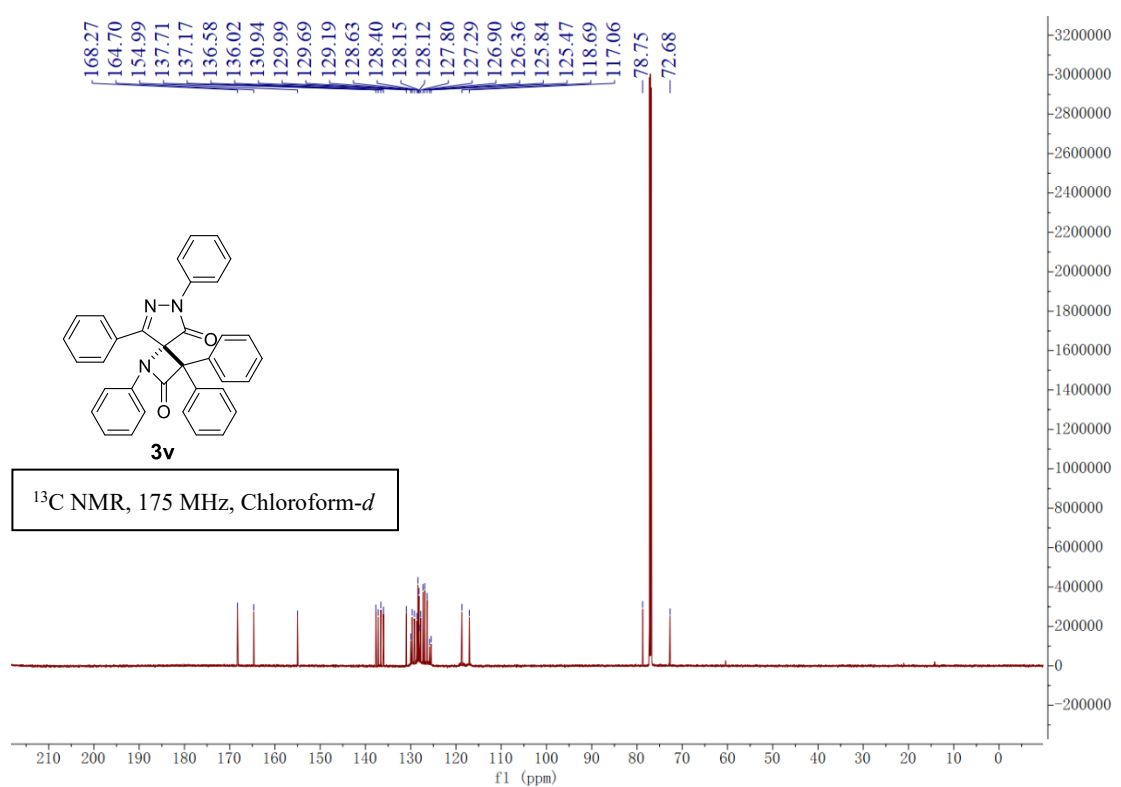

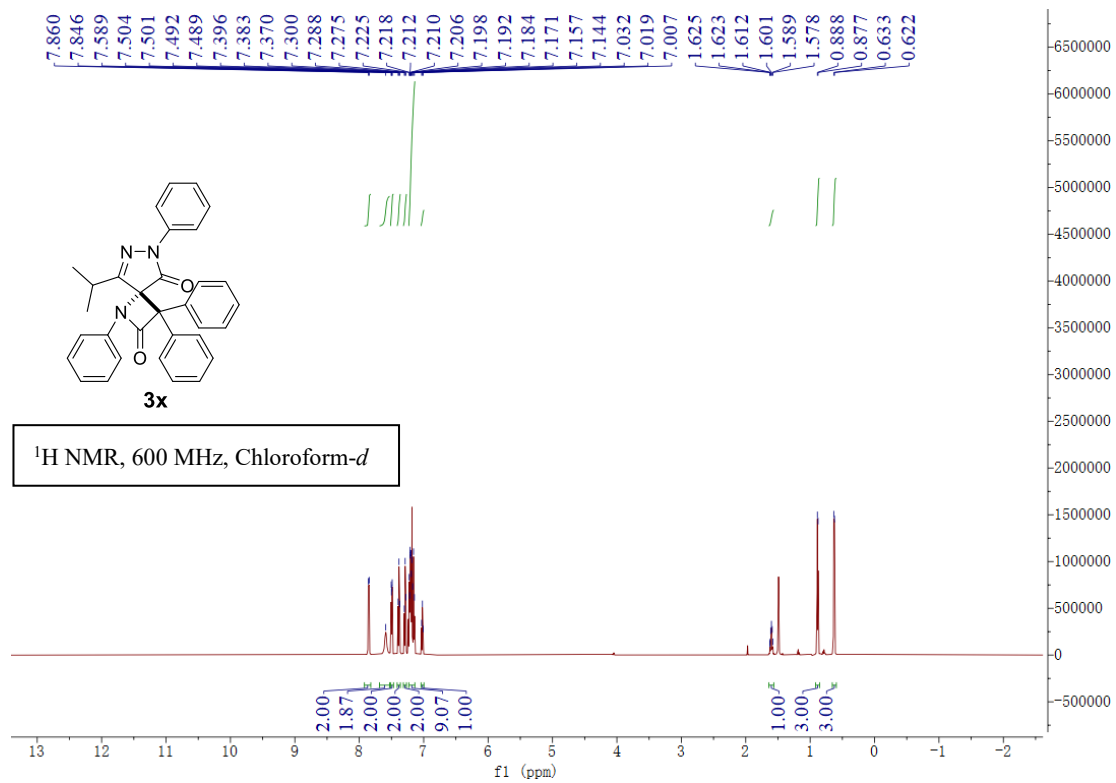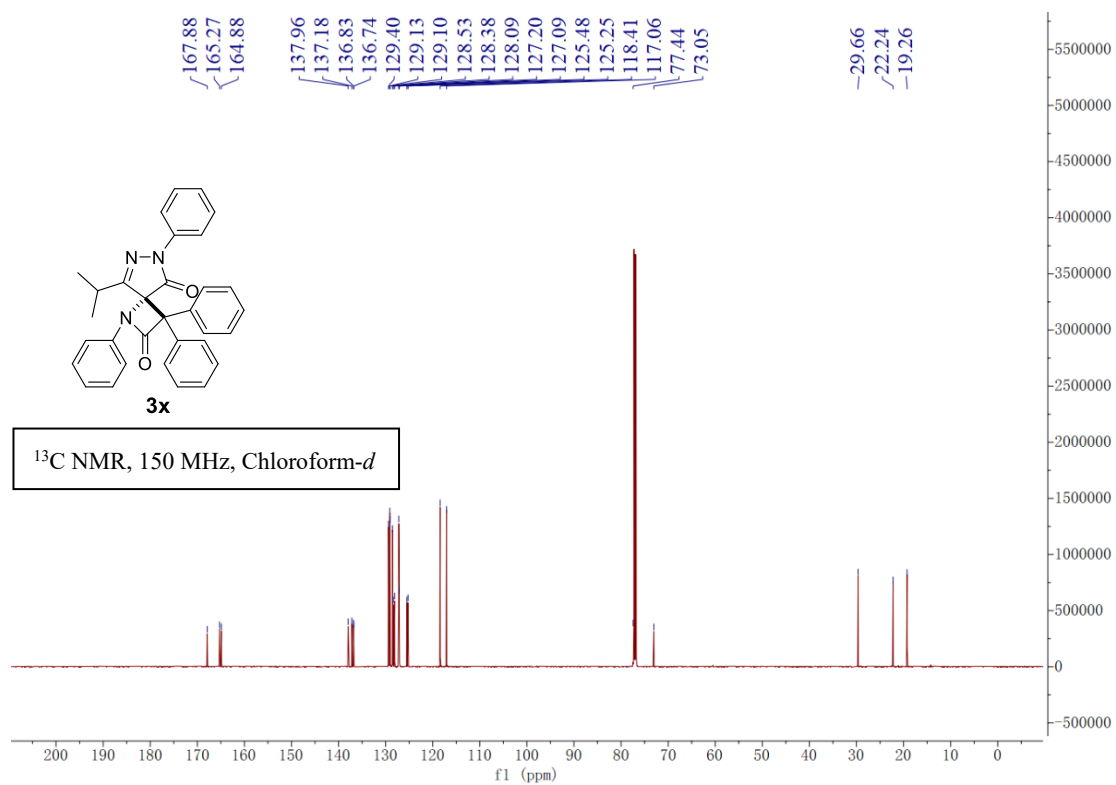

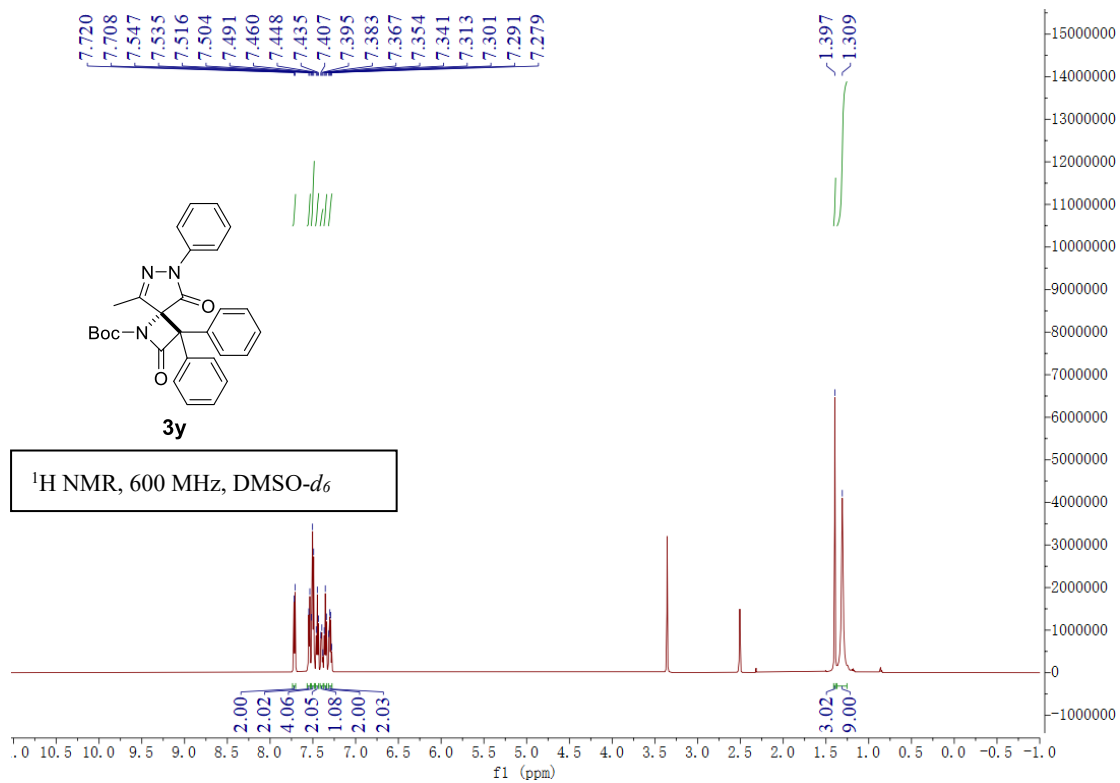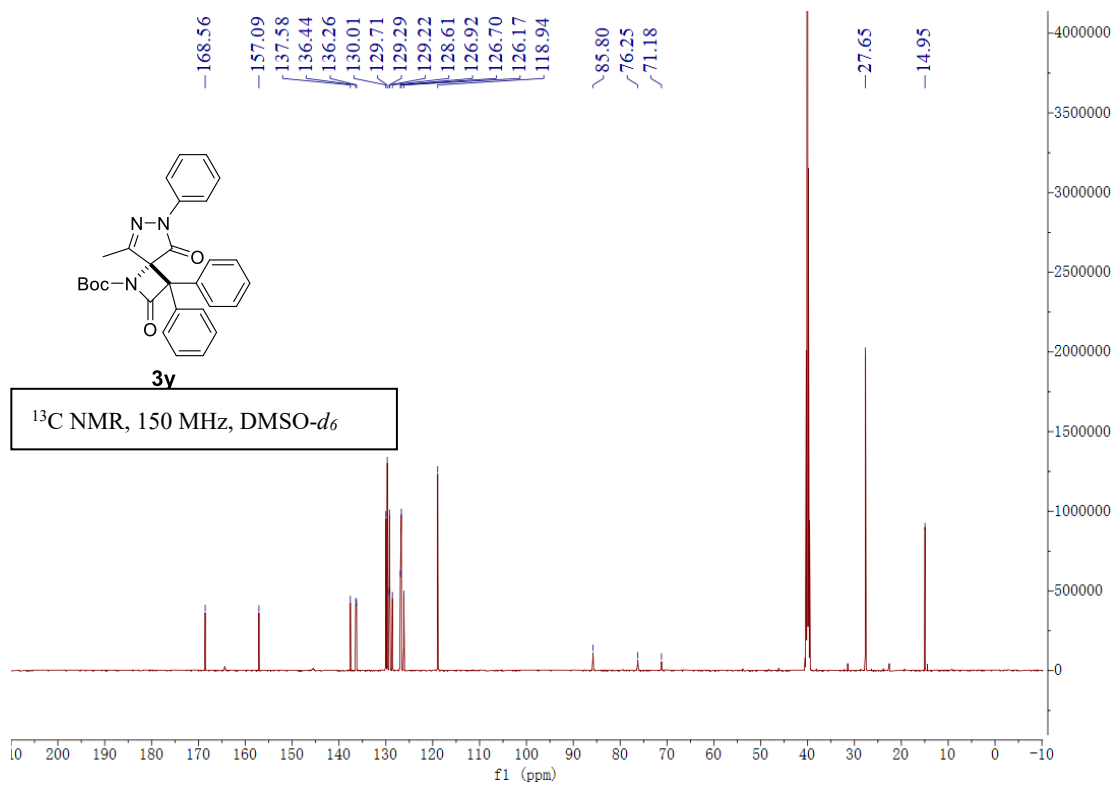

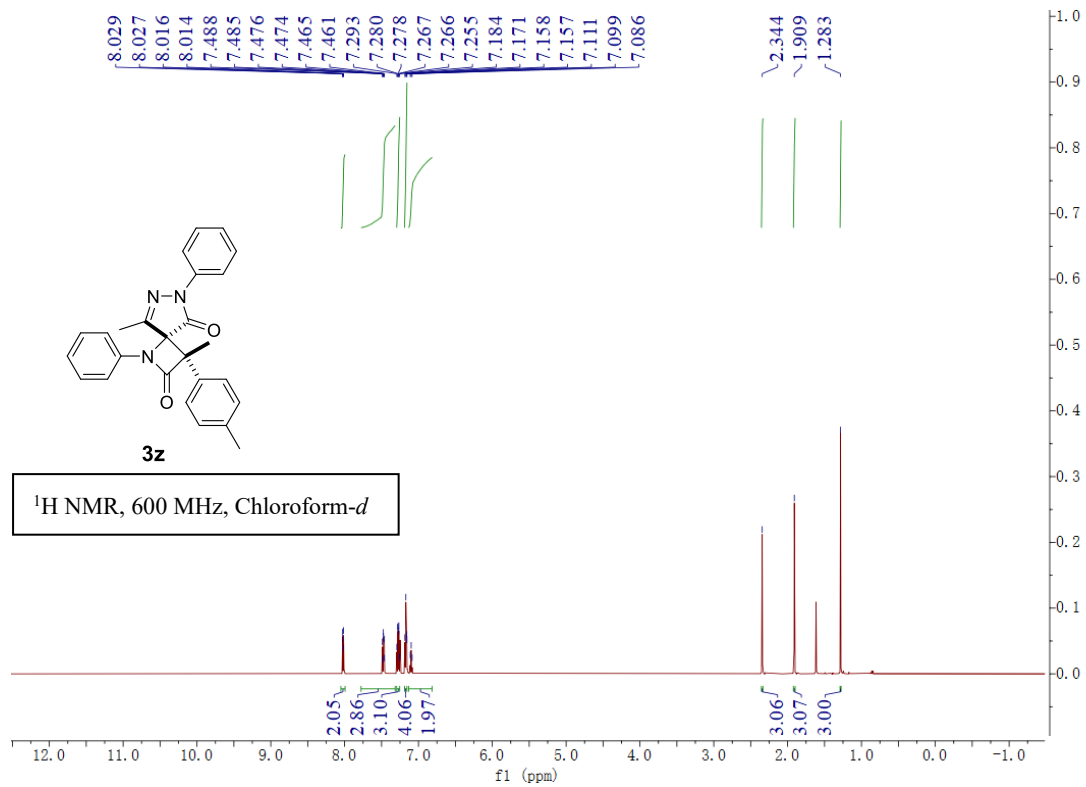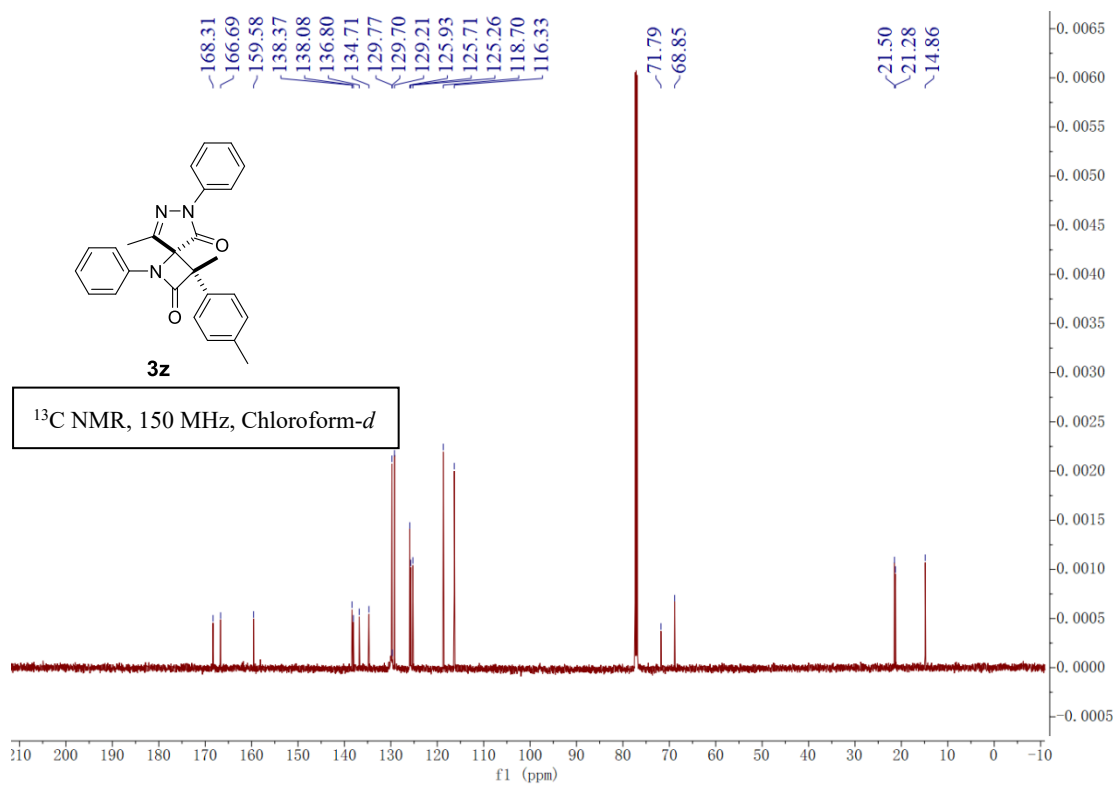

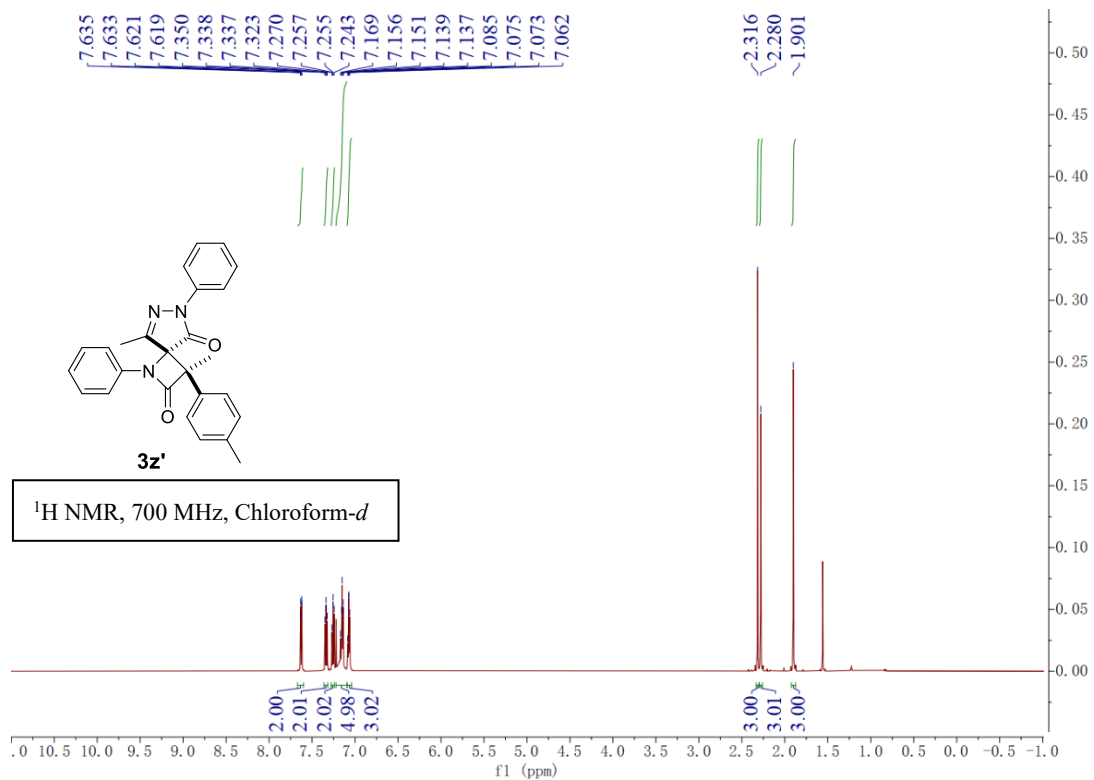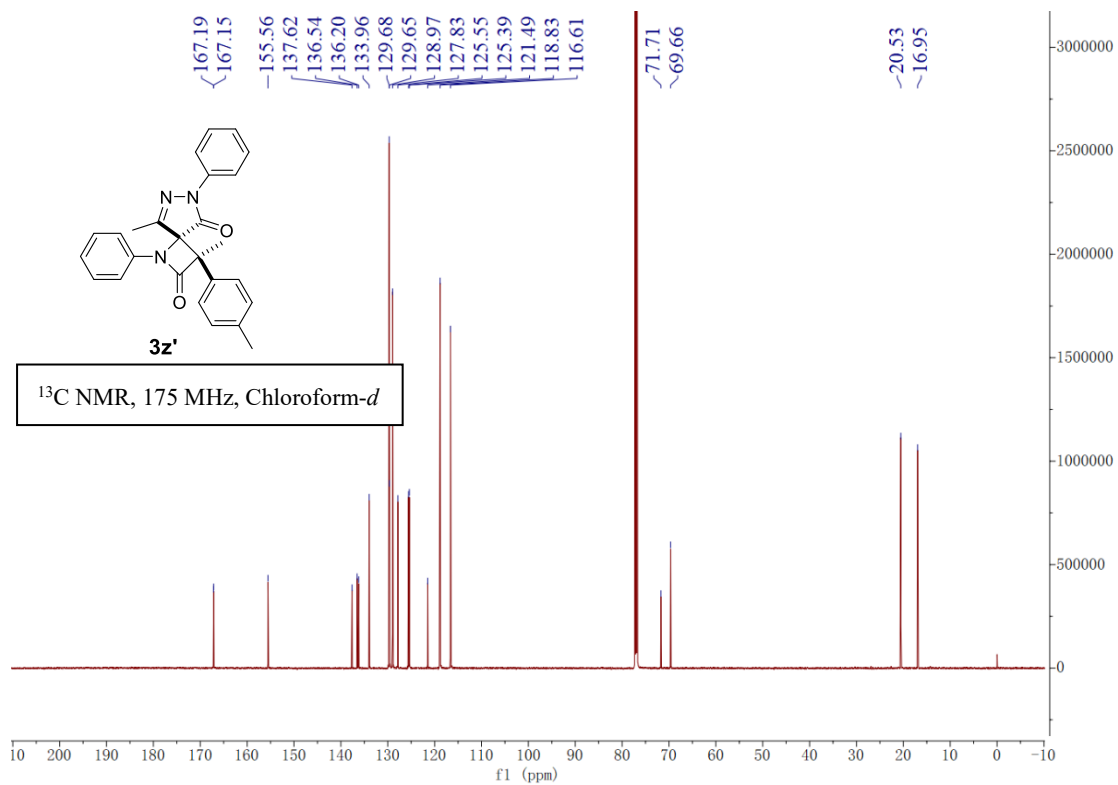

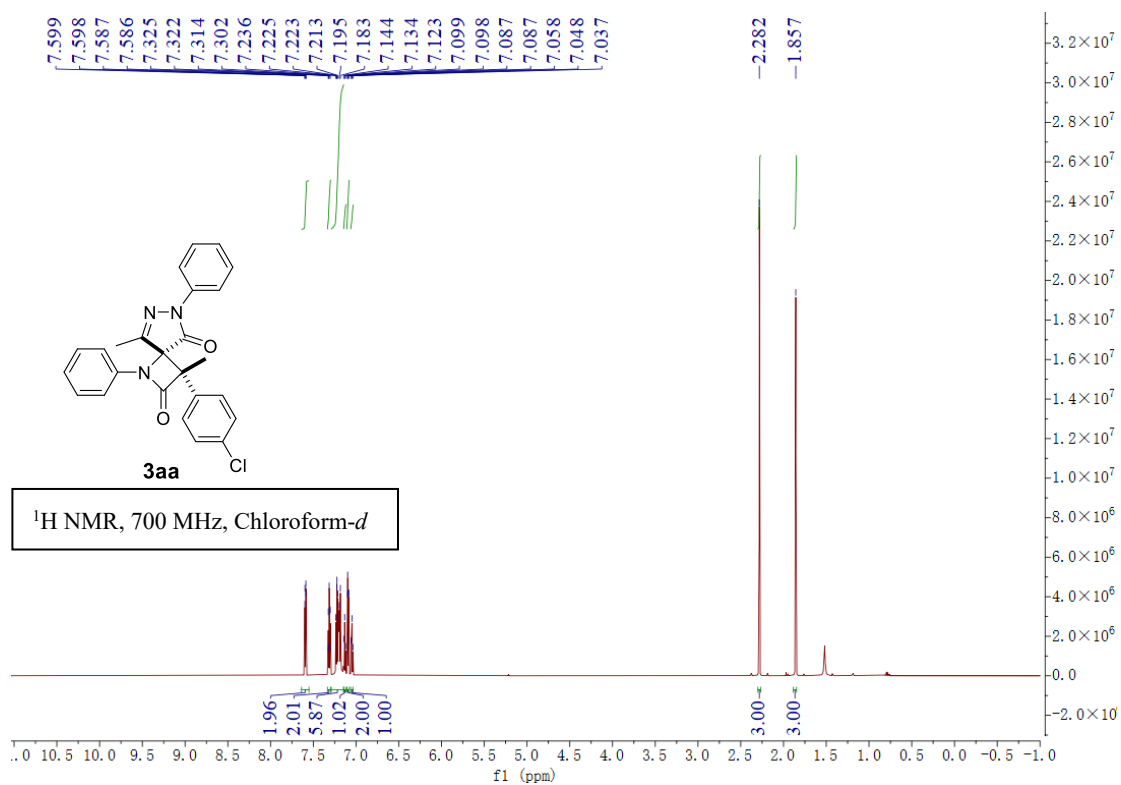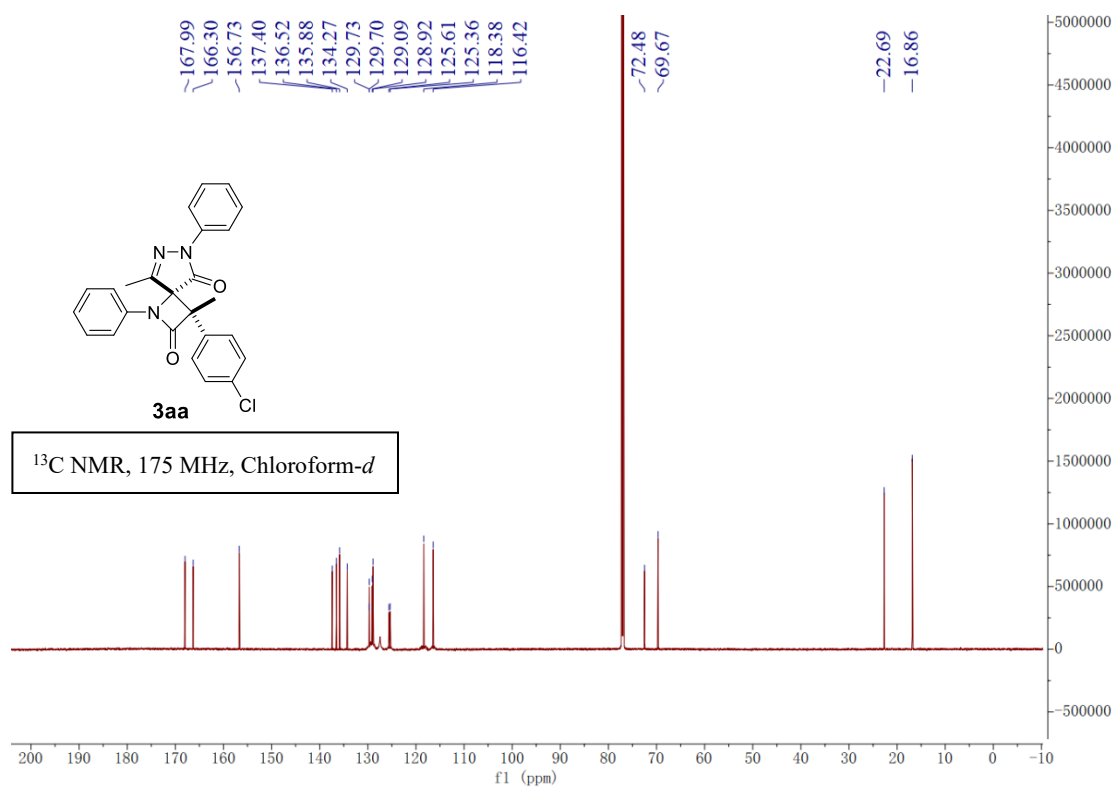



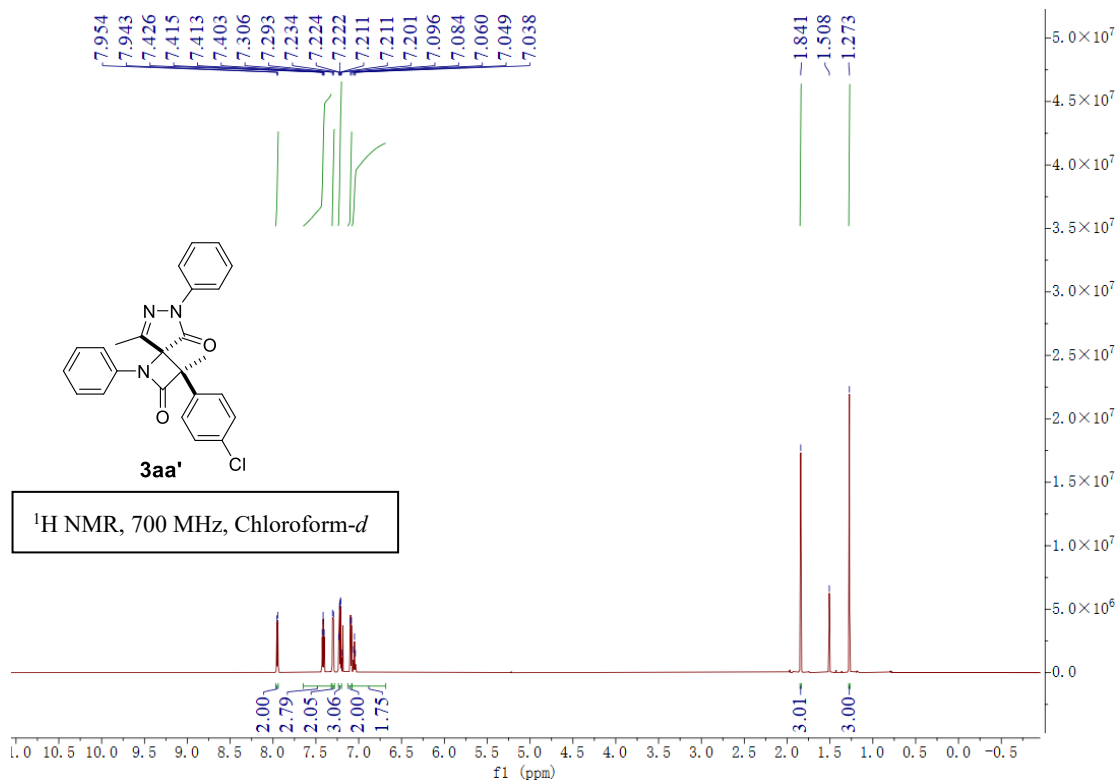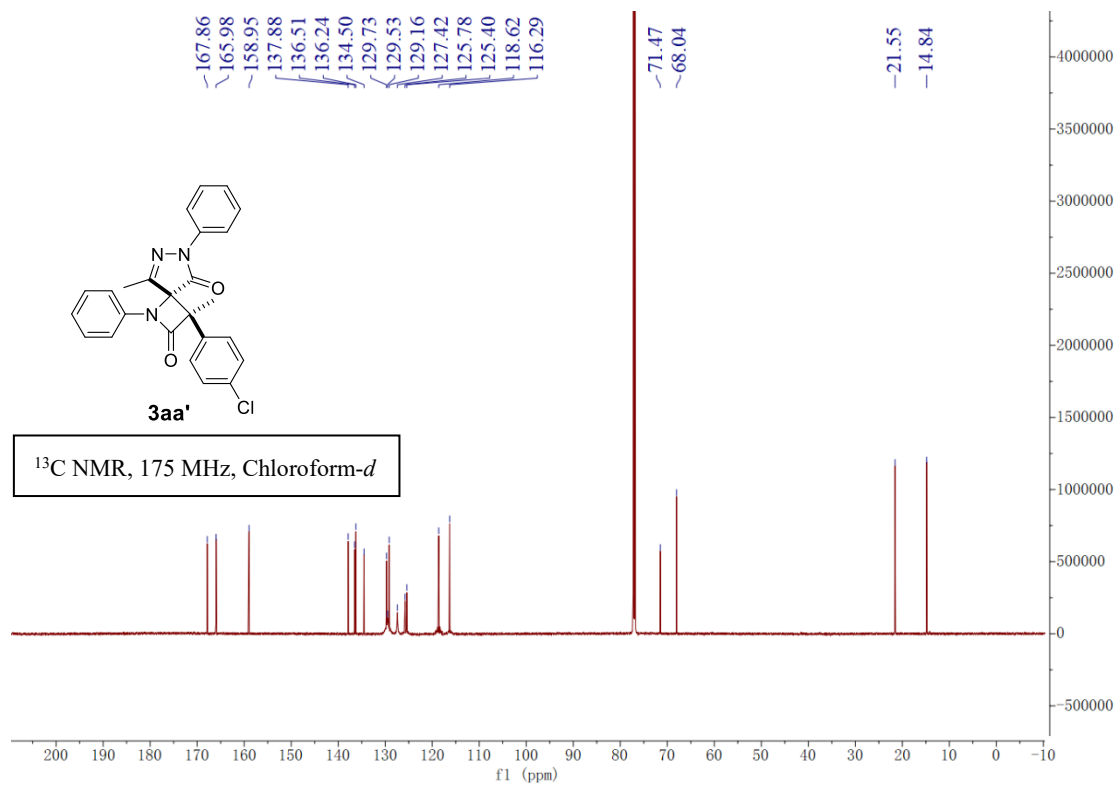

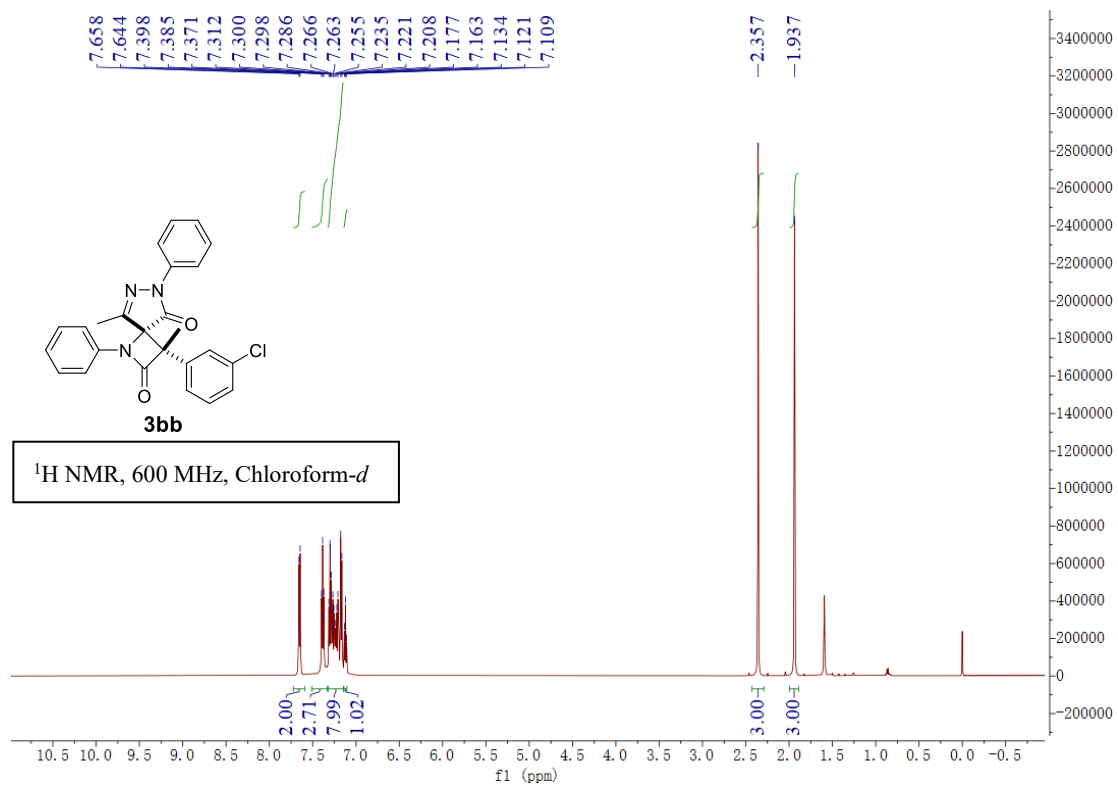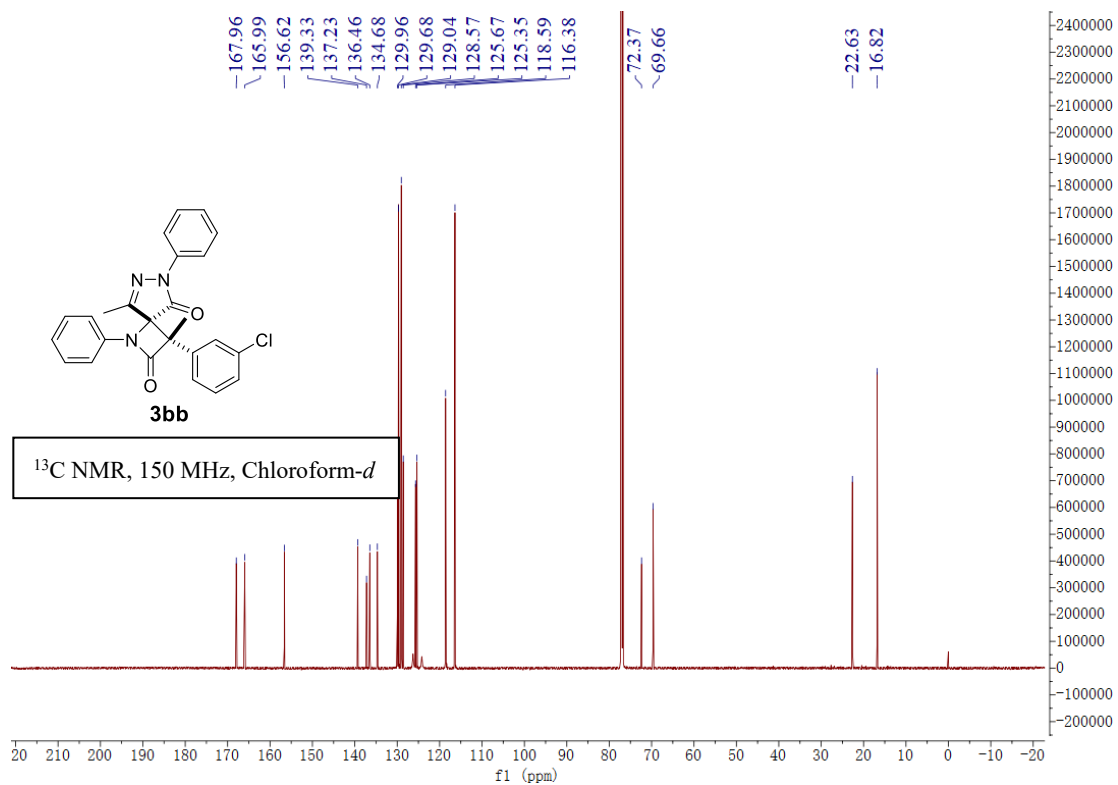

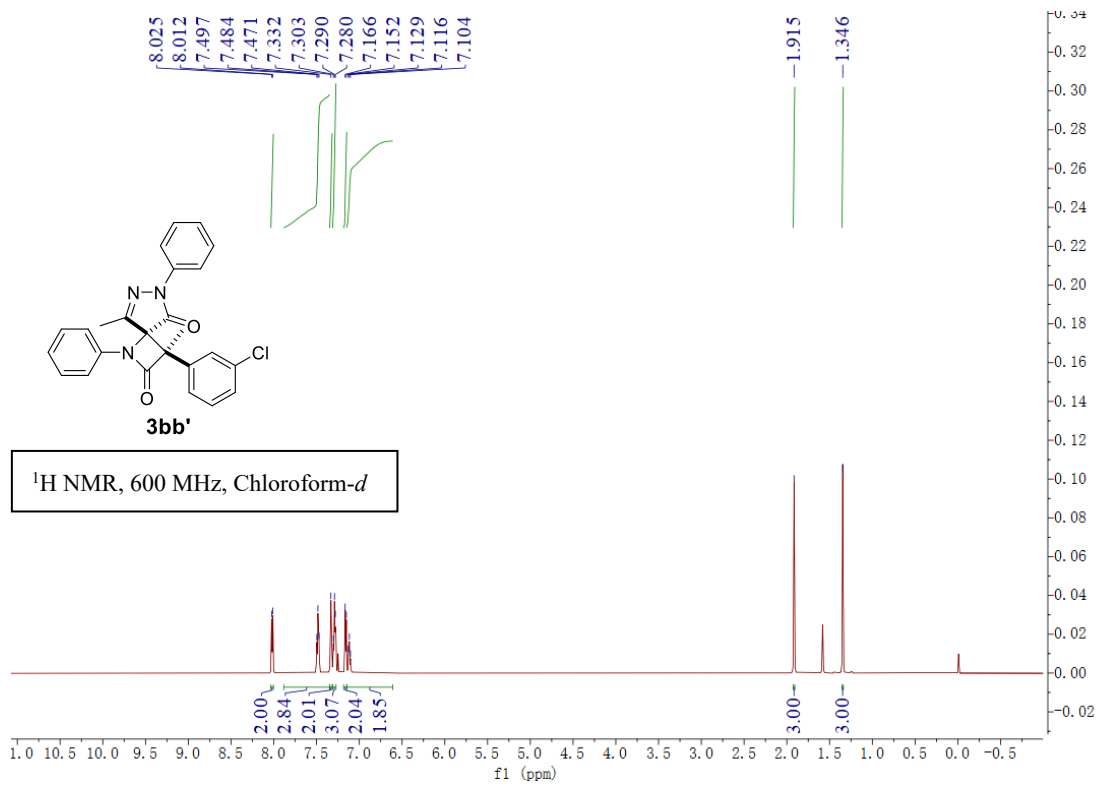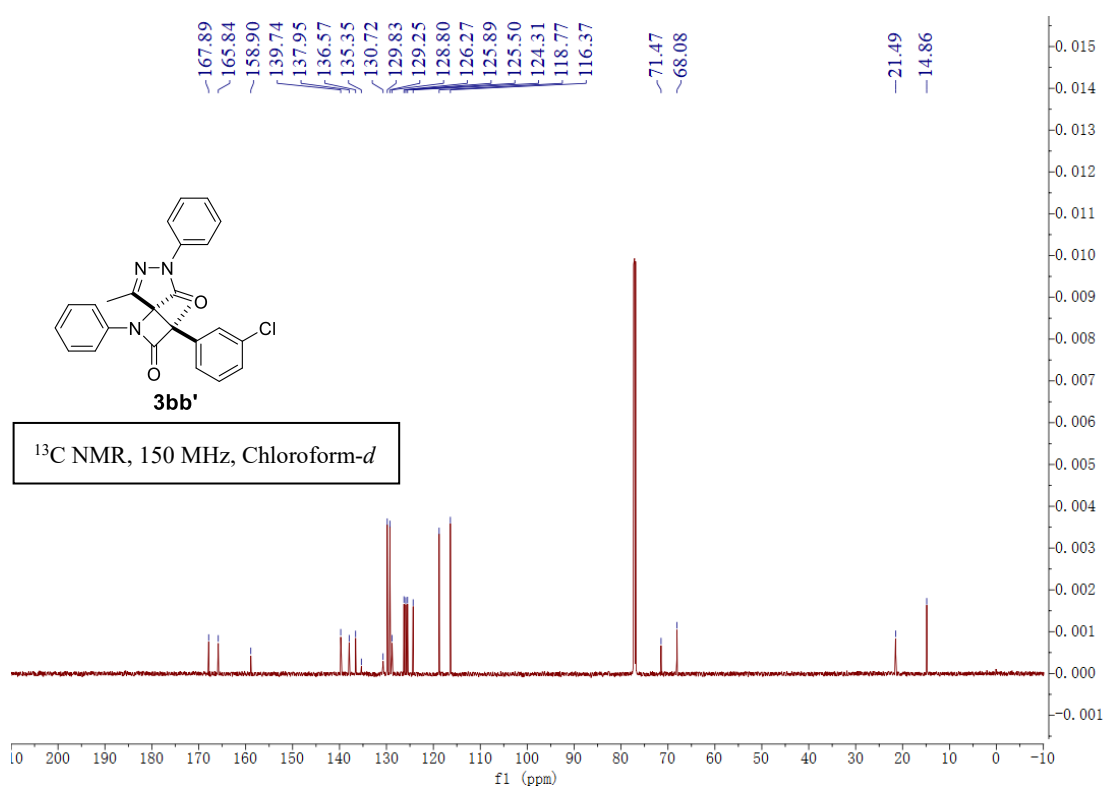

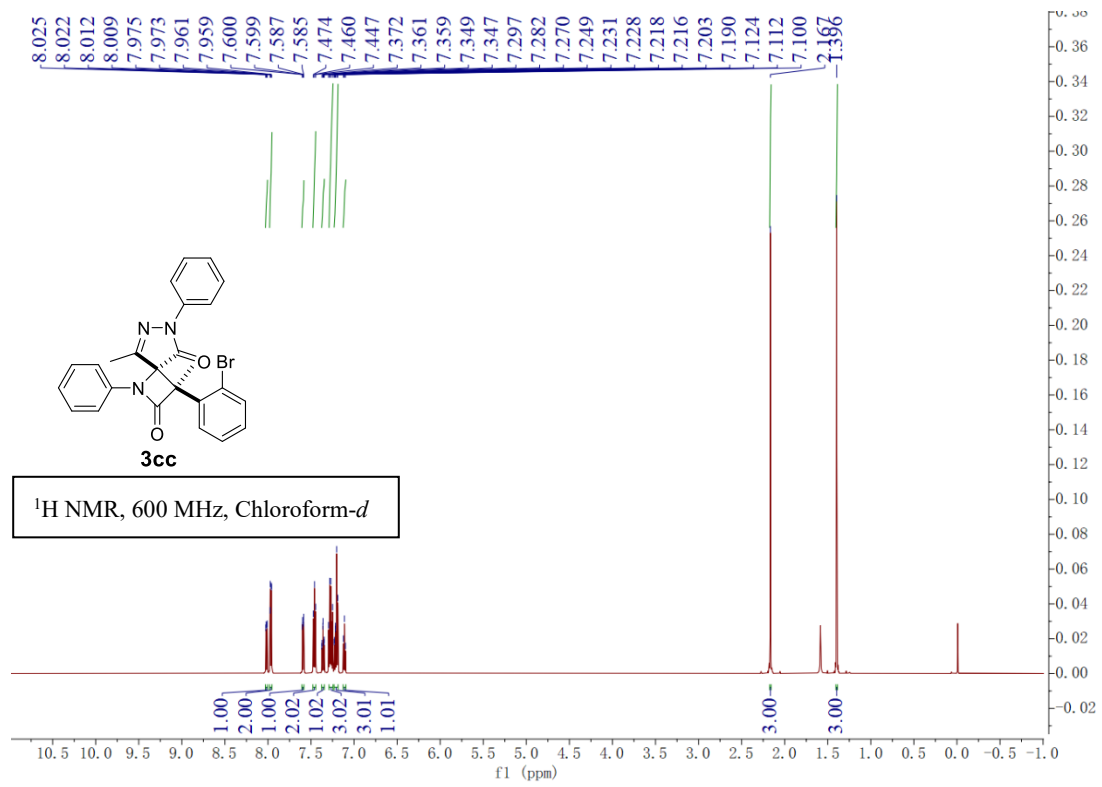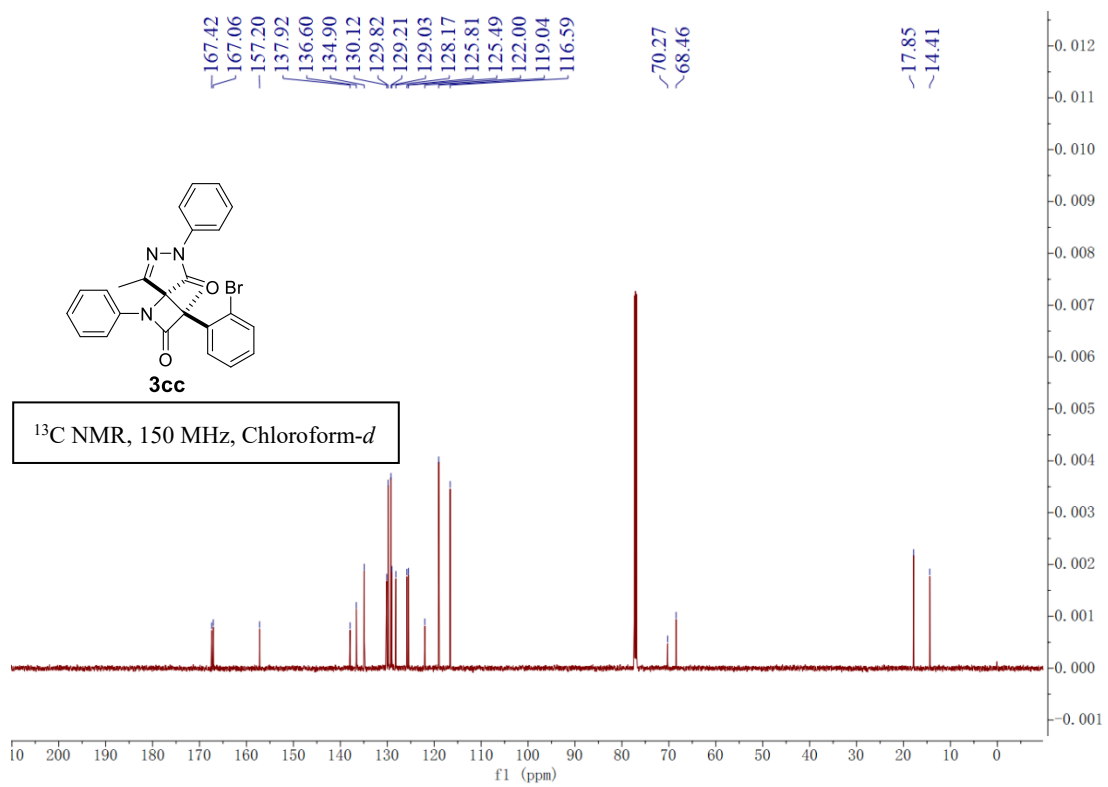

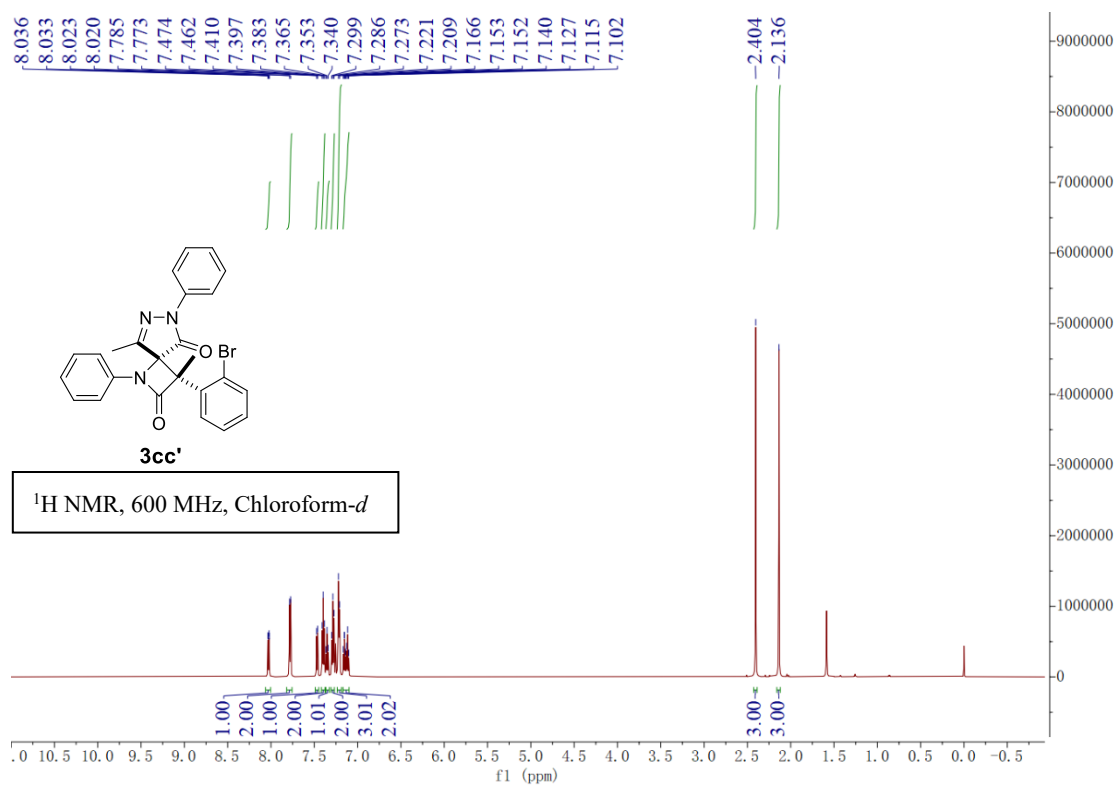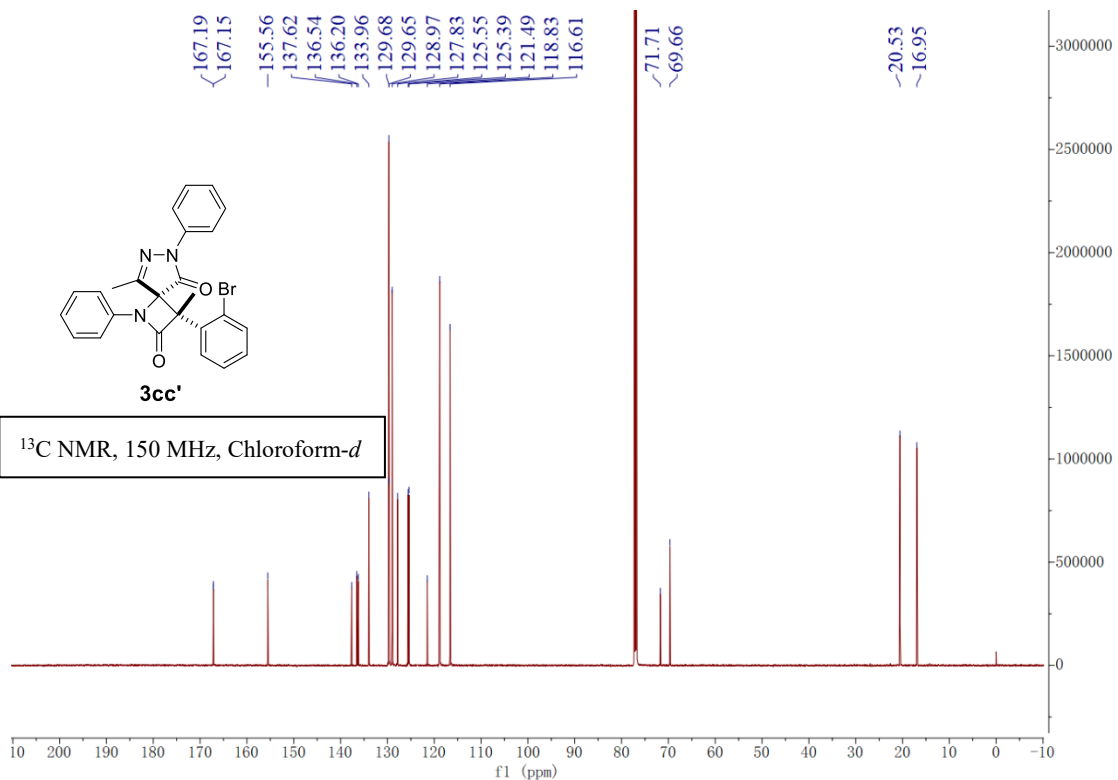

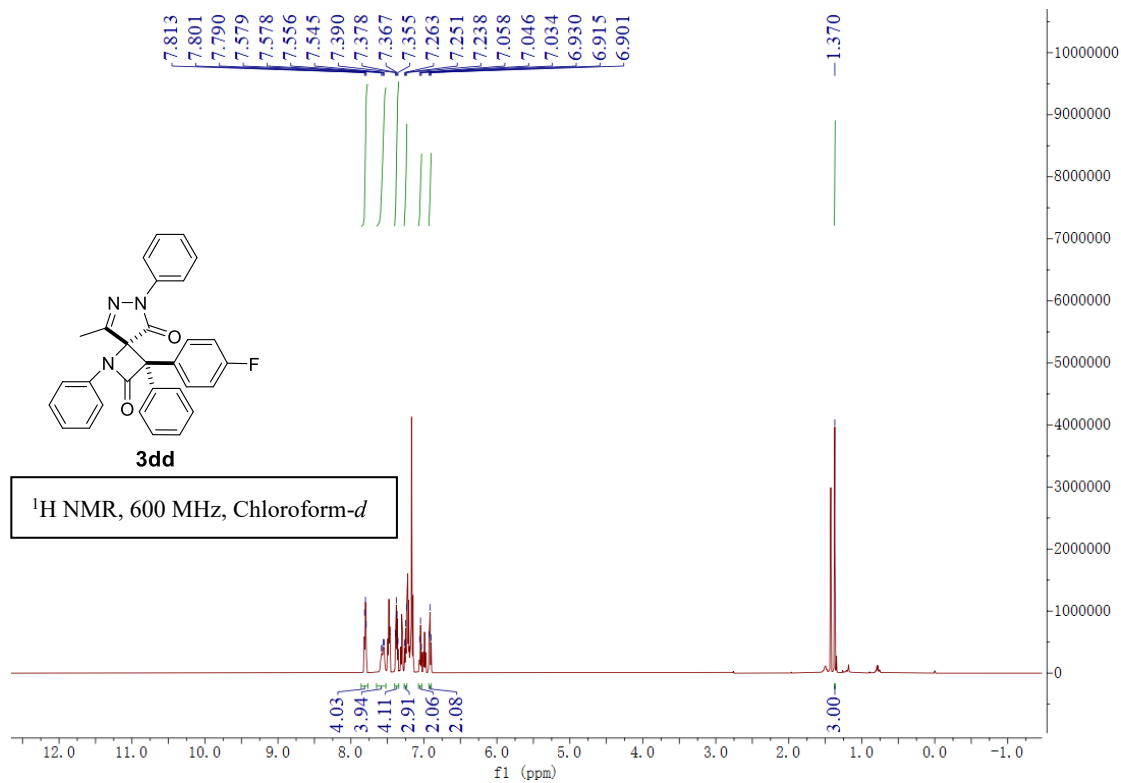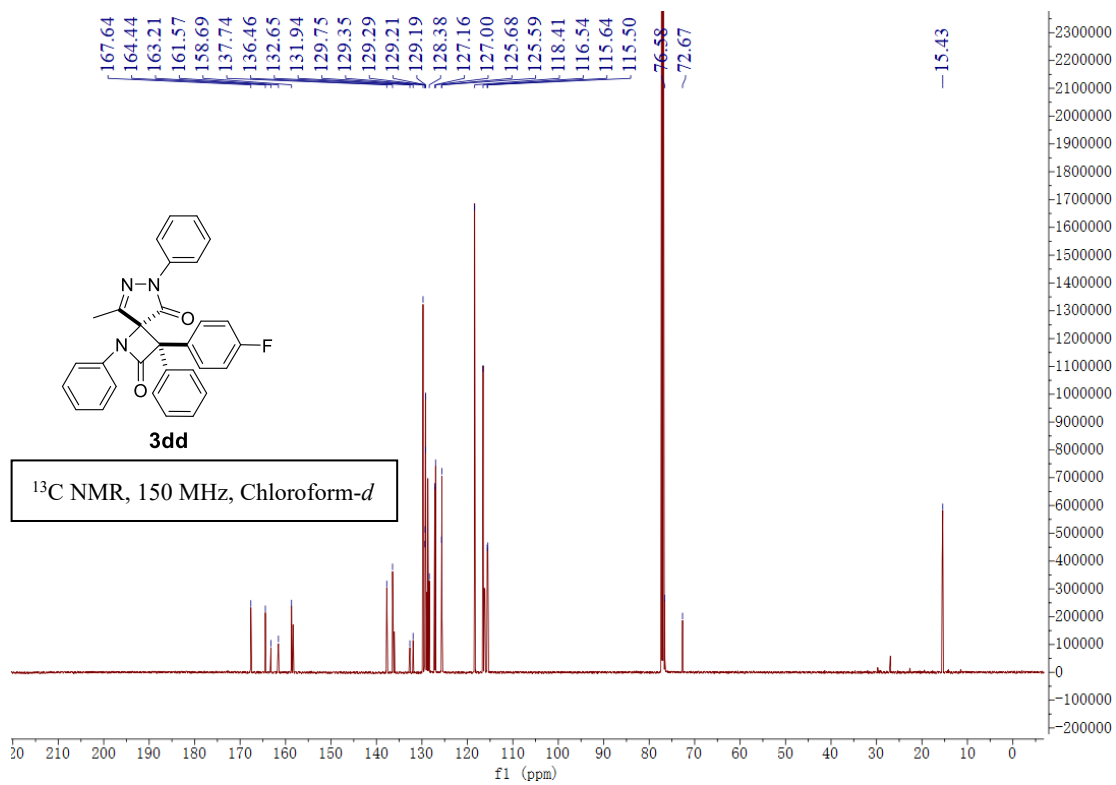

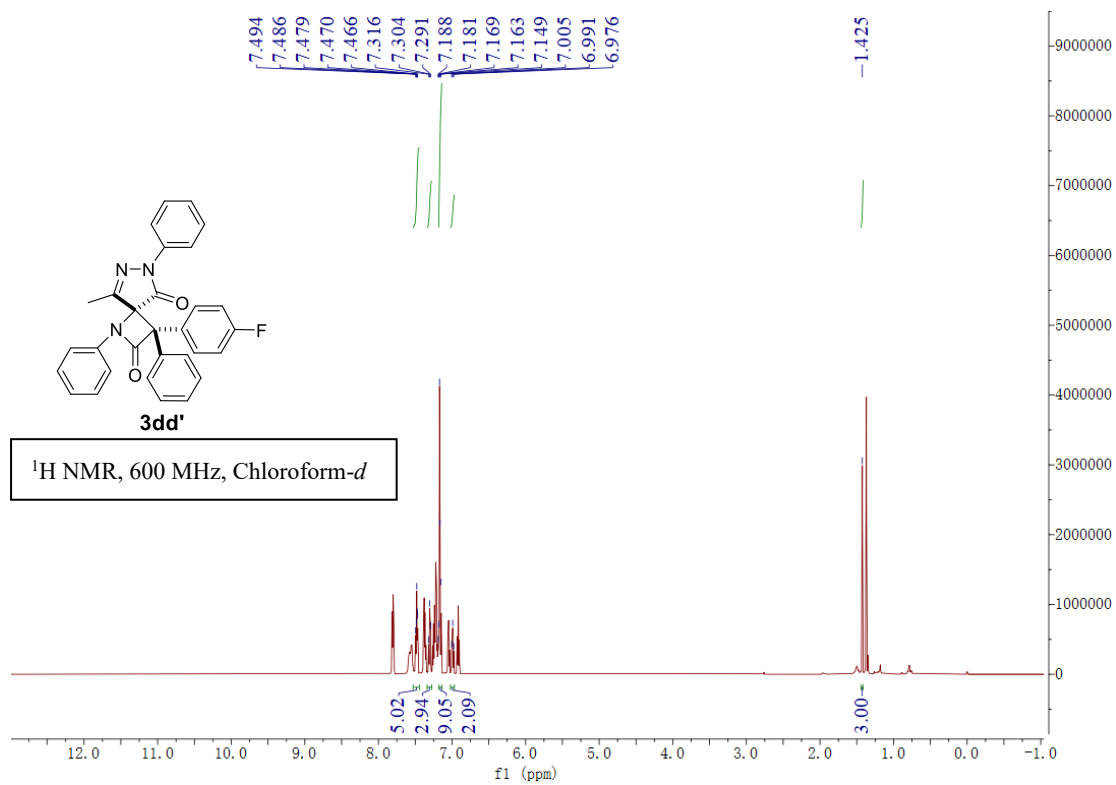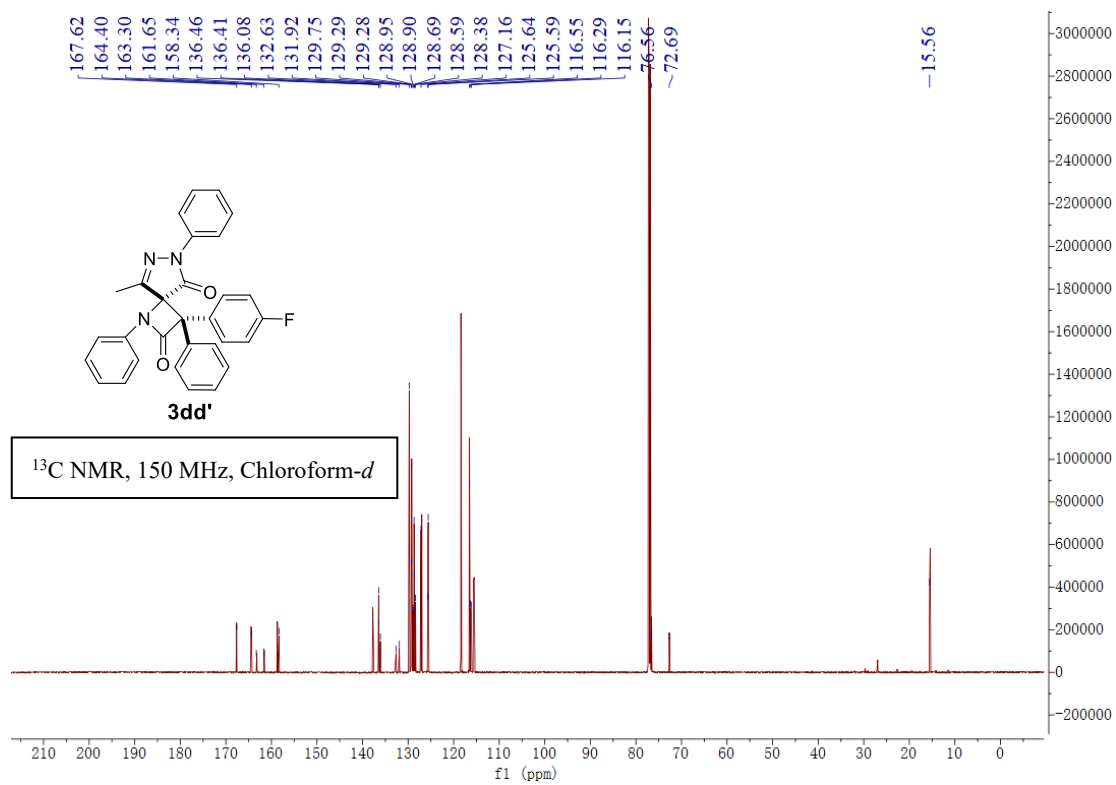

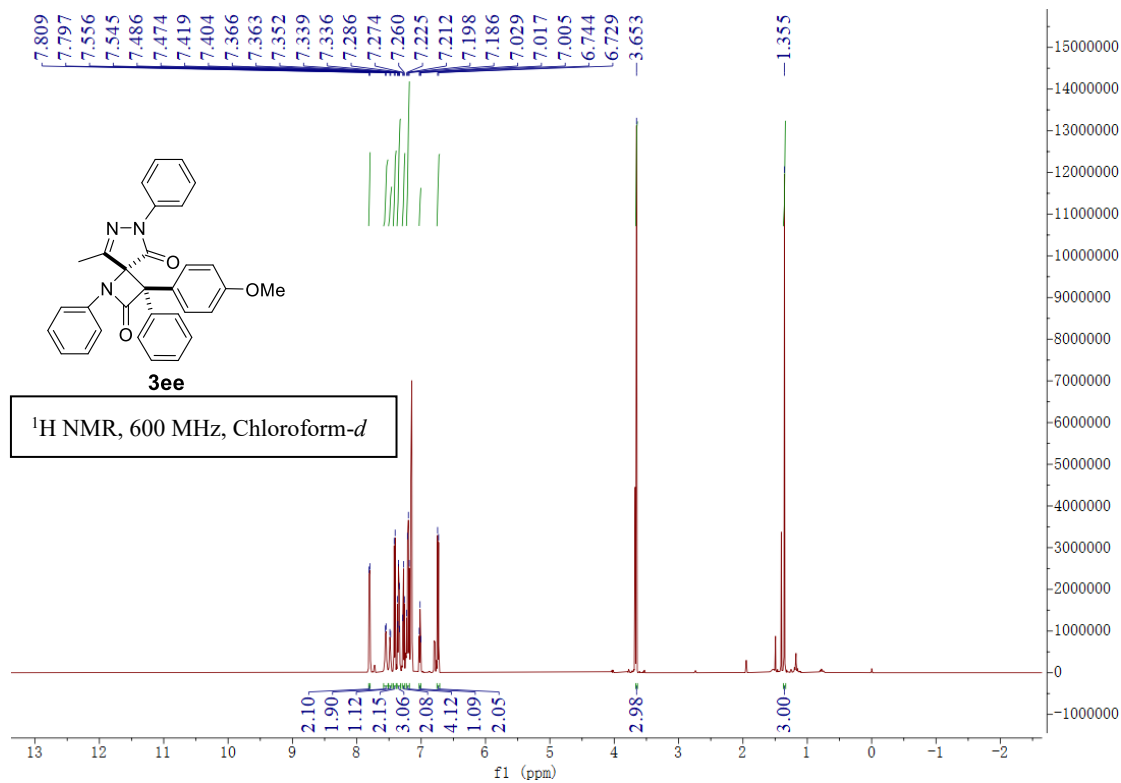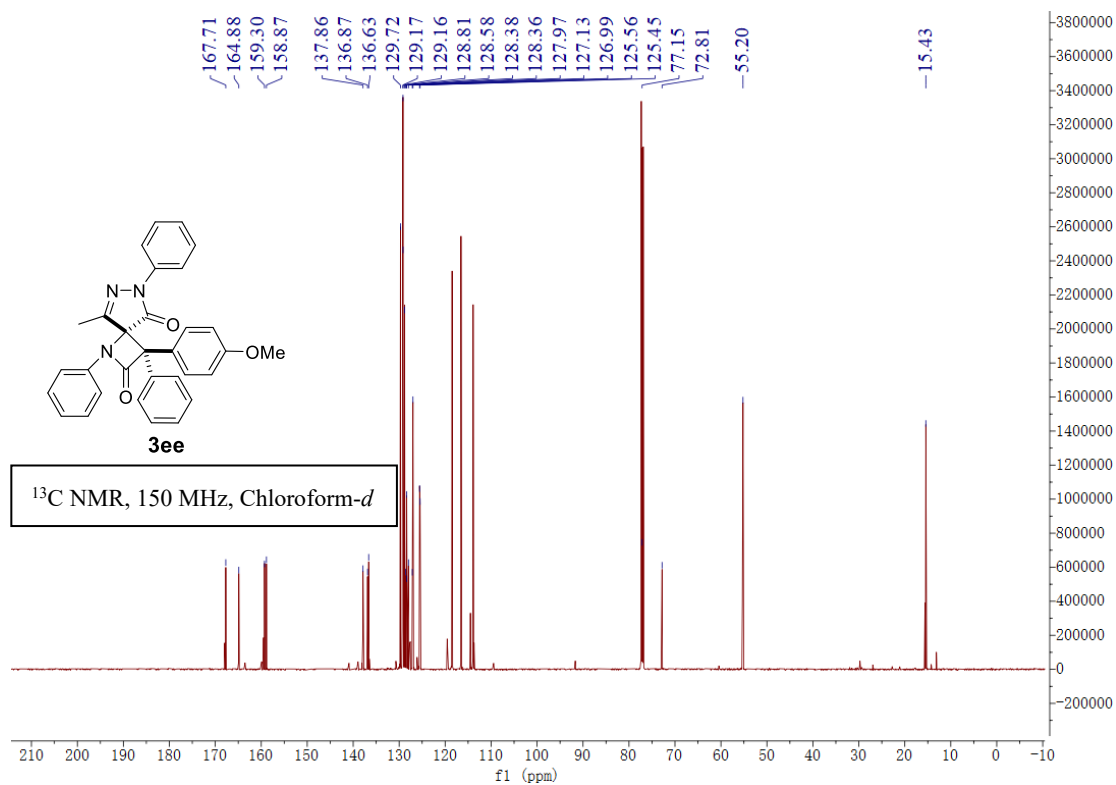



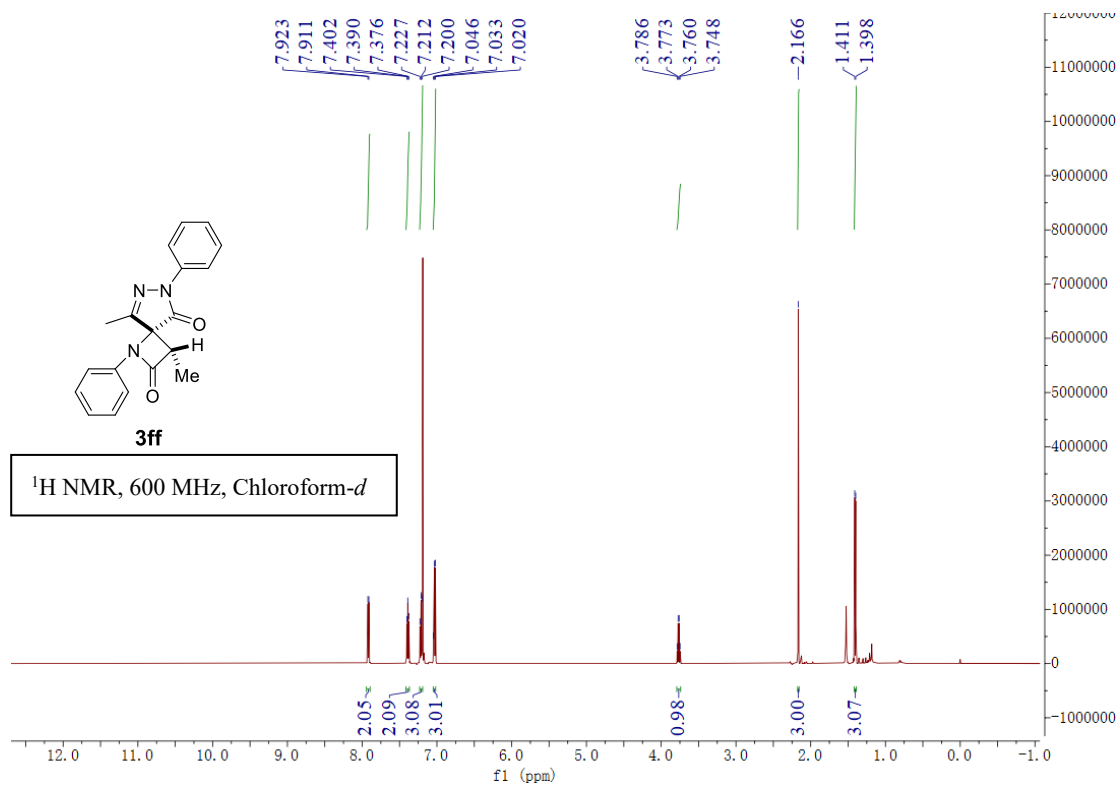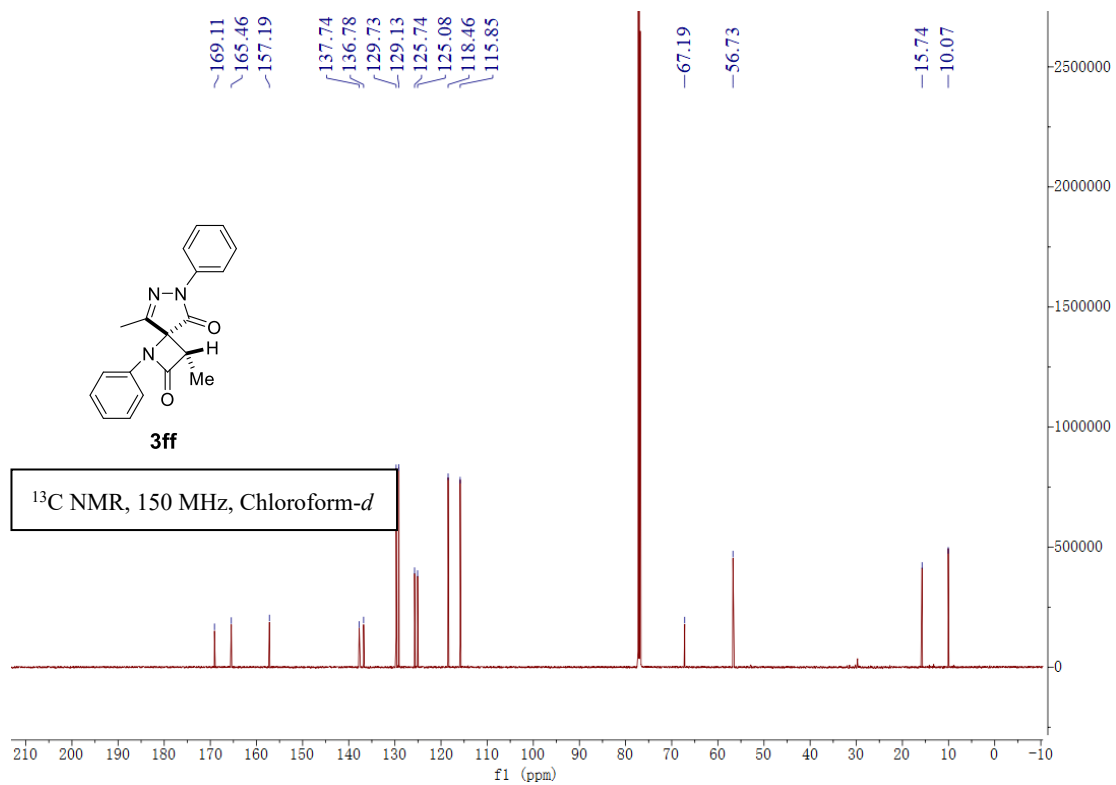

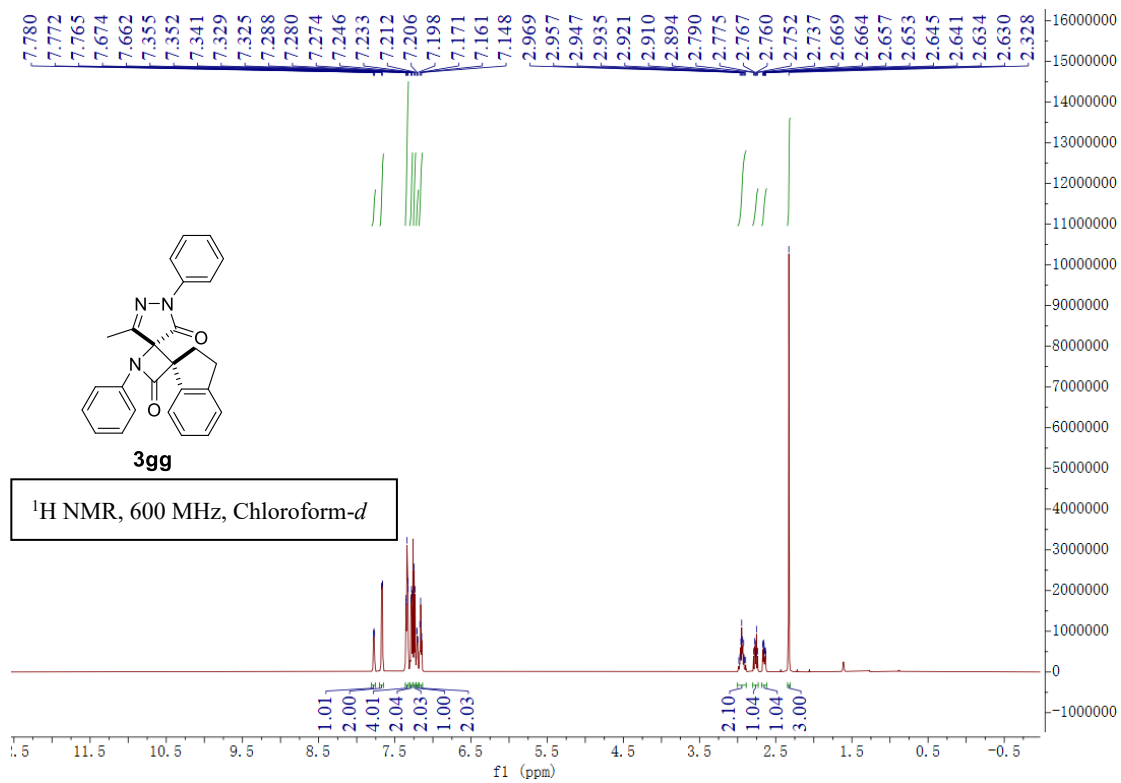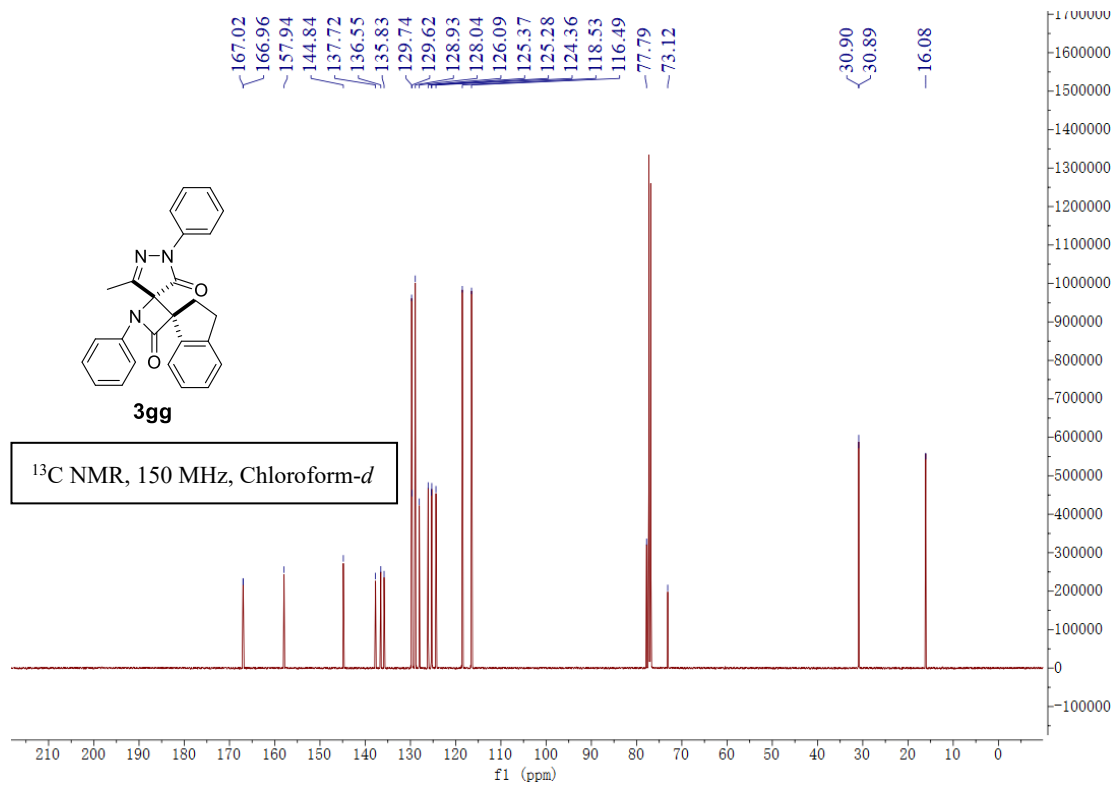

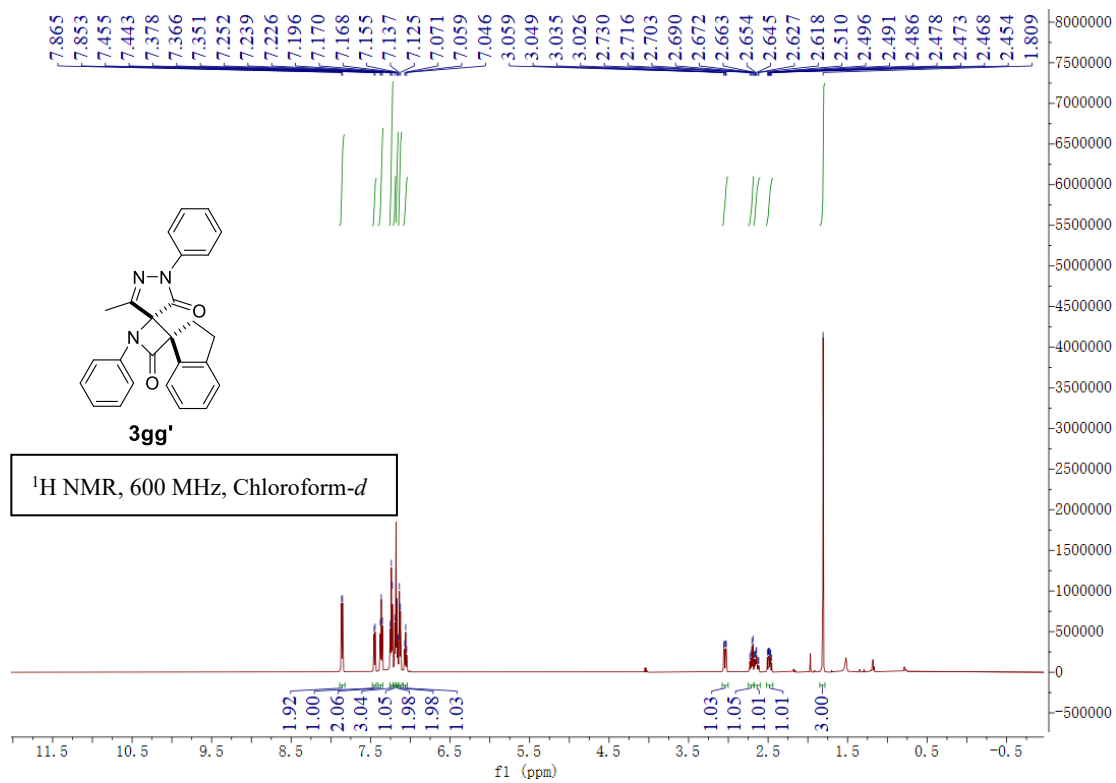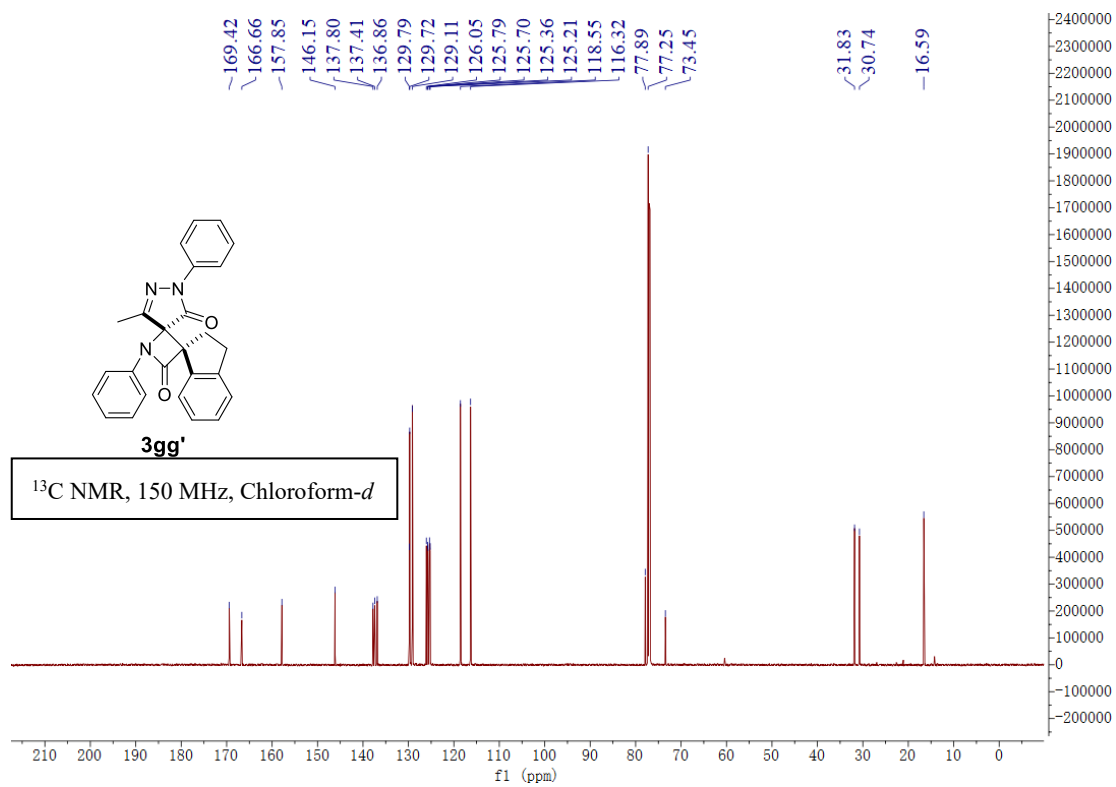

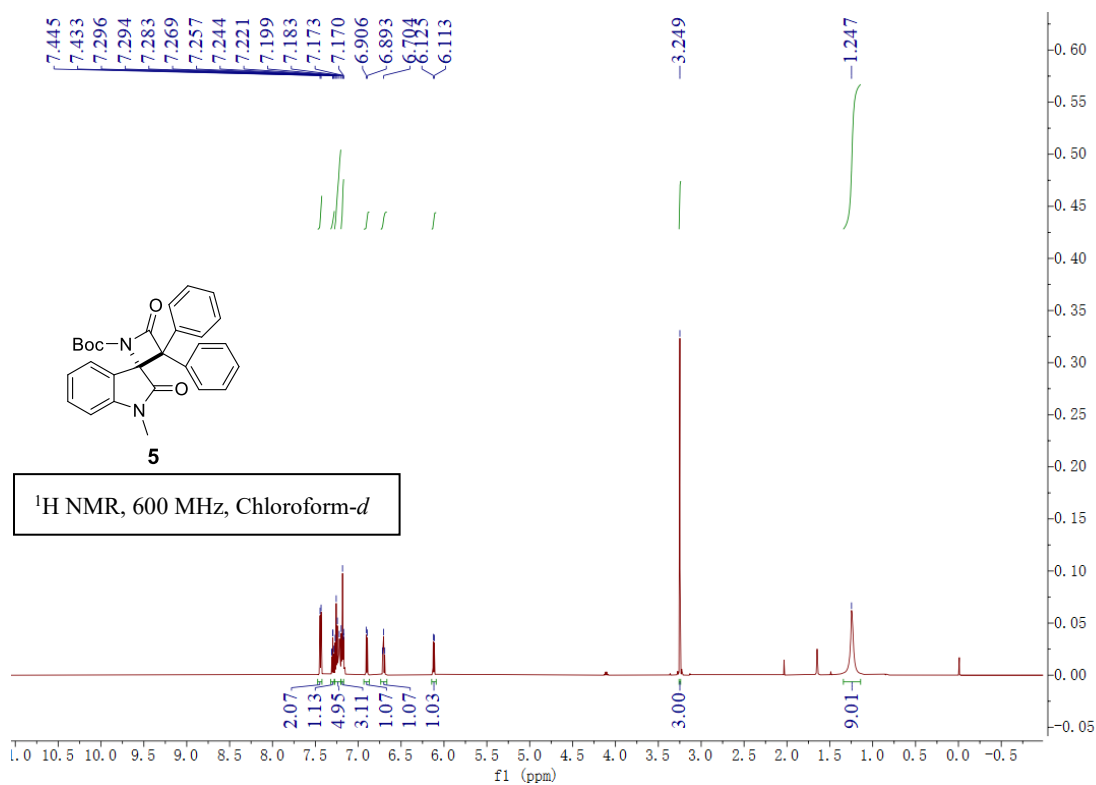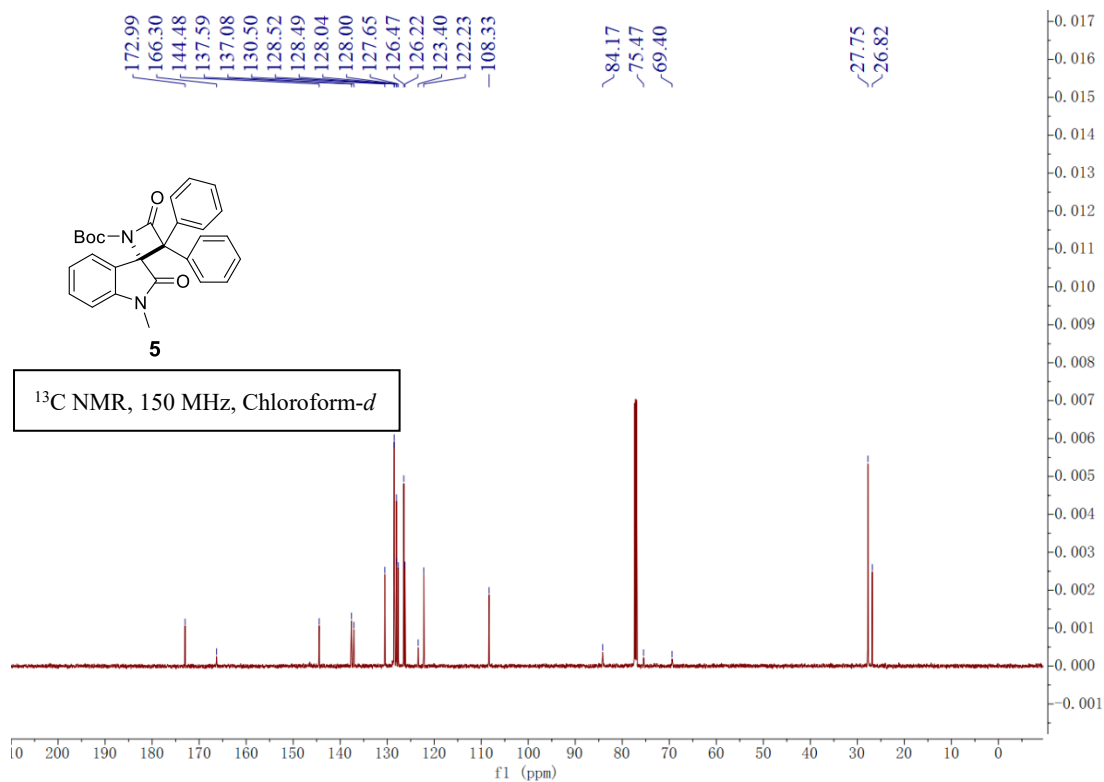

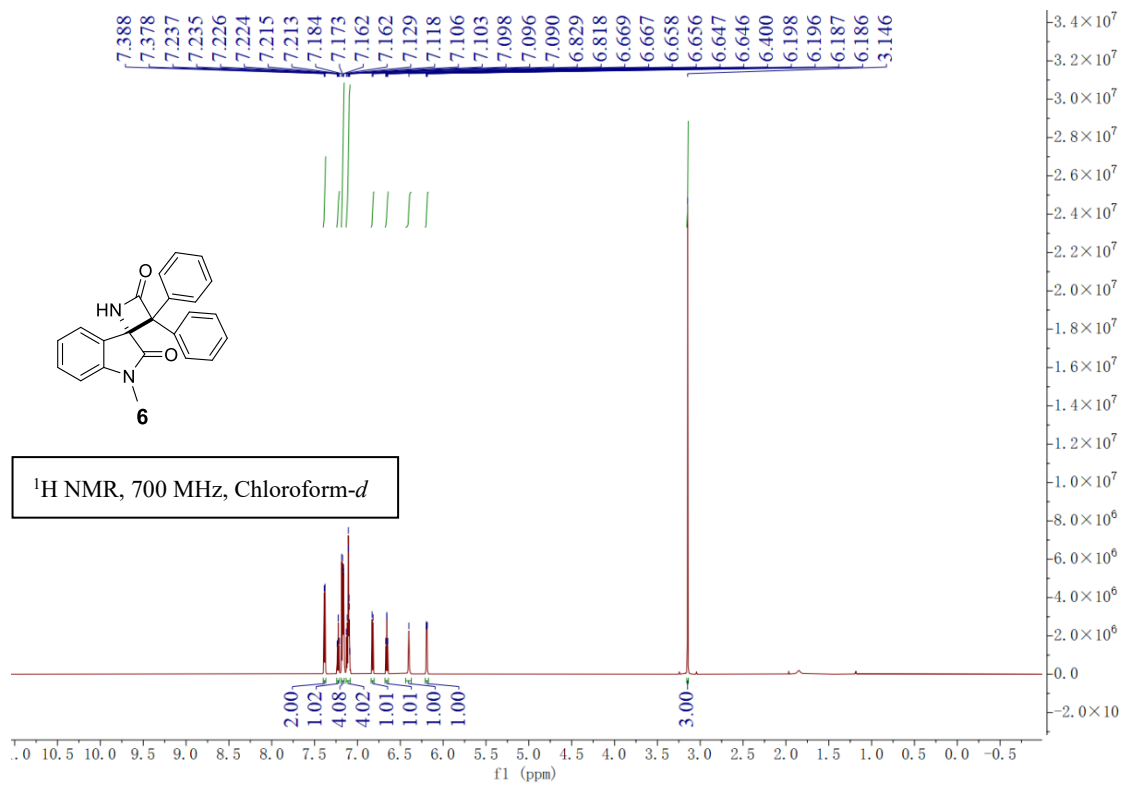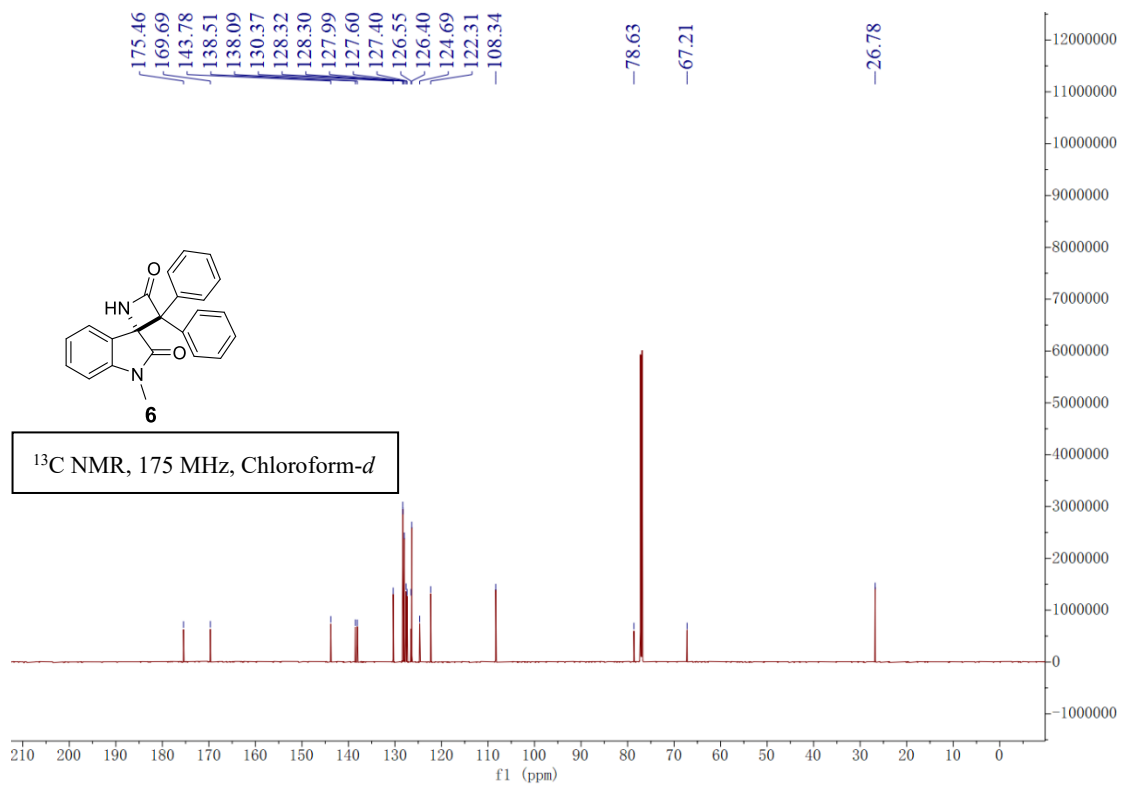

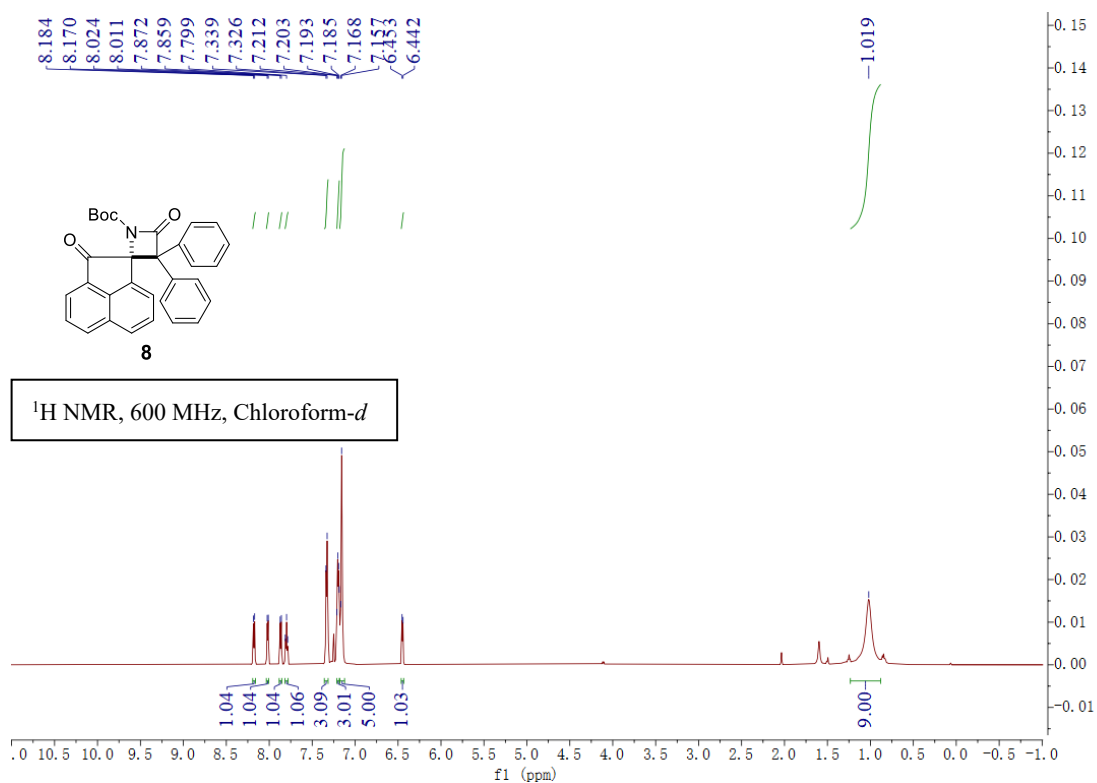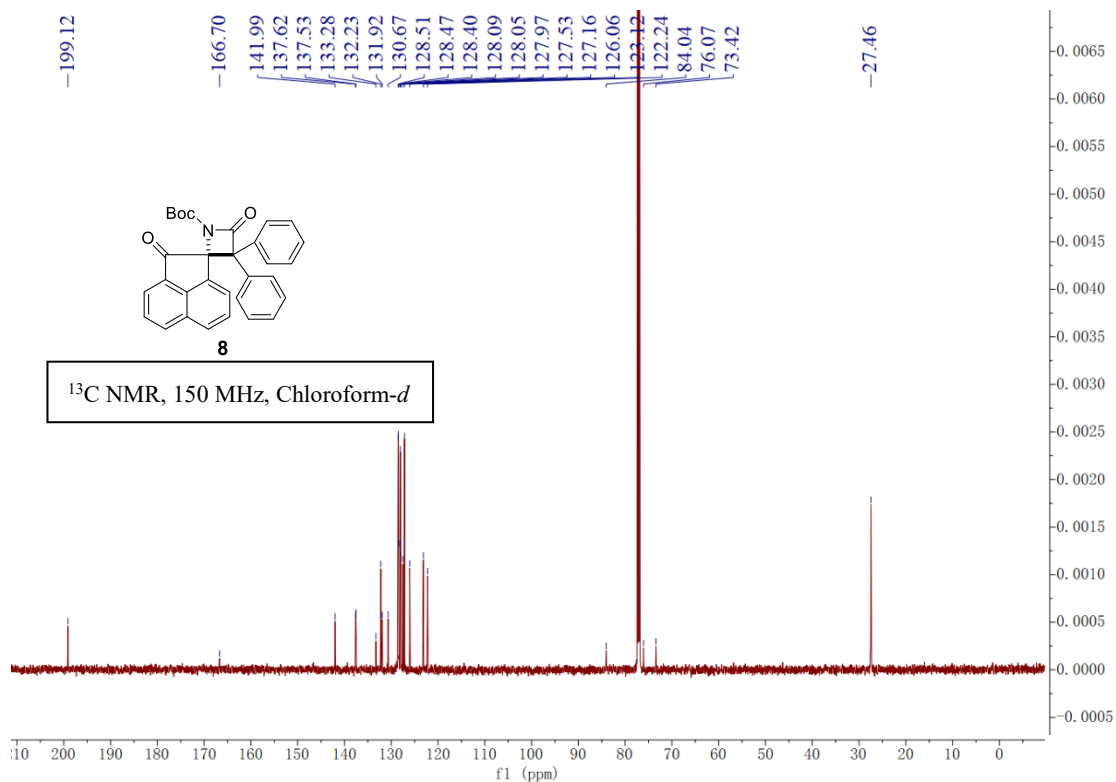

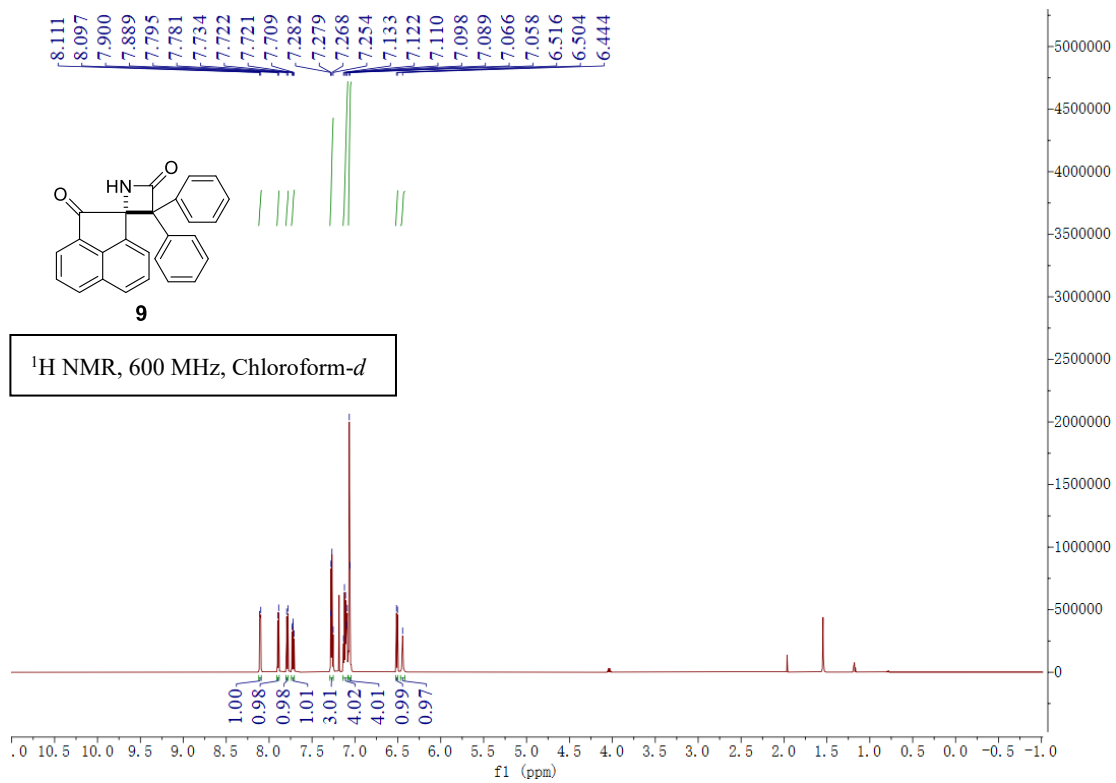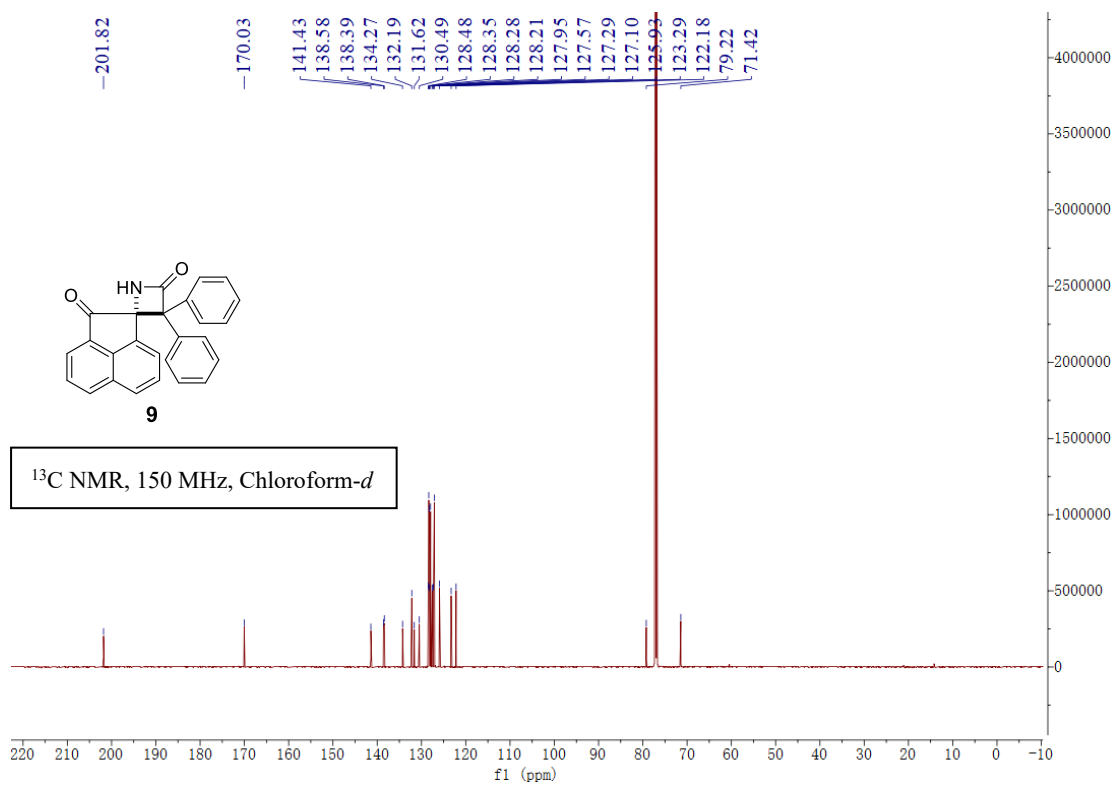

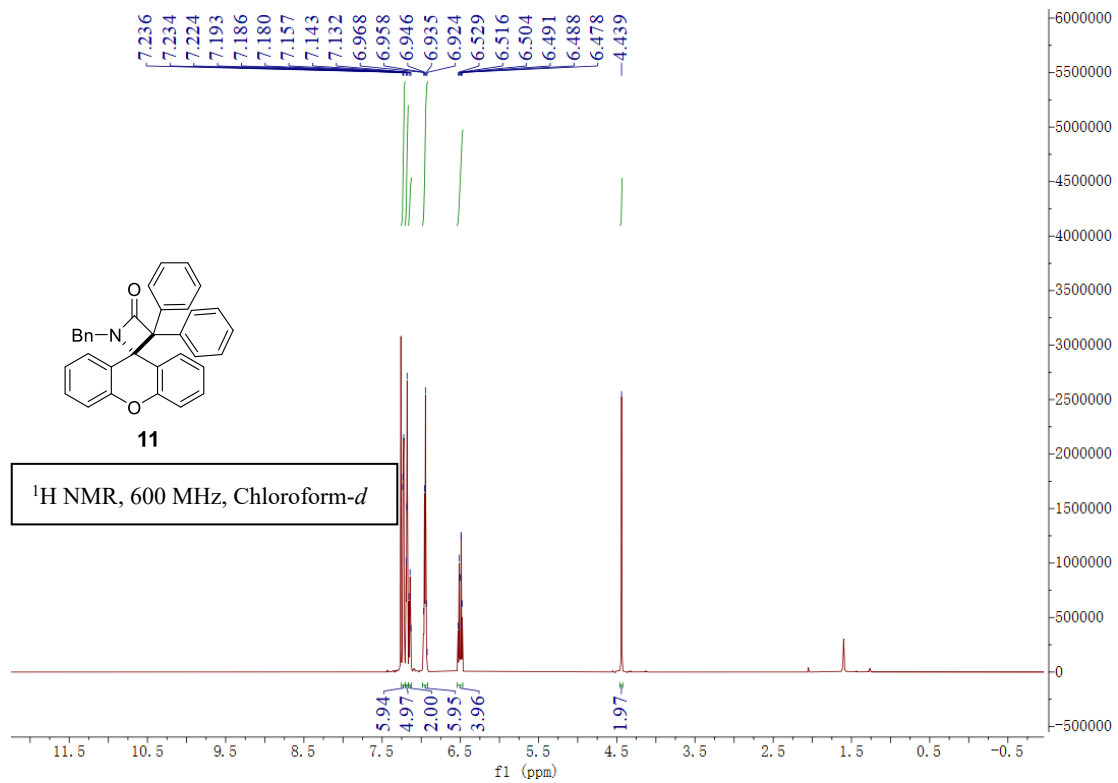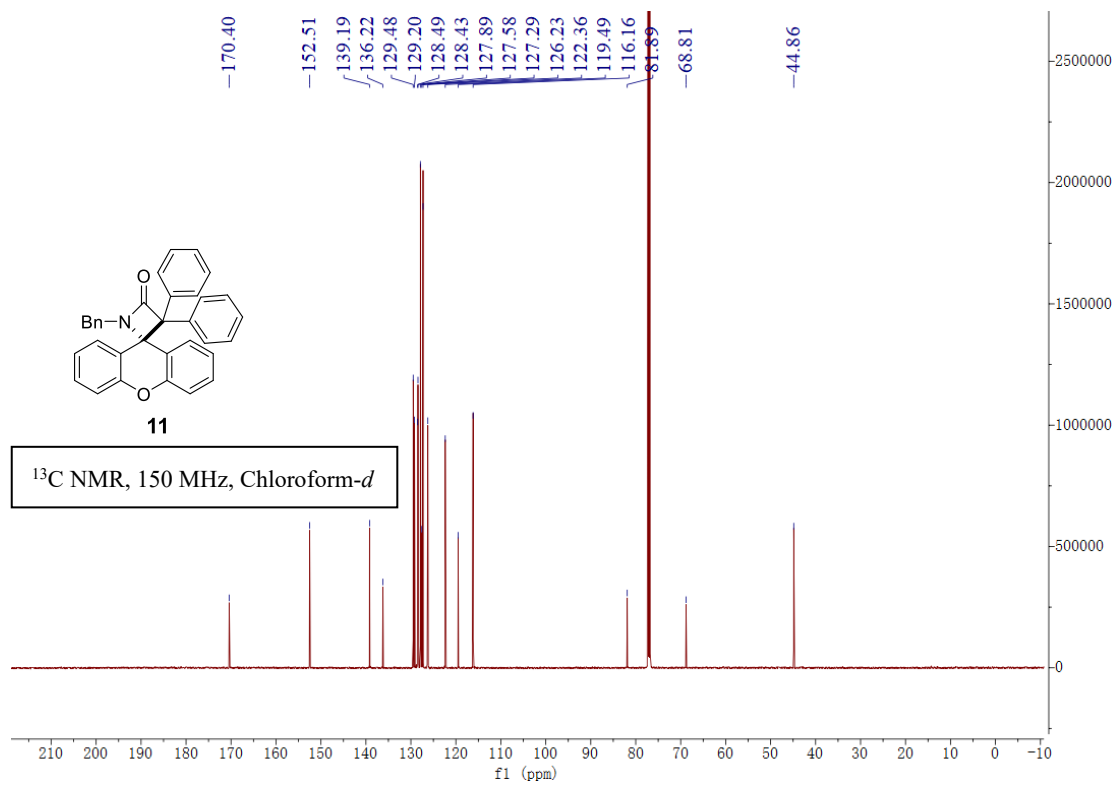



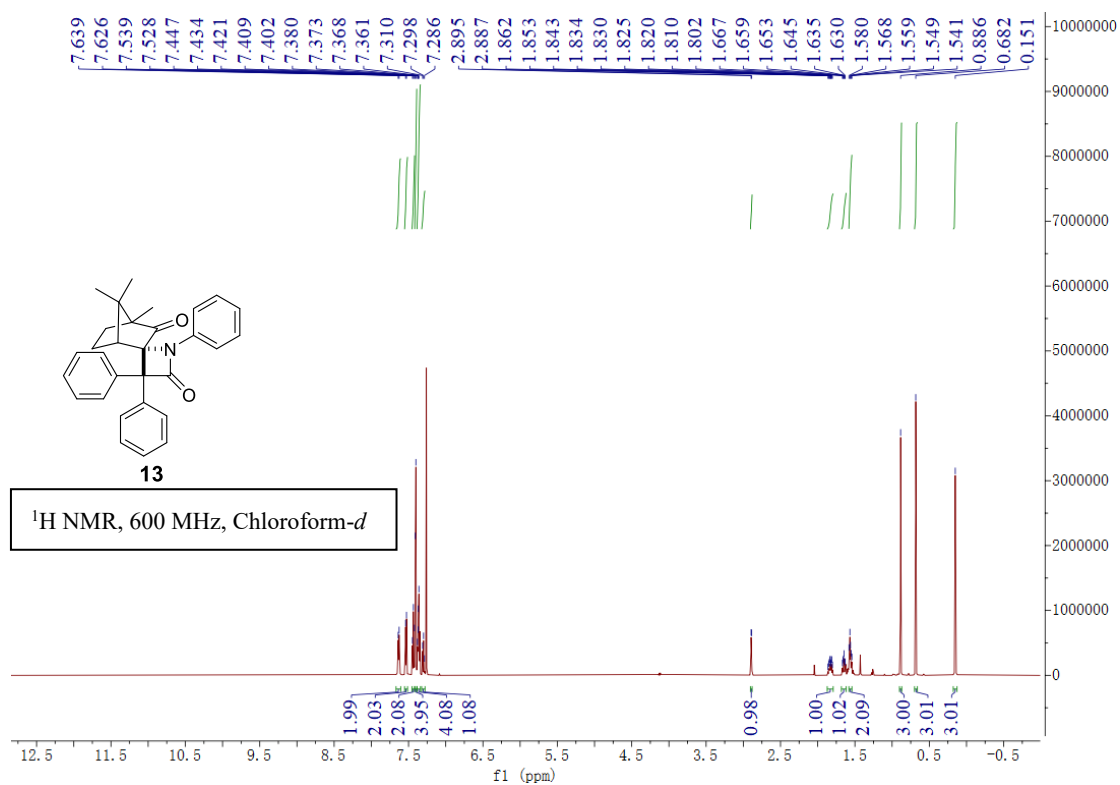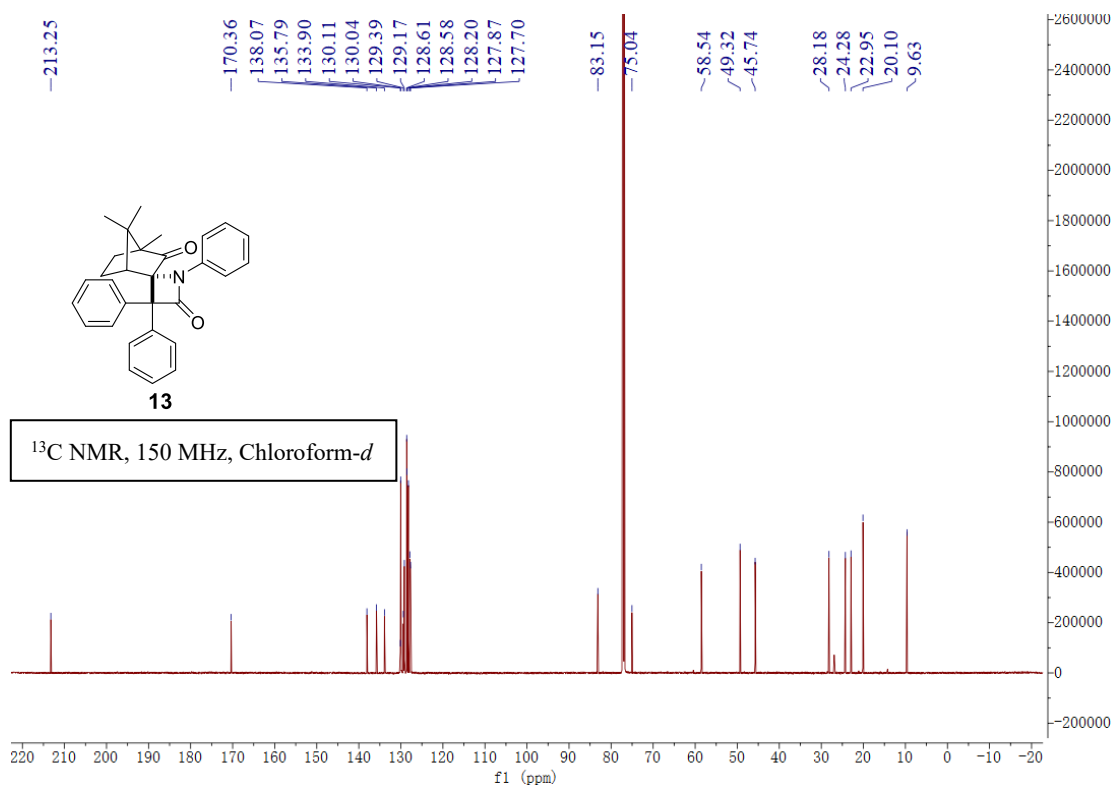

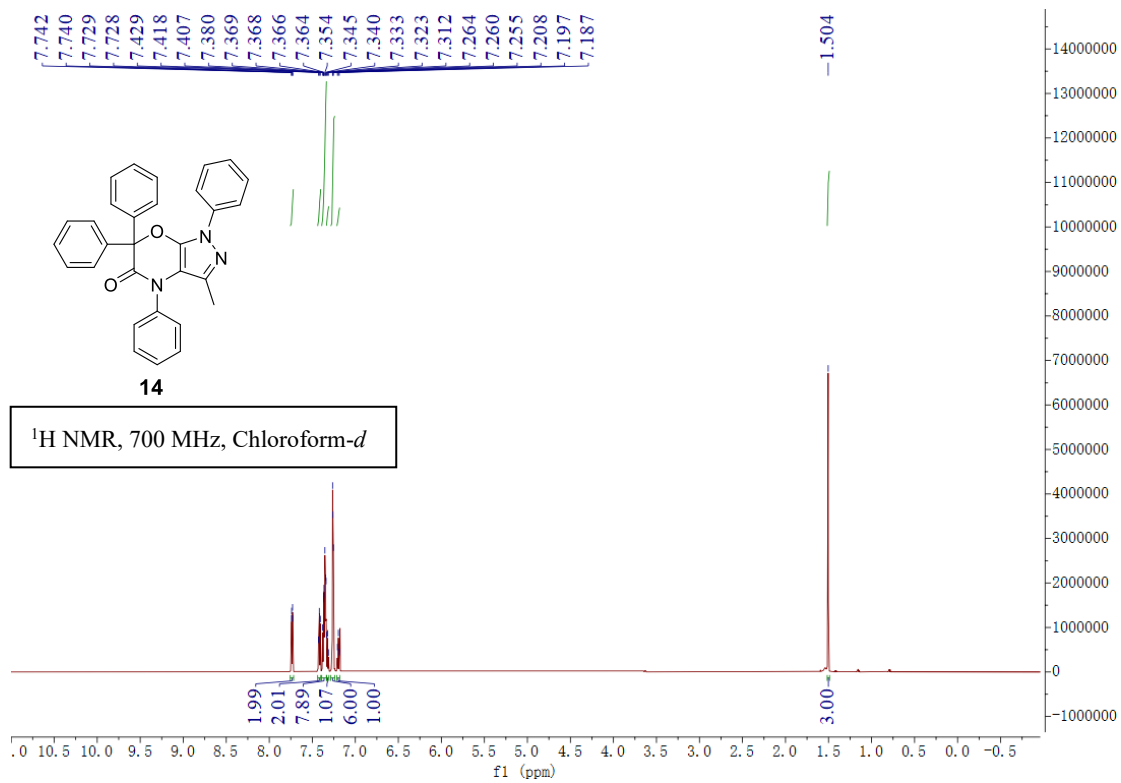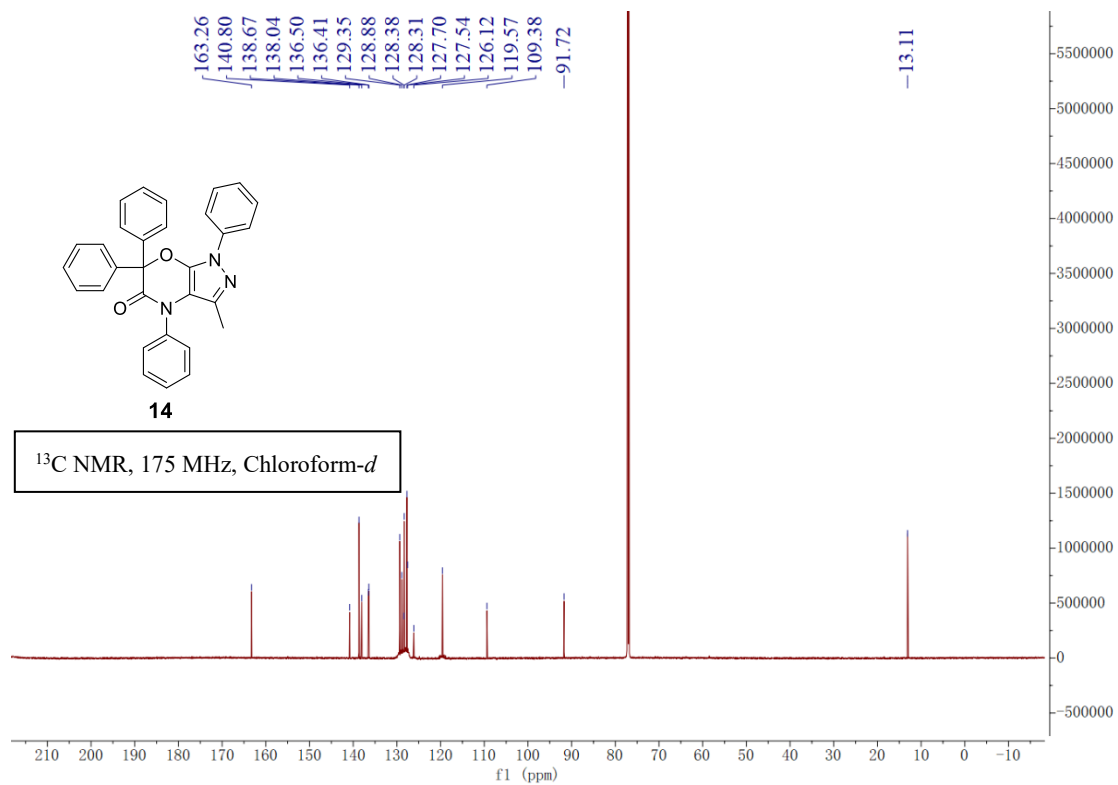

Supplement: d2qo00742h1.pdf [file d2qo00742h1.pdf]
